# Supplementary material for: Evolutionary Toxicogenomics of the Striped Killifish (Fundulus majalis) in the New Bedford Harbor (Massachusetts, USA)
Source: PubMed Central journal article supplement (PMC6429206; doi:10.3390/ijms20051129), 2019-03-05
Supplement: ijms-20-01129-s001.pdf [file ijms-20-01129-s001.pdf]

## SUPPLEMENTARY FIGURES AND TABLES TO RUGGERI ET AL. (XXXX)

**Figure S1. STRUCTURE\_Simulations outcomes based on the use of non-neutral loci (outliers + loci under linkage disequilibrium) [Figure S1 a-b], based on exclusively neutral loci [Figure S1 c-d] and based on the whole set of 4128 SNPs [Figure S1 e-f]. Plots a-c-d refers to the mean Logarithmic Probability values for any simulated K clusters. Plots b-d-f represent the best K based on the Evanno method.**

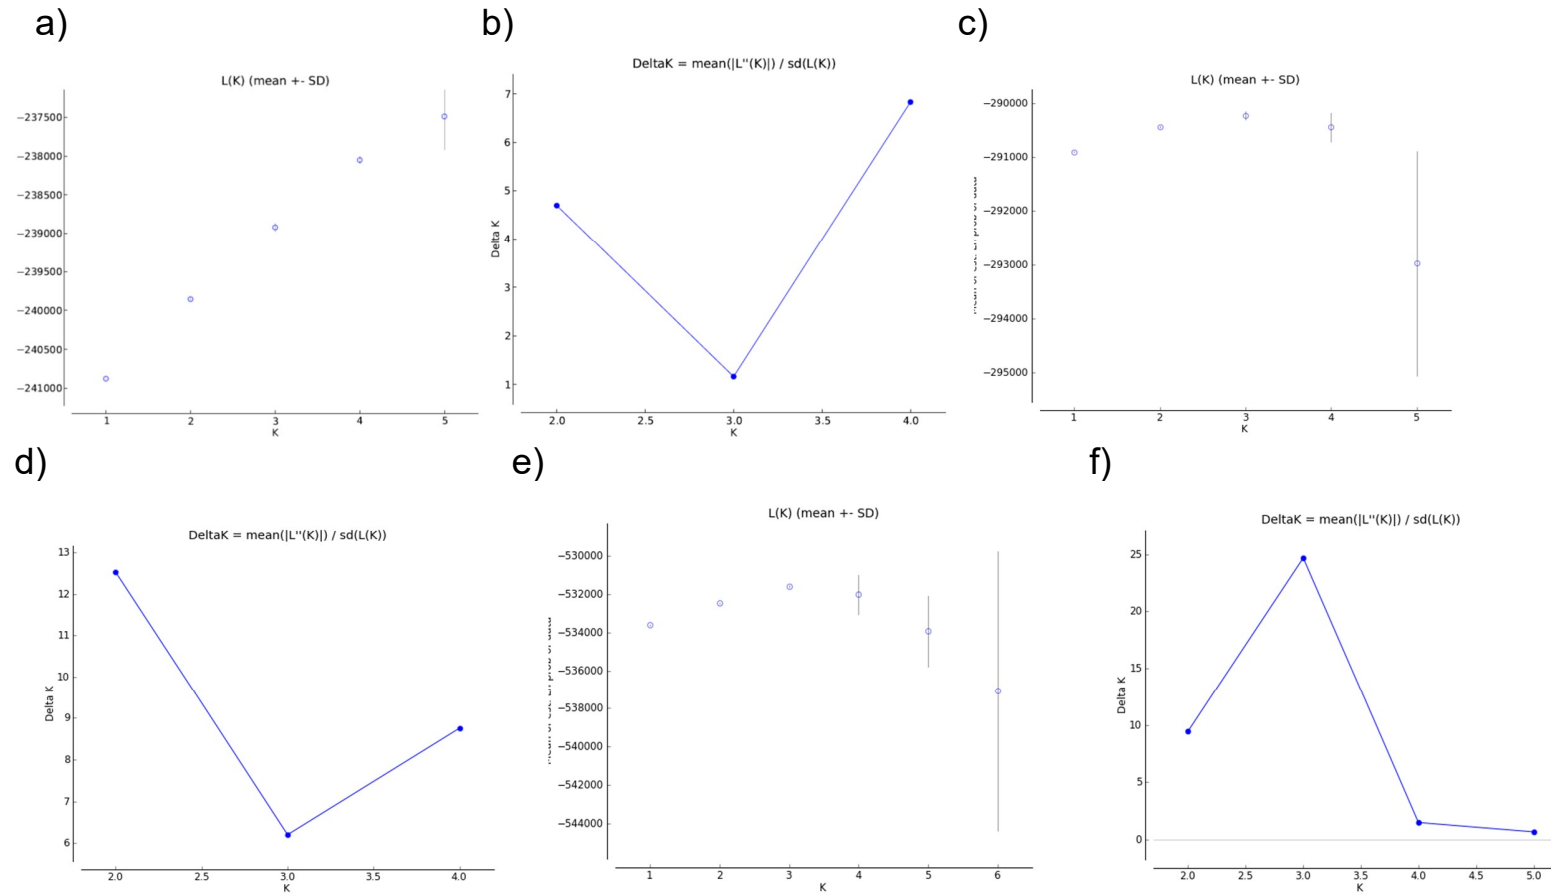

**Figure S2.** Annotations percentages by Taxonomical groups of living beings (upper pie chart) and Fish Orders (lower pie chart).

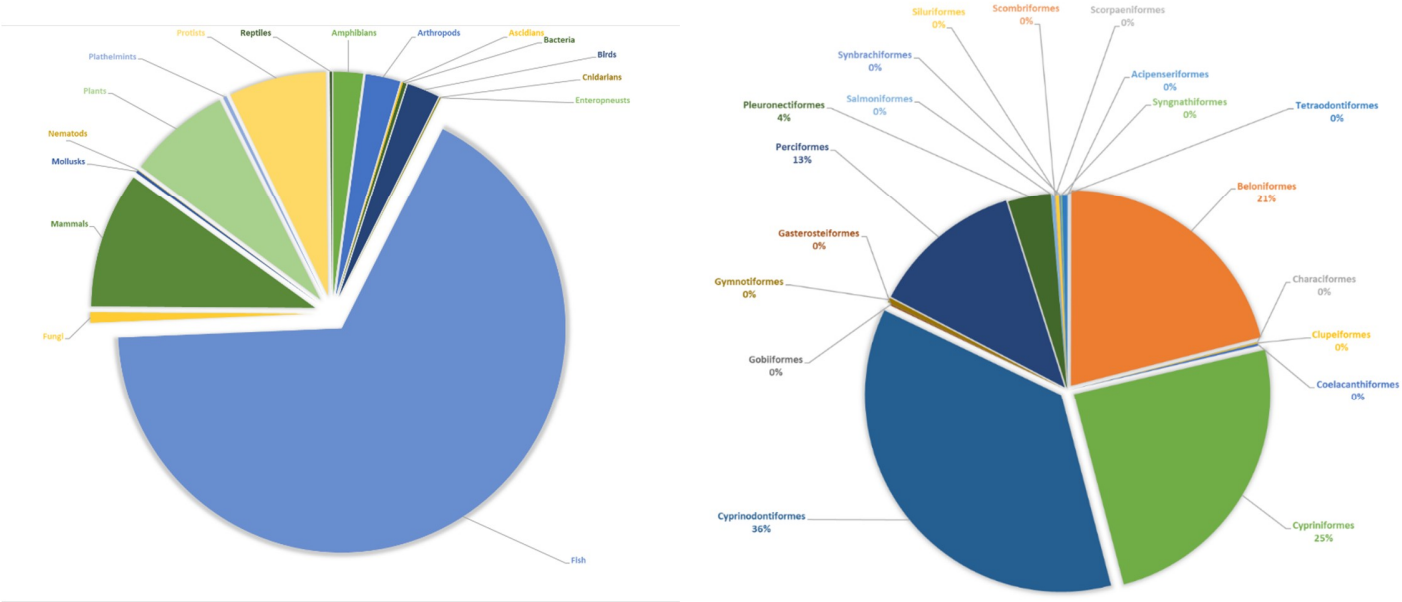

**Table S1.** AMOVA results.

| Source of variation                          | Sum of Squares | Variance components | Percentage of variation (%) |              |
|----------------------------------------------|----------------|---------------------|-----------------------------|--------------|
| <b>Among groups (FCT)</b>                    | 1,771.87       | 1.67                | 0.23 (***)                  | FCT : 0.0032 |
| <b>Among populations within groups (FSC)</b> | 761.41         | 0.72                | 0.10 (ns)                   | FSC : 0.0010 |
| <b>Within populations (FST)</b>              | 175,285.28     | 736.15              | 99.67 (***)                 | FST : 0.0023 |

\*\*\* P-value < 0.001. ns = no significances; Group 1 = PIL+FAH, Group 2 = HST, Group 3 = MAT.

**Table S2.** First generation migrants. The table above shows the percentage of first-generation migrants among sampling sites (first column) and their hypothetical site of origin based on the multilocus profile of each individual.

|            | SITE OF ORIGIN |       |       |       |
|------------|----------------|-------|-------|-------|
|            | PIL            | FAH   | HST   | MAT   |
| <b>PIL</b> | 11.43          | 25.71 | 45.71 | 17.14 |
| <b>FAH</b> | 29.03          | 12.9  | 35.48 | 22.58 |
| <b>HSS</b> | 38.89          | 27.78 | 16.67 | 16.67 |
| <b>MAT</b> | 32.35          | 26.47 | 32.35 | 8.82  |

**Table S3.** List of annotated hits and their corresponding human Uniprot accession numbers used for the enrichment analysis in DAVID 6.7.

| <b>N</b> | <b>ncbi accession number</b>                                                                             | <b>Method</b> | <b>Locus name</b>    | <b>Hits</b>                                                                                                                                                                                                                                                                                                                                                                                                                                                                                                                                                                                                                                                                                  | <b>UNIPROT (human*)</b>                        |
|----------|----------------------------------------------------------------------------------------------------------|---------------|----------------------|----------------------------------------------------------------------------------------------------------------------------------------------------------------------------------------------------------------------------------------------------------------------------------------------------------------------------------------------------------------------------------------------------------------------------------------------------------------------------------------------------------------------------------------------------------------------------------------------------------------------------------------------------------------------------------------------|------------------------------------------------|
| 1        | XM_022195682.1                                                                                           | L             | <b>S9991_599090</b>  | Acanthochromis polyacanthus multidrug resistance-associated protein 4-like (LOC110952229), mRNA                                                                                                                                                                                                                                                                                                                                                                                                                                                                                                                                                                                              | O15439<br>A0A2R8Y6V8<br>A0A2R8YDC1             |
| 2        | XM_022196756.1<br>XM_022196757.1                                                                         | B             | <b>S1073_18989</b>   | Acanthochromis polyacanthus PHD finger protein 20-like (LOC110952979), transcript variant X1, mRNA<br>Acanthochromis polyacanthus PHD finger protein 20-like (LOC110952979), transcript variant X2, mRNA                                                                                                                                                                                                                                                                                                                                                                                                                                                                                     | Q9BVI0                                         |
| 3        | XM_022193155.1<br>XM_022193156.1<br>XM_022193157.1                                                       | L + B         | <b>S9899_1841030</b> | Acanthochromis polyacanthus syntaxin-2-like (LOC110950537), transcript variant X1, mRNA<br>Acanthochromis polyacanthus syntaxin-2-like (LOC110950537), transcript variant X2, mRNA<br>Acanthochromis polyacanthus syntaxin-2-like (LOC110950537), transcript variant X3, mRNA                                                                                                                                                                                                                                                                                                                                                                                                                | J3KNU7<br>A0A348AY69                           |
| 4        | XM_019794196.1                                                                                           | H             | <b>S217_136844</b>   | Ailuropoda melanoleuca DEF6, guanine nucleotide exchange factor (DEF6), transcript variant X1, mRNA                                                                                                                                                                                                                                                                                                                                                                                                                                                                                                                                                                                          | Q9H4E7<br>Q01524<br>B3KSI1<br>D2DEF6<br>H0Y7V7 |
| 5        | XM_023266513.1<br>XM_023266514.1<br>XM_023266516.1<br>XM_023266517.1<br>XM_023266518.1<br>XM_023266519.1 | L             | <b>S124_317291</b>   | Amphiprion ocellaris Rho guanine nucleotide exchange factor 10 like (arhgef10l), transcript variant X1, mRNA<br>Amphiprion ocellaris Rho guanine nucleotide exchange factor 10 like (arhgef10l), transcript variant X2, mRNA<br>Amphiprion ocellaris Rho guanine nucleotide exchange factor 10 like (arhgef10l), transcript variant X3, mRNA<br>Amphiprion ocellaris Rho guanine nucleotide exchange factor 10 like (arhgef10l), transcript variant X4, mRNA<br>Amphiprion ocellaris Rho guanine nucleotide exchange factor 10 like (arhgef10l), transcript variant X5, mRNA<br>Amphiprion ocellaris Rho guanine nucleotide exchange factor 10 like (arhgef10l), transcript variant X6, mRNA | Q9HCE6<br>Q5VXI4<br>A0A2X0U2F8<br>A0A384DVK7   |
| 6        | XM_023282727.1<br>XM_023282735.1                                                                         | L + B         | <b>S9899_1841030</b> | Amphiprion ocellaris syntaxin-2-like (LOC111576815), transcript variant X1, mRNA<br>Amphiprion ocellaris syntaxin-2-like (LOC111576815), transcript variant X2, mRNA                                                                                                                                                                                                                                                                                                                                                                                                                                                                                                                         | J3KNU7<br>A0A348AY69                           |
| 7        | XM_016993454.1                                                                                           | L             | <b>S1_2422231</b>    | Anolis carolinensis synaptonemal complex protein 2 (LOC103278796), transcript variant X1, mRNA                                                                                                                                                                                                                                                                                                                                                                                                                                                                                                                                                                                               | Q9BX26                                         |

|    |                |   |                      |                                                                                                            |                                                                                      |
|----|----------------|---|----------------------|------------------------------------------------------------------------------------------------------------|--------------------------------------------------------------------------------------|
|    | XM_016993456.1 |   |                      | Anolis carolinensis synaptonemal complex protein 2 (LOC103278796), transcript variant X2, mRNA             |                                                                                      |
|    | XM_008110239.2 |   |                      | Anolis carolinensis synaptonemal complex protein 2 (LOC103278796), transcript variant X3, mRNA             |                                                                                      |
| 8  | KC161997.1     | B | <b>S8943_473</b>     | Anoplopoma fimbria follicle-stimulating hormone receptor mRNA, complete cds                                | C9JDA1<br>F8WBM4<br>B6UV79<br>A0A1S0QI99<br>B4DXB5<br>T2HV29<br>P23945<br>A0A1D5RMN4 |
| 9  | XM_012472993.1 | B | <b>S3317_962</b>     | Aotus nancymaae jade family PHD finger 1 (JADE1), transcript variant X1, mRNA                              | Q6IE81                                                                               |
|    | XM_012472994.1 |   |                      | Aotus nancymaae jade family PHD finger 1 (JADE1), transcript variant X2, mRNA                              | D6RFK0                                                                               |
|    | XM_012472995.1 |   |                      | Aotus nancymaae jade family PHD finger 1 (JADE1), transcript variant X3, mRNA                              | D6RGE7                                                                               |
|    | XM_012472996.1 |   |                      | Aotus nancymaae jade family PHD finger 1 (JADE1), transcript variant X4, mRNA                              | D6RC05<br>D6RCS1<br>D6RBB3<br>D6RAS5<br>D6RE74                                       |
| 10 | XM_009283779.2 | L | <b>S9853_2824879</b> | Aptenodytes forsteri Yip1 domain family member 4 (YIPF4), transcript variant X1, mRNA                      | Q9BSR8<br>H7C0D5<br>H7C3X2                                                           |
| 11 | XM_011580237.1 | L | <b>S9853_2824879</b> | Aquila chrysaetos canadensis ubiquitin specific peptidase 9, X-linked (USP9X), transcript variant X1, mRNA | Q93008                                                                               |
|    | XM_011580238.1 |   |                      | Aquila chrysaetos canadensis ubiquitin specific peptidase 9, X-linked (USP9X), transcript variant X2, mRNA |                                                                                      |
| 12 | XM_026145840.1 | B | <b>S8943_473</b>     | Astatotilapia calliptera NME/NM23 family member 9 (nme9), transcript variant X1, mRNA                      | Q86XW9                                                                               |
|    | XM_026145841.1 |   |                      | Astatotilapia calliptera NME/NM23 family member 9 (nme9), transcript variant X2, mRNA                      | Q3KNW3                                                                               |
|    | XM_026145842.1 |   |                      | Astatotilapia calliptera NME/NM23 family member 9 (nme9), transcript variant X3, mRNA                      | C9JXP5                                                                               |
|    | XM_026145843.1 |   |                      | Astatotilapia calliptera NME/NM23 family member 9 (nme9), transcript variant X4, mRNA                      | H7C5P8                                                                               |
|    | XM_026145844.1 |   |                      | Astatotilapia calliptera NME/NM23 family member 9 (nme9), transcript variant X5, mRNA                      | F8WDB2                                                                               |

|    |                                                                                                                            |       |                     |                                                                                                                                                                                                                                                                                                                                                                                                                                                                                                                                    | C9JPM2                               |
|----|----------------------------------------------------------------------------------------------------------------------------|-------|---------------------|------------------------------------------------------------------------------------------------------------------------------------------------------------------------------------------------------------------------------------------------------------------------------------------------------------------------------------------------------------------------------------------------------------------------------------------------------------------------------------------------------------------------------------|--------------------------------------|
| 13 | XM_026146628.1<br>XM_026146629.1                                                                                           | B     | <b>S561_8990</b>    | Astatotilapia calliptera potassium voltage-gated channel subfamily A member 1-like (LOC113008816), transcript variant X1, mRNA<br>Astatotilapia calliptera potassium voltage-gated channel subfamily A member 1-like (LOC113008816), transcript variant X2, mRNA                                                                                                                                                                                                                                                                   | Q09470                               |
| 14 | XM_026147420.1<br>XM_026166005.1<br>XM_026166006.1<br>XM_026172209.1<br>XM_026172212.1<br>XM_026172217.1<br>XM_026180011.1 | L     | <b>S533_118016</b>  | Astatotilapia calliptera putative nuclease HARBI1 (LOC113009226), mRNA<br>Astatotilapia calliptera putative nuclease HARBI1 (LOC113021367), mRNA<br>Astatotilapia calliptera putative nuclease HARBI1 (LOC113021368), mRNA<br>Astatotilapia calliptera putative nuclease HARBI1 (LOC113024845), mRNA<br>Astatotilapia calliptera putative nuclease HARBI1 (LOC113024847), mRNA<br>Astatotilapia calliptera putative nuclease HARBI1 (LOC113024914), mRNA<br>Astatotilapia calliptera putative nuclease HARBI1 (LOC113029242), mRNA | E9PQI1<br>E9PK24<br>Q96MB7           |
| 15 | XM_007238721.3<br>XM_007238723.3<br>XM_007238724.3<br>XM_007238725.3                                                       | B     | <b>S9888_703558</b> | Astyanax mexicanus voltage-dependent L-type calcium channel subunit beta-2 (LOC103035300), transcript variant X1, mRNA<br>Astyanax mexicanus voltage-dependent L-type calcium channel subunit beta-2 (LOC103035300), transcript variant X2, mRNA<br>Astyanax mexicanus voltage-dependent L-type calcium channel subunit beta-2 (LOC103035300), transcript variant X3, mRNA<br>Astyanax mexicanus voltage-dependent L-type calcium channel subunit beta-2 (LOC103035300), transcript variant X4, mRNA                               | Q08289                               |
| 16 | XM_026861766.1<br>XM_026861767.1<br>XM_026861768.1<br>XM_026861770.1<br>XM_026861771.1                                     | B     | <b>S8943_473</b>    | Athene cunicularia kinase suppressor of ras 1 (KSR1), transcript variant X1, mRNA<br>Athene cunicularia kinase suppressor of ras 1 (KSR1), transcript variant X2, mRNA<br>Athene cunicularia kinase suppressor of ras 1 (KSR1), transcript variant X3, mRNA<br>Athene cunicularia kinase suppressor of ras 1 (KSR1), transcript variant X5, mRNA<br>Athene cunicularia kinase suppressor of ras 1 (KSR1), transcript variant X6, mRNA                                                                                              | Q8IVT5                               |
| 17 | XM_026857421.1                                                                                                             | L     | <b>S885_89904</b>   | Athene cunicularia leucine rich repeat neuronal 1 (LRRN1), mRNA                                                                                                                                                                                                                                                                                                                                                                                                                                                                    | Q6UXK5                               |
| 18 | XM_014002131.1                                                                                                             | L     | <b>S124_317291</b>  | Austrofundulus limnaeus ArfGAP with coiled-coil, ankyrin repeat and PH domains 3 (acap3), transcript variant X4, mRNA                                                                                                                                                                                                                                                                                                                                                                                                              | Q96P50<br>Q8WTZ1<br>Q8N2W2<br>F8W850 |
| 19 | XM_014028472.1<br>XM_014028472.1                                                                                           | B + H | <b>S368_129091</b>  | Austrofundulus limnaeus exostosin-1-like (LOC106532427), partial mRNA<br>Austrofundulus limnaeus exostosin-1-like (LOC106532427), partial mRNA                                                                                                                                                                                                                                                                                                                                                                                     | D7RTA7<br>H7C1H6<br>S5Y321<br>V5QSK8 |

|    |                |       |                      |                                                                                            |            |
|----|----------------|-------|----------------------|--------------------------------------------------------------------------------------------|------------|
|    |                |       |                      |                                                                                            | T2FFJ4     |
|    |                |       |                      |                                                                                            | F8WF54     |
| 20 | XM_014008025.1 | L     | <b>S2711_3408</b>    | Austrofundulus limnaeus MAGUK p55 subfamily member 4-like (LOC106517273), mRNA             | A0A087WUS1 |
|    |                |       |                      |                                                                                            | E9PG92     |
|    |                |       |                      |                                                                                            | E7ET46     |
|    |                |       |                      |                                                                                            | E7EUL8     |
|    |                |       |                      |                                                                                            | R4GN59     |
|    |                |       |                      |                                                                                            | F6Q0Y6     |
|    |                |       |                      |                                                                                            | A2RU80     |
|    |                |       |                      |                                                                                            | B7ZM19     |
| 21 | XM_014003938.1 | B + H | <b>S368_129091</b>   | Austrofundulus limnaeus protein orai-2-like (LOC106514602), mRNA                           | Q96SN7     |
|    |                |       |                      |                                                                                            | C9J2H9     |
|    |                |       |                      |                                                                                            | C9JQR7     |
|    |                |       |                      |                                                                                            | C9JUY6     |
| 22 | XM_014026680.1 | B     | <b>S771_52821</b>    | Austrofundulus limnaeus suppression of tumorigenicity 5 (st5), transcript variant X1, mRNA | P78524     |
|    | XM_014026687.1 |       |                      | Austrofundulus limnaeus suppression of tumorigenicity 5 (st5), transcript variant X2, mRNA | B4DDL8     |
|    |                |       |                      |                                                                                            | E9PLH5     |
|    |                |       |                      |                                                                                            | H0YE59     |
|    |                |       |                      |                                                                                            | E9PKE0     |
| 23 | XM_014023439.1 | L + B | <b>S9899_1841030</b> | Austrofundulus limnaeus syntaxin 2 (stx2), mRNA                                            | J3KNU7     |
|    |                |       |                      |                                                                                            | A0A348AY69 |
| 24 | XM_014015995.1 | L + H | <b>S42_249281</b>    | Austrofundulus limnaeus thyrotropin-releasing hormone (trh), mRNA                          | P20396     |
| 25 | AB106676.1     | L     | <b>S178_234532</b>   | Avicennia marina EF1-A mRNA for elongation factor 1A, complete cds                         | P68104     |
|    |                |       |                      |                                                                                            | Q6IPS9     |
| 26 | KX758048.1     | L     | <b>S178_234532</b>   | Babesia microti Trx1 mRNA, complete cds                                                    | P32888     |
|    |                |       |                      |                                                                                            | P52348     |
| 27 | XM_019049716.1 | L     | <b>S1100_29850</b>   | Bemisia tabaci regulator of nonsense transcripts 2 (LOC109035898), mRNA                    | Q9HAU5     |
| 28 | XM_010850203.1 | H     | <b>S9889_2454843</b> | Bison bison bison ring finger protein 207 (RNF207), mRNA                                   | Q6ZRF8     |

|    |                              |   |                      |                                                                                                                                                                           |                                                                    |
|----|------------------------------|---|----------------------|---------------------------------------------------------------------------------------------------------------------------------------------------------------------------|--------------------------------------------------------------------|
| 29 | KM102660.1                   | L | <b>S9929_1038014</b> | Boleophthalmus pectinirostris heat shock protein 70 (hsp70) mRNA, complete cds                                                                                            | Q9NZL4<br>P0DMV8<br>P0DMV9                                         |
| 30 | NM_001252670.1               | L | <b>S1100_29850</b>   | Bombyx mori ubiquitin-conjugating enzyme E2 J1-like (LOC100852386), mRNA                                                                                                  | Q9Y385                                                             |
| 31 | BC153292.1                   | L | <b>S9929_1038014</b> | Bos taurus cytoplasmic polyadenylation element binding protein 4, mRNA (cDNA clone MGC:159945 IMAGE:8466970), complete cds                                                | B7ZLQ8<br>E5RFP2<br>E5RJM0<br>H0YBG1<br>D3DQM9<br>E1CJT3<br>Q17RY0 |
| 32 | NM_001098086.1               | L | <b>S9929_1038014</b> | Bos taurus eukaryotic translation initiation factor 2 alpha kinase 3 (EIF2AK3), mRNA                                                                                      | Q9NZJ5<br>E7ER02                                                   |
| 33 | NM_001083512.1               | L | <b>S9929_1038014</b> | Bos taurus KH RNA binding domain containing, signal transduction associated 3 (KHDRBS3), mRNA                                                                             | C9J185<br>E5RJZ9<br>H0YAQ1<br>O75525                               |
| 34 | NM_001080730.2<br>BC122667.1 | L | <b>S9929_1038014</b> | Bos taurus mitochondrial ribosomal protein L39 (MRPL39), mRNA<br>Bos taurus mitochondrial ribosomal protein L39, mRNA (cDNA clone MGC:142617 IMAGE:8253321), complete cds | Q9NYK5<br>C9JG87                                                   |
| 35 | BC123798.1                   | L | <b>S29_324875</b>    | Bos taurus sarcoglycan, alpha (50kDa dystrophin-associated glycoprotein), mRNA (cDNA clone MGC:143412 IMAGE:8286561), complete cds                                        | Q16586<br>A0A0S2Z4P8                                               |
| 36 | NM_001081531.2               | L | <b>S29_324875</b>    | Bos taurus small integral membrane protein 8 (SMIM8), mRNA                                                                                                                | Q96KF7<br>V9GYF9<br>V9GYL2                                         |
| 37 | XM_025857278.1               | L | <b>S897_124935</b>   | Callorhinus ursinus CRK like proto-oncogene, adaptor protein (CRKL), mRNA                                                                                                 | P46108                                                             |
| 38 | NM_001003140.1               | L | <b>S9929_1038014</b> | Canis lupus familiaris tight junction protein 1 (TJP1), mRNA                                                                                                              | G3V1L9<br>Q07157                                                   |
| 39 | XM_025457624.1               | B | <b>S3317_962</b>     | Canis lupus dingo ELAV like RNA binding protein 3 (ELAVL3), transcript variant X1, mRNA                                                                                   | Q14576                                                             |



|    |                |   |                      |                                                                                                                        |                                                                        |
|----|----------------|---|----------------------|------------------------------------------------------------------------------------------------------------------------|------------------------------------------------------------------------|
|    | XM_025457626.1 |   |                      | Canis lupus dingo ELAV like RNA binding protein 3 (ELAVL3), transcript variant X2, mRNA                                | Q96J71                                                                 |
|    | XM_025457627.1 |   |                      | Canis lupus dingo ELAV like RNA binding protein 3 (ELAVL3), transcript variant X3, mRNA                                | K7EPB5                                                                 |
| 40 | XM_005632851.3 | B | <b>S3317_962</b>     | Canis lupus familiaris ELAV like RNA binding protein 3 (ELAVL3), transcript variant X1, mRNA                           | Q9H024                                                                 |
|    | XM_022407022.1 |   |                      | Canis lupus familiaris ELAV like RNA binding protein 3 (ELAVL3), transcript variant X2, mRNA                           | L8E8Z0                                                                 |
|    | XM_005632852.3 |   |                      | Canis lupus familiaris ELAV like RNA binding protein 3 (ELAVL3), transcript variant X3, mRNA                           |                                                                        |
| 41 | XM_026288569.1 | L | <b>S9866_174755</b>  | Carassius auratus histone-lysine N-methyltransferase 2B-like (LOC113119259), mRNA                                      | Q9UMN6                                                                 |
| 42 | XM_026200903.1 | L | <b>S9853_2824879</b> | Carassius auratus Krueppel-like factor 6 (LOC113042235), mRNA                                                          | Q99612                                                                 |
| 43 | XM_026204651.1 | L | <b>S9853_2824879</b> | Carassius auratus monocyte to macrophage differentiation factor 2-like (LOC113044565), transcript variant X3, mRNA     | Q8IY49                                                                 |
|    | XR_003275882.1 |   |                      | Carassius auratus monocyte to macrophage differentiation factor 2-like (LOC113044565), transcript variant X4, misc_RNA | L0R6K8                                                                 |
| 44 | XM_026254993.1 | L | <b>S9951_65613</b>   | Carassius auratus tRNA pseudouridine(38/39) synthase-like (LOC113084860), transcript variant X3, mRNA                  | Q9BZE2<br>E9PNY6<br>E9PRI9                                             |
| 45 | XM_026229009.1 | L | <b>S9966_92994</b>   | Carassius auratus zyxin-like (LOC113060145), transcript variant X1, mRNA                                               | Q15942                                                                 |
|    | XM_026229010.1 |   |                      | Carassius auratus zyxin-like (LOC113060145), transcript variant X2, mRNA                                               |                                                                        |
| 46 | EU693901.1     | L | <b>S124_317291</b>   | Channa argus rhamnose-binding lectin (RBL) gene, promoter region and complete cds                                      | B3KWG0                                                                 |
| 47 | XM_017498060.1 | H | <b>S217_136844</b>   | Cebus capucinus imitator aspartate beta-hydroxylase domain containing 2 (ASPHD2), transcript variant X1, mRNA          | A0A024R1D0                                                             |
|    | XM_017498061.1 |   |                      | Cebus capucinus imitator aspartate beta-hydroxylase domain containing 2 (ASPHD2), transcript variant X2, mRNA          | Q6ICH7                                                                 |
| 48 | XM_023373558.1 | L | <b>S885_89904</b>    | Centruroides sculpturatus ras-related protein M-Ras-like (LOC111629674), mRNA                                          | O14807                                                                 |
| 49 | XM_010121678.1 | L | <b>S9966_92994</b>   | Chlamydotis macqueenii zinc finger protein 800 (ZNF800), mRNA                                                          | Q2TB10<br>A0A087WXB4<br>Q49A13<br>C9JHX9<br>C9K0M9<br>C9JLY3<br>Q4G0T8 |
| 50 | XM_014406203.2 | L | <b>S885_89904</b>    | Cimex lectularius FYVE, RhoGEF and PH domain-containing protein 4-like (LOC106673856), mRNA                            | Q96M96                                                                 |
| 51 | XM_015858645.1 | B | <b>S8943_473</b>     | Coturnix japonica BEN domain containing 3 (BEND3), transcript variant X1, mRNA                                         | Q5T5X7                                                                 |

|    |                |       |                            |                                                                                                                         |                                                                    |
|----|----------------|-------|----------------------------|-------------------------------------------------------------------------------------------------------------------------|--------------------------------------------------------------------|
|    | XM_015858647.1 |       |                            | Coturnix japonica BEN domain containing 3 (BEND3), transcript variant X2, mRNA                                          |                                                                    |
|    | XM_015858648.1 |       |                            | Coturnix japonica BEN domain containing 3 (BEND3), transcript variant X3, mRNA                                          |                                                                    |
|    | XM_015858649.1 |       |                            | Coturnix japonica BEN domain containing 3 (BEND3), transcript variant X4, mRNA                                          |                                                                    |
| 52 | AY551097.1     | L     | <b>S9853_2824879</b>       | Crassostrea gigas fatty acid binding protein mRNA, complete cds                                                         | P05413<br>Q01469<br>P12104<br>O15540<br>P07148<br>P15090<br>P51161 |
| 53 | XM_023918766.1 | L     | <b>S897_124935</b>         | Cyanistes caeruleus GATA binding protein 3 (GATA3), transcript variant X1, mRNA                                         | P23771                                                             |
|    | XM_023918767.1 |       |                            | Cyanistes caeruleus GATA binding protein 3 (GATA3), transcript variant X2, mRNA                                         | A0A2R8Y4T2                                                         |
|    | XM_023918768.1 |       |                            | Cyanistes caeruleus GATA binding protein 3 (GATA3), transcript variant X3, mRNA                                         | A0A2R8Y2A9                                                         |
| 54 | XM_015375577.1 | L     | <b>S10010_101246<br/>6</b> | Cyprinodon variegatus acetoacetyl-CoA synthetase (aacs), mRNA                                                           | Q86V21<br>A0A024RBV2<br>E7EW25<br>Q49AJ4<br>L8ECK1                 |
| 55 | XM_015394546.1 | L     | <b>S174_3611515</b>        | Cyprinodon variegatus AT-rich interactive domain-containing protein 3B-like (LOC107097412), transcript variant X1, mRNA | H3BQ92                                                             |
|    | XM_015394547.1 |       |                            | Cyprinodon variegatus AT-rich interactive domain-containing protein 3B-like (LOC107097412), transcript variant X2, mRNA | Q99856                                                             |
|    | XM_015394549.1 |       |                            | Cyprinodon variegatus AT-rich interactive domain-containing protein 3B-like (LOC107097412), transcript variant X3, mRNA | Q81VW6                                                             |
|    | XM_015394550.1 |       |                            | Cyprinodon variegatus AT-rich interactive domain-containing protein 3B-like (LOC107097412), transcript variant X4, mRNA |                                                                    |
| 56 | XM_015396192.1 | B + H | <b>S368_129091</b>         | Cyprinodon variegatus calcium binding protein 2 (cabp2), mRNA                                                           | Q9NPB3<br>A0A1B0GW24<br>F1T0K2<br>F5H458                           |
| 57 | XM_015380986.1 | L + B | <b>S9884_420423</b>        | Cyprinodon variegatus centrosomal protein 63kDa (cep63), mRNA                                                           | Q96MT8                                                             |
| 58 | XM_015372153.1 | L     | <b>S844_58960</b>          | Cyprinodon variegatus cytochrome P450 2K4-like (LOC107083153), transcript variant X1, mRNA                              | A0A146Y2K4                                                         |

|    |                |       |                                  |                                                                                                                                    |                                              |
|----|----------------|-------|----------------------------------|------------------------------------------------------------------------------------------------------------------------------------|----------------------------------------------|
| 59 | XM_015395499.1 | L     | <b>S9991_599077</b>              | Cyprinodon variegatus gastrula zinc finger protein XICGF57.1-like (LOC107098061), mRNA                                             | Q9H9H3                                       |
| 60 | XM_015383039.1 | B + H | <b>S368_129091</b>               | Cyprinodon variegatus guanine nucleotide binding protein (G protein), beta polypeptide 1-like (gnb1l), transcript variant X1, mRNA | Q9BYB4                                       |
|    | XM_015383040.1 |       |                                  | Cyprinodon variegatus guanine nucleotide binding protein (G protein), beta polypeptide 1-like (gnb1l), transcript variant X2, mRNA | C9JPQ6                                       |
|    | XM_015383041.1 |       |                                  | Cyprinodon variegatus guanine nucleotide binding protein (G protein), beta polypeptide 1-like (gnb1l), transcript variant X3, mRNA | -                                            |
| 61 | XM_015393779.1 | L     | <b>S7079_1123</b>                | Cyprinodon variegatus junctional adhesion molecule B-like (LOC107096894), mRNA                                                     | P57087                                       |
|    | XM_015399137.1 |       |                                  | Cyprinodon variegatus junctional adhesion molecule B-like (LOC107100593), mRNA                                                     | Q9BX67                                       |
| 62 | XM_015376787.1 | B     | <b>S9889_1518953</b>             | Cyprinodon variegatus membrane-associated phosphatidylinositol transfer protein 2-like (LOC107086052), mRNA                        | Q9BZ72                                       |
| 63 | XM_015399020.1 | H     | <b>S1024_14784</b>               | Cyprinodon variegatus microtubule associated protein 1S (map1s), mRNA                                                              | Q66K74                                       |
| 64 | XM_015394625.1 | L     | <b>S703_83370</b>                | Cyprinodon variegatus microtubule associated protein 6 (map6), transcript variant X3, mRNA                                         | Q96JE9                                       |
| 65 | XM_015374902.1 | L     | <b>S703_83370</b>                | Cyprinodon variegatus nesprin-2-like (LOC107084854), mRNA                                                                          | Q8WXH0<br>A0A0C4DGK3<br>A0A0A0MRE3<br>G3V5X4 |
| 66 | XM_015401906.1 | L     | <b>S703_83370</b>                | Cyprinodon variegatus potassium channel subfamily K member 5-like (LOC107102543), mRNA                                             | O95279<br>A0A024RD32<br>A0A0B6VPR3           |
| 67 | XM_015368897.1 | L     | <b>S2023_14478</b>               | Cyprinodon variegatus protein NLRC3-like (LOC107080691), mRNA                                                                      | Q7RTR2                                       |
| 68 | XM_015378696.1 | L     | <b>S10010_101246</b><br><b>6</b> | Cyprinodon variegatus ribonucleoprotein, PTB-binding 2 (raver2), mRNA                                                              | Q9HCJ3<br>E9PE10                             |
| 69 | XM_015370037.1 | L + B | <b>S9899_1841030</b>             | Cyprinodon variegatus syntaxin 2 (stx2), mRNA                                                                                      | P32856                                       |
| 70 | XM_015400128.1 | H     | <b>S10016_468136</b>             | Cyprinodon variegatus TBC1 domain family member 25 (tbc1d25), transcript variant X1, mRNA                                          | Q3MII6                                       |
|    | XM_015400129.1 |       |                                  | Cyprinodon variegatus TBC1 domain family member 25 (tbc1d25), transcript variant X2, mRNA                                          |                                              |
| 71 | XM_015376231.1 | L     | <b>S844_58960</b>                | Cyprinodon variegatus wolframin-like (LOC107085724), transcript variant X1, mRNA                                                   | O76024                                       |
|    | XM_015376232.1 |       |                                  | Cyprinodon variegatus wolframin-like (LOC107085724), transcript variant X2, mRNA                                                   | A0A0S2Z4V6                                   |
|    | XM_015376233.1 |       |                                  | Cyprinodon variegatus wolframin-like (LOC107085724), transcript variant X3, mRNA                                                   | H0Y9G5<br>A0A0E3H6T4                         |

|    |                |   |                      |                                                                                                                                   |            |
|----|----------------|---|----------------------|-----------------------------------------------------------------------------------------------------------------------------------|------------|
|    |                |   |                      |                                                                                                                                   | B4DJ99     |
|    |                |   |                      |                                                                                                                                   | X2CT56     |
| 72 | XM_015374425.1 | L | <b>S844_58956</b>    | Cyprinodon variegatus X-ray repair complementing defective repair in Chinese hamster cells 4 (xrcc4), transcript variant X2, mRNA | Q13426     |
|    |                |   |                      |                                                                                                                                   | A0A024RAP0 |
|    |                |   |                      |                                                                                                                                   | A0A024RAL0 |
|    |                |   |                      |                                                                                                                                   | A0A024RAQ8 |
| 73 | XM_015391306.1 | B | <b>S1073_18989</b>   | Cyprinodon variegatus zinc finger protein 883-like (LOC107095288), mRNA                                                           | Q96MB7     |
| 74 | XM_003199319.5 | L | <b>S897_124935</b>   | Danio rerio long-chain fatty acid transport protein 6-like (LOC568883), transcript variant X1, mRNA                               | Q9Y2P4     |
| 75 | XR_002459143.1 | L | <b>S10156_378391</b> | Danio rerio meiosis-specific nuclear structural 1 (mns1), transcript variant X1, misc_RNA                                         | Q8NEH6     |
|    | XR_002459144.1 |   |                      | Danio rerio meiosis-specific nuclear structural 1 (mns1), transcript variant X2, misc_RNA                                         | B3KQ70     |
| 76 | BC168467.1     | B | <b>S3317_962</b>     | Danio rerio actin, alpha 1, skeletal muscle, mRNA (cDNA clone MGC:172132 IMAGE:8000653), complete cds                             | P68133     |
|    | BC065435.1     |   |                      | Danio rerio actin, alpha 1, skeletal muscle, mRNA (cDNA clone MGC:77653 IMAGE:6997034), complete cds                              |            |
| 77 | NM_001080579.1 | L | <b>S897_124935</b>   | Danio rerio ArfGAP with coiled-coil, ankyrin repeat and PH domains 1 (acap1), mRNA                                                | Q15027     |
|    |                |   |                      |                                                                                                                                   | I3L0K9     |
|    |                |   |                      |                                                                                                                                   | I3L268     |
| 78 | BC077086.1     | L | <b>S9929_1038014</b> | Danio rerio ATG5 autophagy related 5 homolog (S. cerevisiae), mRNA (cDNA clone MGC:100934 IMAGE:7145909), complete cds            |            |
| 79 | NM_194398.2    | L | <b>S178_234532</b>   | Danio rerio BCL2 like 10 (bcl2l10), mRNA                                                                                          | Q9HD36     |
|    |                |   |                      |                                                                                                                                   | HOYMD5     |
| 80 | NM_001040328.1 | L | <b>S885_89904</b>    | Danio rerio LCK proto-oncogene, Src family tyrosine kinase (lck), transcript variant 2, mRNA                                      | P06239     |
| 81 | BC064299.1     | L | <b>S9929_1038014</b> | Danio rerio proliferating cell nuclear antigen, mRNA (cDNA clone MGC:77707 IMAGE:7000501), complete cds                           | P12004     |
| 82 | NM_200324.1    | L | <b>S9853_2824879</b> | Danio rerio unconventional SNARE in the ER 1 homolog (S. cerevisiae) (use1), mRNA                                                 | Q9NZ43     |
| 83 | XM_004472646.2 | L | <b>S9929_1038014</b> | Dasyatis novemcinctus transmembrane protein 150C (TMEM150C), transcript variant X1, mRNA                                          | B9EJG8     |
|    | XM_012530686.2 |   |                      | Dasyatis novemcinctus transmembrane protein 150C (TMEM150C), transcript variant X2, mRNA                                          | D6RAQ9     |
|    | XM_012530685.2 |   |                      | Dasyatis novemcinctus transmembrane protein 150C (TMEM150C), transcript variant X3, mRNA                                          | D6RDW6     |
|    | XM_023582847.1 |   |                      | Dasyatis novemcinctus transmembrane protein 150C (TMEM150C), transcript variant X4, mRNA                                          |            |
|    | XM_012530687.2 |   |                      | Dasyatis novemcinctus transmembrane protein 150C (TMEM150C), transcript variant X5, mRNA                                          |            |
| 84 | XM_014618888.1 | L | <b>S897_124935</b>   | Dinoponera quadriceps splicing factor 3B subunit 3 (LOC106744262), transcript variant X1, mRNA                                    | Q15393     |

|    |                |   |                      |                                                                                                                           |                                                                        |
|----|----------------|---|----------------------|---------------------------------------------------------------------------------------------------------------------------|------------------------------------------------------------------------|
|    | XM_014618897.1 |   |                      | Dinoponera quadriceps splicing factor 3B subunit 3 (LOC106744262), transcript variant X2, mRNA                            |                                                                        |
| 85 | XM_026115261.1 | L | <b>S9853_2824879</b> | Dromaius novaehollandiae probable ubiquitin carboxyl-terminal hydrolase FAF-X (LOC112992287), transcript variant X1, mRNA | Q93008                                                                 |
|    | XM_026115262.1 |   |                      | Dromaius novaehollandiae probable ubiquitin carboxyl-terminal hydrolase FAF-X (LOC112992287), transcript variant X2, mRNA |                                                                        |
| 86 | XM_026104388.1 | L | <b>S9966_776829</b>  | Dromaius novaehollandiae tubby bipartite transcription factor (TUB), transcript variant X1, mRNA                          | P50607                                                                 |
|    | XM_026104389.1 |   |                      | Dromaius novaehollandiae tubby bipartite transcription factor (TUB), transcript variant X2, mRNA                          |                                                                        |
|    | XM_026104390.1 |   |                      | Dromaius novaehollandiae tubby bipartite transcription factor (TUB), transcript variant X3, mRNA                          |                                                                        |
|    | XM_026104391.1 |   |                      | Dromaius novaehollandiae tubby bipartite transcription factor (TUB), transcript variant X4, mRNA                          |                                                                        |
|    | XM_026104392.1 |   |                      | Dromaius novaehollandiae tubby bipartite transcription factor (TUB), transcript variant X5, mRNA                          |                                                                        |
|    | XM_026104393.1 |   |                      | Dromaius novaehollandiae tubby bipartite transcription factor (TUB), transcript variant X6, mRNA                          |                                                                        |
| 87 | XM_027007299.1 | L | <b>S9866_174755</b>  | Electrophorus electricus zinc finger protein 423-like (LOC113575680), transcript variant X1, mRNA                         | Q2M1K9                                                                 |
|    | XM_027007300.1 |   |                      | Electrophorus electricus zinc finger protein 423-like (LOC113575680), transcript variant X2, mRNA                         |                                                                        |
|    | XM_027007301.1 |   |                      | Electrophorus electricus zinc finger protein 423-like (LOC113575680), transcript variant X3, mRNA                         |                                                                        |
|    | XM_027007302.1 |   |                      | Electrophorus electricus zinc finger protein 423-like (LOC113575680), transcript variant X4, mRNA                         |                                                                        |
|    | XM_027007303.1 |   |                      | Electrophorus electricus zinc finger protein 423-like (LOC113575680), transcript variant X5, mRNA                         |                                                                        |
|    | XM_027007304.1 |   |                      | Electrophorus electricus zinc finger protein 423-like (LOC113575680), transcript variant X6, mRNA                         |                                                                        |
| 88 | GU984383.1     | L | <b>S9929_1038014</b> | Epinephelus bruneus kisspeptin (KiSS2) mRNA, complete cds                                                                 | Q15726<br>A0A0D9SES6                                                   |
| 89 | AF124051.1     | L | <b>S124_317291</b>   | Fugu rubripes double stranded RNA adenosine deaminase RED2 gene, partial cds                                              | Q9NS39                                                                 |
| 90 | AF079311.1     | B | <b>S9885_35456</b>   | Fundulus heteroclitus aryl hydrocarbon receptor nuclear translocator 2 (ARNT2) mRNA, complete cds                         | Q9HBZ2                                                                 |
|    | NM_001309983.1 |   |                      | Fundulus heteroclitus aryl hydrocarbon receptor nuclear translocator 2 (arnt2), mRNA                                      | X5DQN9<br>A0A087WVE9<br>Q86TN1<br>X5DP31<br>X5DP40<br>X5D7T2<br>X5D9H9 |

|     |                |       |                      |                                                                                                                   |            |
|-----|----------------|-------|----------------------|-------------------------------------------------------------------------------------------------------------------|------------|
|     |                |       |                      |                                                                                                                   | X5DRE4     |
|     |                |       |                      |                                                                                                                   | H0YKW1     |
|     |                |       |                      |                                                                                                                   | X5D8U0     |
|     |                |       |                      |                                                                                                                   | X5DP87     |
| 91  | KM236111.1     | B     | <b>S10045_80975</b>  | Fundulus heteroclitus estrogen receptor alpha (esr1) gene, complete cds                                           | G4XH65     |
|     |                |       |                      |                                                                                                                   | P03372     |
|     |                |       |                      |                                                                                                                   | E5G0W7     |
| 92  | XM_021323058.1 | B + H | <b>S368_129091</b>   | Fundulus heteroclitus ankyrin repeat domain 52 (ankrd52), mRNA                                                    | Q8NB46     |
|     |                |       |                      |                                                                                                                   | L8EAS5     |
| 93  | XM_012859214.2 | L     | <b>S132_473992</b>   | Fundulus heteroclitus B-cell receptor CD22-like (LOC105923314), mRNA                                              | P20273     |
| 94  | XM_021315295.1 | H     | <b>S9951_762061</b>  | Fundulus heteroclitus biotinidase-like (LOC105924216), mRNA                                                       | P43251     |
| 95  | XM_021323537.1 | L     | <b>S470_275634</b>   | Fundulus heteroclitus bone morphogenetic protein receptor type-2-like (LOC105935861), transcript variant X1, mRNA | Q13873     |
|     | XM_021323538.1 |       |                      | Fundulus heteroclitus bone morphogenetic protein receptor type-2-like (LOC105935861), transcript variant X2, mRNA |            |
|     | XM_021323539.1 |       |                      | Fundulus heteroclitus bone morphogenetic protein receptor type-2-like (LOC105935861), transcript variant X3, mRNA |            |
| 96  | XM_021318945.1 | L     | <b>S470_275634</b>   | Fundulus heteroclitus C-Jun-amino-terminal kinase-interacting protein 1-like (LOC105929632), partial mRNA         | Q9UQF2     |
| 97  | XM_021322757.1 | H     | <b>S10108_580435</b> | Fundulus heteroclitus calcium dependent secretion activator 2 (cadps2), mRNA                                      | Q86UW7     |
|     |                |       |                      |                                                                                                                   | C9IYE1     |
|     |                |       |                      |                                                                                                                   | A0A087X1P3 |
|     |                |       |                      |                                                                                                                   | F8W8P5     |
|     |                |       |                      |                                                                                                                   | H0Y8B5     |
| 98  | XM_021312860.1 | L + B | <b>S1691_12502</b>   | Fundulus heteroclitus carcinoembryonic antigen-related cell adhesion molecule 1-like (LOC110367333), mRNA         | P13688     |
| 99  | XM_021309557.1 | B     | <b>S9856_2465434</b> | Fundulus heteroclitus cationic amino acid transporter 3 (LOC105916243), mRNA                                      | Q8WY07     |
| 100 | XM_021308469.1 | L     | <b>S470_275634</b>   | Fundulus heteroclitus cerebellar degeneration-related protein 2-like (LOC105939930), transcript variant X1, mRNA  | P52569     |
|     | XM_021308470.1 |       |                      | Fundulus heteroclitus cerebellar degeneration-related protein 2-like (LOC105939930), transcript variant X2, mRNA  |            |
| 101 | XM_012859882.2 | L     | <b>S470_275634</b>   | Fundulus heteroclitus cholinesterase 1-like (LOC105923969), mRNA                                                  | P06276     |
| 102 | XM_012855450.2 | B     | <b>S4919_3133</b>    | Fundulus heteroclitus cold shock domain-containing protein C2-like (LOC105919973), transcript variant X2, mRNA    | Q9Y534     |
|     |                |       |                      |                                                                                                                   | H7C4E7     |

|     |                |   |                           |                                                                                                                        |                                                              |
|-----|----------------|---|---------------------------|------------------------------------------------------------------------------------------------------------------------|--------------------------------------------------------------|
| 103 | XM_021313000.1 | L | <b>S10103_490931</b>      | Fundulus heteroclitus contactin-associated protein-like 2 (LOC105920987), mRNA                                         | Q9UHC6<br>Q02246                                             |
| 104 | XM_012862948.2 | H | <b>S105_467399</b>        | Fundulus heteroclitus cytochrome P450 2P2 (LOC105926571), mRNA                                                         | Q9PTR2                                                       |
| 105 | XM_012859139.2 | L | <b>S703_83370</b>         | Fundulus heteroclitus DEAD-box helicase 51 (ddx51), mRNA                                                               | Q8N8A6<br>F1T0L5                                             |
| 106 | XM_012851665.2 | L | <b>S216_297421</b>        | Fundulus heteroclitus dehydrogenase/reductase SDR family member 11-like (LOC105916998), mRNA                           | Q6UWP2                                                       |
| 107 | XM_021321046.1 | L | <b>S470_275634</b>        | Fundulus heteroclitus discoidin domain receptor tyrosine kinase 2 (ddr2), mRNA                                         | Q16832<br>A0A024R906<br>Q5T244<br>Q5T245<br>Q5T241<br>H0Y570 |
| 108 | XM_012875545.2 | L | <b>S470_275634</b>        | Fundulus heteroclitus dishevelled segment polarity protein 1 (dvl1), mRNA                                              | O14640<br>P54792<br>Q5IS48                                   |
| 109 | XM_012868134.2 | B | <b>S4919_3133</b>         | Fundulus heteroclitus endothelial cell adhesion molecule (esam), mRNA                                                  | Q96AP7<br>F8WDW9<br>C9JIE7                                   |
| 110 | XR_002428333.1 | B | <b>S60_401521</b>         | Fundulus heteroclitus erbb2 interacting protein (erbin), transcript variant X6, misc_RNA                               | Q96RT1<br>B4DIP2<br>H0YA04<br>H0Y9E8                         |
| 111 | XM_021312271.1 | L | <b>S803_137883</b>        | Fundulus heteroclitus filamin A interacting protein 1 like (filip1l), transcript variant X7, mRNA                      | P21333                                                       |
|     | XM_021312272.1 |   |                           | Fundulus heteroclitus filamin A interacting protein 1 like (filip1l), transcript variant X8, mRNA                      |                                                              |
| 112 | XM_012862948   | H | <b>S105_467399</b>        | PREDICTED: Fundulus heteroclitus cytochrome P450 2F2 (LOC105926571), mRNA                                              | A0A0U1RPL9                                                   |
| 113 | XM_021322207.1 | L | <b>S470_275634</b>        | Fundulus heteroclitus FYVE, RhoGEF and PH domain-containing protein 6-like (LOC105934005), transcript variant X1, mRNA | Q6ZV73                                                       |
|     | XM_012873812.2 |   |                           | Fundulus heteroclitus FYVE, RhoGEF and PH domain-containing protein 6-like (LOC105934005), transcript variant X2, mRNA |                                                              |
| 114 | XM_012876512.2 | L | <b>S10116_181333</b><br>2 | Fundulus heteroclitus G protein subunit beta 1 like (gnb1l), transcript variant X1, mRNA                               | C9JPQ6                                                       |

|     |                |   |                      |                                                                                                                   |            |
|-----|----------------|---|----------------------|-------------------------------------------------------------------------------------------------------------------|------------|
|     | XM_012876593.2 |   |                      | Fundulus heteroclitus G protein subunit beta 1 like (gnb1l), transcript variant X2, mRNA                          | Q9BYB4     |
|     |                |   | <b>S10116_181333</b> |                                                                                                                   |            |
| 115 | XM_021310258.1 | L | <b>2</b>             | Fundulus heteroclitus G-patch domain containing 2 like (gpatch2l), mRNA                                           | Q9NWQ4     |
| 116 | XM_021320139.1 | L | <b>S470_275634</b>   | Fundulus heteroclitus gamma-glutamyl hydrolase (ggh), mRNA                                                        | Q92820     |
| 117 | XM_021307273.1 | L | <b>S897_124935</b>   | Fundulus heteroclitus gap junction protein alpha 5 (gja5), transcript variant X1, mRNA                            | P36382     |
|     | XM_021307274.1 |   |                      | Fundulus heteroclitus gap junction protein alpha 5 (gja5), transcript variant X2, mRNA                            | A0A0B4J1Y3 |
| 118 | XM_012873286.2 | L | <b>S470_275634</b>   | Fundulus heteroclitus glycerate kinase (glyctk), transcript variant X1, mRNA                                      | Q8IVS8     |
|     | XM_021321928.1 |   |                      | Fundulus heteroclitus glycerate kinase (glyctk), transcript variant X2, mRNA                                      | C9JA32     |
|     | XM_021321929.1 |   |                      | Fundulus heteroclitus glycerate kinase (glyctk), transcript variant X3, mRNA                                      | C9J3N5     |
|     |                |   |                      |                                                                                                                   | A0A024R302 |
|     |                |   |                      |                                                                                                                   | A0A0C4DGA0 |
| 119 | XM_012859274.2 | L | <b>S9949_35040</b>   | Fundulus heteroclitus glycine N-acyltransferase-like protein (LOC105923351), mRNA                                 | Q6IB77     |
|     |                |   | <b>S10116_181333</b> |                                                                                                                   |            |
| 120 | XM_012874883.2 | L | <b>2</b>             | Fundulus heteroclitus glycosyltransferase 8 domain containing 1 (glt8d1), mRNA                                    | Q68CQ7     |
|     |                |   |                      |                                                                                                                   | C9J6X9     |
|     |                |   |                      |                                                                                                                   | C9J880     |
|     |                |   |                      |                                                                                                                   | A0A024R313 |
|     |                |   |                      |                                                                                                                   | C9JPK4     |
|     |                |   |                      |                                                                                                                   | C9JY96     |
|     |                |   |                      |                                                                                                                   | C9JNB0     |
|     |                |   |                      |                                                                                                                   | H7C4V6     |
| 121 | XM_021314526.1 | H | <b>S9860_2518005</b> | Fundulus heteroclitus Golgi apparatus protein 1-like (LOC105923080), transcript variant X1, mRNA                  | Q92896     |
| 122 | XM_021316556.1 | H | <b>S9867_2151582</b> | Fundulus heteroclitus golgin subfamily A member 6-like protein 22 (LOC110368556), transcript variant X1, mRNA     | H0YM25     |
|     | XM_021316557.1 |   |                      | Fundulus heteroclitus golgin subfamily A member 6-like protein 22 (LOC110368556), transcript variant X2, mRNA     |            |
|     | XR_002428179.1 |   |                      | Fundulus heteroclitus golgin subfamily A member 6-like protein 22 (LOC110368556), transcript variant X3, misc_RNA |            |
|     | XR_002428180.1 |   |                      | Fundulus heteroclitus golgin subfamily A member 6-like protein 22 (LOC110368556), transcript variant X4, misc_RNA |            |
| 123 | XM_021307115.1 | L | <b>S124_317291</b>   | Fundulus heteroclitus GTPase IMAP family member 4-like (LOC105938037), mRNA                                       | Q9NUV9     |
|     | XM_021310815.1 |   |                      | Fundulus heteroclitus GTPase IMAP family member 4-like (LOC110366389), mRNA                                       |            |
| 124 | XM_021313941.1 | L | <b>S470_275634</b>   | Fundulus heteroclitus helicase with zinc finger 2 (helz2), mRNA                                                   | Q9BYK8     |
| 125 | XM_012873760.2 | L | <b>S470_275634</b>   | Fundulus heteroclitus high affinity choline transporter 1-like (LOC105933966), mRNA                               | Q9GZV3     |



|     |                                                    |       |                           |                                                                                                                                                                                                                                                    |                                                                                  |
|-----|----------------------------------------------------|-------|---------------------------|----------------------------------------------------------------------------------------------------------------------------------------------------------------------------------------------------------------------------------------------------|----------------------------------------------------------------------------------|
| 126 | XM_021320128.1                                     | L     | <b>S10116_181333</b><br>2 | Fundulus heteroclitus IKBKB interacting protein (ikbip), transcript variant X1, mRNA                                                                                                                                                               | Q70UQ0                                                                           |
| 127 | XM_012867057.2                                     | L     | <b>S9941_4782742</b>      | Fundulus heteroclitus insulin receptor substrate 1-B-like (LOC105929332), transcript variant X2, mRNA                                                                                                                                              | P06213                                                                           |
| 128 | XM_021317315.1                                     | L     | <b>S10116_181333</b><br>2 | Fundulus heteroclitus interleukin-17 receptor C (LOC105927307), mRNA                                                                                                                                                                               | Q8NAC3                                                                           |
| 129 | XM_012854238.2                                     | L     | <b>S10116_181333</b><br>2 | Fundulus heteroclitus JNK1/MAPK8-associated membrane protein (jkamp), mRNA                                                                                                                                                                         | Q9P055<br>G3V2M4<br>A0A087WVY6<br>G3V4D0<br>G3V2R2<br>G3V372                     |
| 130 | XM_012865461.2<br>XM_021318032.1                   | L     | <b>S10116_181333</b><br>2 | Fundulus heteroclitus kelch like family member 5 (klh5), transcript variant X1, mRNA<br>Fundulus heteroclitus kelch like family member 5 (klh5), transcript variant X2, mRNA                                                                       | Q96PQ7<br>H0Y9Y5<br>H0YAF6<br>Q7Z6D5<br>Q6PD75<br>Q642I3<br>A0A024R9V8<br>L8E8A1 |
| 131 | XM_012866162.2                                     | H     | <b>S10108_580435</b>      | Fundulus heteroclitus kynurenine aminotransferase 1 (kyat1), mRNA                                                                                                                                                                                  | Q16773<br>B7Z4W5<br>Q5T276<br>Q5T278                                             |
| 132 | XM_021310058.1<br>XM_021310059.1<br>XM_012851561.2 | L     | <b>S470_275634</b>        | Fundulus heteroclitus lamin-A-like (LOC105916913), transcript variant X1, mRNA<br>Fundulus heteroclitus lamin-A-like (LOC105916913), transcript variant X2, mRNA<br>Fundulus heteroclitus lamin-A-like (LOC105916913), transcript variant X3, mRNA | P02545                                                                           |
| 133 | XM_012877853.2                                     | L     | <b>S470_275634</b>        | Fundulus heteroclitus lipoprotein lipase-like (LOC105936851), mRNA                                                                                                                                                                                 | P06858                                                                           |
| 134 | XM_012854276.2                                     | L     | <b>S470_275634</b>        | Fundulus heteroclitus malignant fibrous histiocytoma amplified sequence 1 (mhas1), transcript variant X1, mRNA                                                                                                                                     | Q9Y4C4<br>L8E7L4                                                                 |
| 135 | XM_012853184.2                                     | L + H | <b>S843_122311</b>        | Fundulus heteroclitus mannose receptor C-type 1 (mrc1), transcript variant X1, mRNA                                                                                                                                                                | P22897                                                                           |

|     |                                                                                        |   |                           |                                                                                                                                                                                                                                                                                                                                                                                                                                                                |                                                                  |
|-----|----------------------------------------------------------------------------------------|---|---------------------------|----------------------------------------------------------------------------------------------------------------------------------------------------------------------------------------------------------------------------------------------------------------------------------------------------------------------------------------------------------------------------------------------------------------------------------------------------------------|------------------------------------------------------------------|
| 136 | XM_012861657.2                                                                         | L | <b>S10116_181333</b><br>2 | Fundulus heteroclitus matrix metalloproteinase-15 (LOC105925688), mRNA                                                                                                                                                                                                                                                                                                                                                                                         | P51511<br>Q7KZY0                                                 |
| 137 | XM_021316772.1                                                                         | L | <b>S10116_181333</b><br>2 | Fundulus heteroclitus matrix metalloproteinase-17-like (LOC105926619), mRNA                                                                                                                                                                                                                                                                                                                                                                                    | Q9ULZ9                                                           |
| 138 | XM_012856957.2                                                                         | L | <b>S281_404055</b>        | Fundulus heteroclitus methenyltetrahydrofolate synthetase (mthfs), transcript variant X1, mRNA                                                                                                                                                                                                                                                                                                                                                                 | H3BMB9<br>H3BN04<br>P49914<br>A0A0A6YYL1<br>A0A0U1RQM3<br>Q96EE9 |
| 139 | XM_012870215.2<br>XM_021320280.1<br>XM_021320281.1<br>XM_021320282.1<br>XM_012870216.2 | B | <b>S561_8990</b>          | Fundulus heteroclitus MICAL-like protein 1 (LOC105931512), transcript variant X1, mRNA<br>Fundulus heteroclitus MICAL-like protein 1 (LOC105931512), transcript variant X2, mRNA<br>Fundulus heteroclitus MICAL-like protein 1 (LOC105931512), transcript variant X3, mRNA<br>Fundulus heteroclitus MICAL-like protein 1 (LOC105931512), transcript variant X4, mRNA<br>Fundulus heteroclitus MICAL-like protein 1 (LOC105931512), transcript variant X5, mRNA | Q8N3F8<br>Q8IY33<br>P51153<br>B0QY91<br>H0Y6J8<br>B0QY86         |
| 140 | XM_021316006.1<br>XM_021316007.1<br>XM_021316008.1<br>XM_012861721.2                   | H | <b>S10010_923683</b>      | Fundulus heteroclitus muscleblind-like protein 3 (LOC105925742), transcript variant X1, mRNA<br>Fundulus heteroclitus muscleblind-like protein 3 (LOC105925742), transcript variant X2, mRNA<br>Fundulus heteroclitus muscleblind-like protein 3 (LOC105925742), transcript variant X3, mRNA<br>Fundulus heteroclitus muscleblind-like protein 3 (LOC105925742), transcript variant X4, mRNA                                                                   | Q9NUK0<br>B1AKI6<br>B1AKI4<br>B1AKI5<br>B1AKI2                   |
| 141 | XM_012868298.2                                                                         | L | <b>S470_275634</b>        | Fundulus heteroclitus N-acetyllactosaminide beta-1,3-N-acetylglucosaminyltransferase 2-like (LOC105930205), mRNA                                                                                                                                                                                                                                                                                                                                               | Q9Y2A9<br>M0R199<br>M0QX58                                       |
| 142 | XM_012876676.2                                                                         | H | <b>S10010_923683</b>      | Fundulus heteroclitus neural-cadherin-like (LOC105936037), mRNA                                                                                                                                                                                                                                                                                                                                                                                                | P19022                                                           |
| 143 | XM_021323261.1                                                                         | L | <b>S470_275634</b>        | Fundulus heteroclitus neuroblast differentiation-associated protein AHNAK-like (LOC105935490), mRNA                                                                                                                                                                                                                                                                                                                                                            | E9PJZ0<br>E9PLK4<br>E9PKR9                                       |

|     |                                  |       |                      |                                                                                                                                                                                                                |                                                                                                                  |
|-----|----------------------------------|-------|----------------------|----------------------------------------------------------------------------------------------------------------------------------------------------------------------------------------------------------------|------------------------------------------------------------------------------------------------------------------|
|     |                                  |       |                      |                                                                                                                                                                                                                | E9PJC6                                                                                                           |
|     |                                  |       |                      |                                                                                                                                                                                                                | E9PQE3                                                                                                           |
|     |                                  |       |                      |                                                                                                                                                                                                                | Q9BVU3                                                                                                           |
|     |                                  |       |                      |                                                                                                                                                                                                                | Q96EC4                                                                                                           |
| 144 | XM_012851721.2<br>XM_012851722.2 | B     | <b>S385_310604</b>   | Fundulus heteroclitus neuropeptide Y receptor type 1-like (LOC105917043), transcript variant X1, mRNA<br>Fundulus heteroclitus neuropeptide Y receptor type 1-like (LOC105917043), transcript variant X2, mRNA | B4DKL9<br>D6REY0<br>D6R9D0<br>D6RI97<br>D6RHH6<br>D6RC44<br>P25929                                               |
| 145 | XM_021322362.1                   | B     | <b>S561_8990</b>     | Fundulus heteroclitus nicotinamide/nicotinic acid mononucleotide adenylyltransferase 3 (LOC105934201), mRNA                                                                                                    | D6RGH7<br>D6RHV4<br>D6R975<br>D6REC8<br>D6RGG8<br>A0A2R8Y594<br>A0A2R8YGL3<br>A0A2R8YEU0<br>A0A2R8YE08<br>Q96T66 |
| 146 | XM_021316272.1                   | L + H | <b>S9864_1470929</b> | Fundulus heteroclitus nuclear receptor subfamily 2 group C member 2 (nr2c2), mRNA                                                                                                                              | P49116                                                                                                           |
| 147 | XM_012859216.2<br>XM_021314670.1 | L     | <b>S4811_4274</b>    | Fundulus heteroclitus oncoprotein induced transcript 3 (oit3), transcript variant X1, mRNA<br>Fundulus heteroclitus oncoprotein induced transcript 3 (oit3), transcript variant X2, mRNA                       | Q8WWZ8                                                                                                           |
| 148 | XM_012871695.2                   | B     | <b>S561_8956</b>     | Fundulus heteroclitus oocyte zinc finger protein XICOF22-like (LOC105932495), mRNA                                                                                                                             |                                                                                                                  |
| 149 | XM_012875441.2                   | B     | <b>S561_8990</b>     | Fundulus heteroclitus origin recognition complex subunit 4-like (LOC105935160), mRNA                                                                                                                           | O43929                                                                                                           |
| 150 | XM_012853337.2                   | B     | <b>S10045_81009</b>  | Fundulus heteroclitus p21 (RAC1) activated kinase 1 (pak1), mRNA                                                                                                                                               | Q13153                                                                                                           |
| 151 | XM_012868375.2                   | B     | <b>S9885_35456</b>   | Fundulus heteroclitus peroxisomal trans-2-enoyl-CoA reductase (pecr), mRNA                                                                                                                                     | B4DJS2                                                                                                           |

|     |                                                    |   |                        |                                                                                                                                                                                                                                                                                                                                                                |                                                                    |
|-----|----------------------------------------------------|---|------------------------|----------------------------------------------------------------------------------------------------------------------------------------------------------------------------------------------------------------------------------------------------------------------------------------------------------------------------------------------------------------|--------------------------------------------------------------------|
|     |                                                    |   |                        |                                                                                                                                                                                                                                                                                                                                                                | Q9BY49                                                             |
| 152 | XM_021319675.1                                     | L | <b>S10116_181333_2</b> | Fundulus heteroclitus phospholipid phosphatase 7 (inactive) (plpp7), transcript variant X2, mRNA                                                                                                                                                                                                                                                               | Q8NBV4<br>X6R886<br>A0A2R8Y4I9                                     |
| 153 | XM_021319584.1<br>XM_012868679.2<br>XM_012868680.2 | L | <b>S10150_201761</b>   | Fundulus heteroclitus potassium channel tetramerization domain containing 15 (kctd15), transcript variant X1, mRNA<br>Fundulus heteroclitus potassium channel tetramerization domain containing 15 (kctd15), transcript variant X2, mRNA<br>Fundulus heteroclitus potassium channel tetramerization domain containing 15 (kctd15), transcript variant X3, mRNA | Q96S11<br>K7EN63<br>V9GYY8<br>K7EM48<br>K7EQS3<br>K7EPF0<br>K7EIF1 |
| 154 | XM_021323739.1                                     | B | <b>S9917_1884759</b>   | Fundulus heteroclitus potassium channel tetramerization domain containing 4 (kctd4), mRNA                                                                                                                                                                                                                                                                      | Q8WVF5                                                             |
| 155 | XM_012859271.2                                     | L | <b>S470_275634</b>     | Fundulus heteroclitus potassium two pore domain channel subfamily K member 1 (kcnk1), mRNA                                                                                                                                                                                                                                                                     | O00180<br>A0A024R3T2<br>Q5T5E6                                     |
| 156 | XM_021310700.1                                     | B | <b>S53_432183</b>      | Fundulus heteroclitus protein phosphatase 1 regulatory subunit 15B-like (LOC105917785), mRNA                                                                                                                                                                                                                                                                   | Q5SWA1                                                             |
| 157 | XM_012862438.2                                     | L | <b>S470_275634</b>     | Fundulus heteroclitus protein RIC-3-like (LOC105926210), mRNA                                                                                                                                                                                                                                                                                                  | Q7Z5B4<br>A0A0S2Z607<br>E9PK46                                     |
| 158 | XM_021313230.1                                     | L | <b>S361_81605</b>      | Fundulus heteroclitus quinolinate phosphoribosyltransferase (qprt), transcript variant X2, mRNA                                                                                                                                                                                                                                                                | Q15274<br>H3BP73                                                   |
| 159 | XM_021308740.1<br>XM_012882840.2                   | B | <b>S10045_81009</b>    | Fundulus heteroclitus RAC-beta serine/threonine-protein kinase B (LOC105940337), transcript variant X1, mRNA<br>Fundulus heteroclitus RAC-beta serine/threonine-protein kinase B (LOC105940337), transcript variant X2, mRNA                                                                                                                                   | P31751<br>C9JHS6<br>J3QLS6<br>M0QZK3<br>J3QKW1<br>J3QL45           |

|     |                |   |                           |                                                                                                              |            |
|-----|----------------|---|---------------------------|--------------------------------------------------------------------------------------------------------------|------------|
|     |                |   |                           |                                                                                                              | M0R283     |
|     |                |   |                           |                                                                                                              | M0R275     |
|     |                |   |                           |                                                                                                              | C9JIJ1     |
|     |                |   |                           |                                                                                                              | A8MX96     |
|     |                |   |                           |                                                                                                              | C9JC83     |
|     |                |   |                           |                                                                                                              | E7EVP8     |
|     |                |   |                           |                                                                                                              | J3KSY8     |
|     |                |   |                           |                                                                                                              | J3KRI8     |
|     |                |   |                           |                                                                                                              | C9JIF6     |
|     |                |   |                           |                                                                                                              | C9J258     |
|     |                |   |                           |                                                                                                              | A0A0A0MRF1 |
|     |                |   |                           |                                                                                                              | MQQZW8     |
|     |                |   |                           |                                                                                                              | J3KTC6     |
|     |                |   |                           |                                                                                                              | J3KTP4     |
|     |                |   |                           |                                                                                                              | A0A1B0GXA2 |
| 160 | XM_012865928.2 | L | <b>S10116_181333</b><br>2 | Fundulus heteroclitus RNA-binding protein 38-like (LOC105928591), mRNA                                       | Q9H0Z9     |
| 161 | XM_021319315.1 | L | <b>S10116_181333</b><br>2 | Fundulus heteroclitus SAM domain-containing protein SAMSN-1-like (LOC105930089), transcript variant X1, mRNA | Q9NSI8     |
|     | XM_021319316.1 |   |                           | Fundulus heteroclitus SAM domain-containing protein SAMSN-1-like (LOC105930089), transcript variant X2, mRNA | S6FRS6     |
|     |                |   |                           |                                                                                                              | A0A2R8Y4K8 |
| 162 | XM_012880667.2 | L | <b>S10075_823597</b>      | Fundulus heteroclitus SAYSVFN motif domain containing 1 (saysd1), mRNA                                       | Q9NPB0     |
| 163 | XM_012880873.2 | H | <b>S105_467399</b>        | Fundulus heteroclitus scavenger receptor class A member 5 (scara5), transcript variant X1, mRNA              | Q6ZMJ2     |
|     | XM_021307722.1 |   |                           | Fundulus heteroclitus scavenger receptor class A member 5 (scara5), transcript variant X2, mRNA              |            |
| 164 | XM_021309352.1 | B | <b>S4128_2822</b>         | Fundulus heteroclitus sorbin and SH3 domain-containing protein 1 (LOC105915919), transcript variant X1, mRNA | Q9BX66     |
|     | XM_021309354.1 |   |                           | Fundulus heteroclitus sorbin and SH3 domain-containing protein 1 (LOC105915919), transcript variant X2, mRNA | S4R303     |
|     | XM_021309355.1 |   |                           | Fundulus heteroclitus sorbin and SH3 domain-containing protein 1 (LOC105915919), transcript variant X3, mRNA | A0A0U1RQI5 |
|     | XM_021309356.1 |   |                           | Fundulus heteroclitus sorbin and SH3 domain-containing protein 1 (LOC105915919), transcript variant X4, mRNA |            |
|     | XM_021309357.1 |   |                           | Fundulus heteroclitus sorbin and SH3 domain-containing protein 1 (LOC105915919), transcript variant X5, mRNA |            |

|     |                |   |                      |                                                                                                              |            |
|-----|----------------|---|----------------------|--------------------------------------------------------------------------------------------------------------|------------|
|     | XM_021309358.1 |   |                      | Fundulus heteroclitus sorbin and SH3 domain-containing protein 1 (LOC105915919), transcript variant X6, mRNA |            |
|     | XM_021309359.1 |   |                      | Fundulus heteroclitus sorbin and SH3 domain-containing protein 1 (LOC105915919), transcript variant X7, mRNA |            |
|     | XM_021309360.1 |   |                      | Fundulus heteroclitus sorbin and SH3 domain-containing protein 1 (LOC105915919), transcript variant X8, mRNA |            |
| 165 | XM_012875976.2 | L | <b>S9929_413856</b>  | Fundulus heteroclitus sphingosine-1-phosphate phosphatase 1-like (LOC105935524), mRNA                        | Q9BX95     |
|     |                |   | <b>S10116_181333</b> |                                                                                                              |            |
| 166 | XM_012869329.2 | L | <b>2</b>             | Fundulus heteroclitus SPRY domain-containing protein 3-like (LOC105930899), mRNA                             | Q6PJ21     |
|     |                |   | <b>S10116_181333</b> |                                                                                                              |            |
| 167 | XM_012879674.2 | L | <b>2</b>             | Fundulus heteroclitus sterol regulatory element binding transcription factor 2 (sreb2), mRNA                 | Q12772     |
|     |                |   |                      |                                                                                                              | A0A024R1Q0 |
|     |                |   |                      |                                                                                                              | A0A087X1T2 |
|     |                |   |                      |                                                                                                              | G3V0I8     |
|     |                |   |                      |                                                                                                              | H0Y7E5     |
| 168 | XM_012859674.2 | L | <b>S9869_217319</b>  | Fundulus heteroclitus stonustoxin subunit alpha-like (LOC105923726), mRNA                                    | A0A146SVJ8 |
|     |                |   |                      |                                                                                                              | A0A146R4X3 |
|     |                |   |                      |                                                                                                              | A0A146PFK2 |
|     |                |   |                      |                                                                                                              | A0A146RM93 |
|     |                |   |                      |                                                                                                              | A0A146R189 |
|     |                |   |                      |                                                                                                              | A0A146PN29 |
|     |                |   |                      |                                                                                                              | A0A146RQM2 |
|     |                |   |                      |                                                                                                              | A0A146TTQ9 |
|     |                |   |                      |                                                                                                              | A0A146PME0 |
|     |                |   |                      |                                                                                                              | A0A146RKG4 |
|     |                |   |                      |                                                                                                              | A0A146TYZ2 |
|     |                |   |                      |                                                                                                              | A0A146PI85 |
|     |                |   |                      |                                                                                                              | A0A146T2H2 |
|     |                |   |                      |                                                                                                              | A0A146SKT8 |
|     |                |   |                      |                                                                                                              | A0A146SAZ5 |
|     |                |   |                      |                                                                                                              | A0A146RI68 |
|     |                |   |                      |                                                                                                              | A0A146TS45 |
|     |                |   |                      |                                                                                                              | A0A146PMN8 |

|     |                |       |                        |                                                                                           |            |
|-----|----------------|-------|------------------------|-------------------------------------------------------------------------------------------|------------|
|     |                |       |                        |                                                                                           | A0A146Q2I0 |
|     |                |       |                        |                                                                                           | A0A146RJ50 |
|     |                |       |                        |                                                                                           | A0A146S8H6 |
|     |                |       |                        |                                                                                           | A0A146QVF2 |
|     |                |       |                        |                                                                                           | A0A146TAX8 |
|     |                |       |                        |                                                                                           | A0A146QCK6 |
|     |                |       |                        |                                                                                           | A0A146TV46 |
| 169 | XM_012881138.1 | L     | <b>S1_2497139</b>      | Fundulus heteroclitus sushi domain containing 1 (susd1), transcript variant X1, mRNA      | Q6UWL2     |
|     | XM_012881219.1 |       |                        | Fundulus heteroclitus sushi domain containing 1 (susd1), transcript variant X2, mRNA      | F8WAQ1     |
|     |                |       |                        |                                                                                           | H3BLV4     |
|     |                |       |                        |                                                                                           | H0Y6B2     |
|     |                |       |                        |                                                                                           | H0YCH6     |
| 170 | XM_021318378.1 | L + B | <b>S9899_1841030</b>   | Fundulus heteroclitus syntaxin-2 (LOC105928768), transcript variant X1, mRNA              | P32856     |
|     | XM_012866231.2 |       |                        | Fundulus heteroclitus syntaxin-2 (LOC105928768), transcript variant X2, mRNA              | A0A348AY69 |
|     |                |       |                        |                                                                                           | J3KNU7     |
| 171 | XM_021317112.1 | L + H | <b>S42_249281</b>      | Fundulus heteroclitus thyrotropin releasing hormone (trh), mRNA                           | A0A146Z4D1 |
|     |                |       |                        |                                                                                           | A0A147AU48 |
|     |                |       |                        |                                                                                           | A0A147B357 |
|     |                |       |                        |                                                                                           | A0A146ZXW2 |
|     |                |       |                        |                                                                                           | A0A146YGA5 |
|     |                |       |                        |                                                                                           | A0A147AVL5 |
|     |                |       |                        |                                                                                           | A0A146SP16 |
|     |                |       |                        |                                                                                           | A0A146VYC6 |
| 172 | XM_012866902.2 | B     | <b>S4919_3133</b>      | Fundulus heteroclitus transitional endoplasmic reticulum ATPase-like (LOC105929216), mRNA | P55072     |
|     |                |       |                        |                                                                                           | C9JUP7     |
|     |                |       |                        |                                                                                           | C9IZA5     |
| 173 | XM_012861994.2 | L     | <b>S10010_101246_6</b> | Fundulus heteroclitus transmembrane and coiled-coil domains 4 (tmco4), mRNA               | Q5TGY1     |
|     |                |       |                        |                                                                                           | A0A075B6H3 |

|     |                |   |                      |                                                                                                |            |
|-----|----------------|---|----------------------|------------------------------------------------------------------------------------------------|------------|
|     |                |   |                      |                                                                                                | A0A024RAD2 |
|     |                |   |                      |                                                                                                | A0A024RA95 |
|     |                |   |                      |                                                                                                | A0A024RAA3 |
| 174 | XM_012862605.2 | B | <b>S9885_35456</b>   | Fundulus heteroclitus uridine phosphorylase 1 (LOC105926333), mRNA                             | C9J486     |
|     |                |   |                      |                                                                                                | B4DND0     |
|     |                |   |                      |                                                                                                | C9K0J2     |
|     |                |   |                      |                                                                                                | F8WD51     |
|     |                |   |                      |                                                                                                | Q16831     |
| 175 | XM_021307360.1 | H | <b>S9915_1266854</b> | Fundulus heteroclitus vasoactive intestinal peptide receptor 1 (vipr1), mRNA                   | P32241     |
|     |                |   |                      |                                                                                                | C9JDT8     |
|     |                |   |                      |                                                                                                | A0A024R2N2 |
|     |                |   |                      |                                                                                                | C9JH33     |
|     |                |   |                      |                                                                                                | F2Z2U6     |
| 176 | XM_012853036.2 | B | <b>S9917_1884759</b> | Fundulus heteroclitus von Willebrand factor C domain containing 2 (vwc2), mRNA                 | B2RUY7     |
| 177 | XM_012871962.2 | L | <b>S2711_3408</b>    | Fundulus heteroclitus wolfram ER transmembrane glycoprotein (wfs1), mRNA                       | Q2TAL6     |
| 178 | XM_012855084.2 | L | <b>S99_447176</b>    | Fundulus heteroclitus WT1 interacting protein (LOC105919719), mRNA                             | A6NIX2     |
|     |                |   |                      |                                                                                                | Q96IZ0     |
| 179 | XM_012871344.2 | H | <b>S9915_1266854</b> | Fundulus heteroclitus zinc finger and BTB domain containing 14 (zbtb14), mRNA                  | O43829     |
| 180 | XM_012867992.2 | B | <b>S9885_35456</b>   | Fundulus heteroclitus zinc finger DHHC-type containing 7 (zdhhc7), transcript variant X1, mRNA | Q9NXF8     |
|     | XM_021319233.1 |   |                      | Fundulus heteroclitus zinc finger DHHC-type containing 7 (zdhhc7), transcript variant X2, mRNA | H3BMI0     |
|     |                |   |                      |                                                                                                | H3BNQ9     |
| 181 | XM_012851106.2 | L | <b>S185_90462</b>    | Fundulus heteroclitus zinc finger HIT-type containing 3 (znhit3), transcript variant X1, mRNA  | Q15649     |
|     | XM_012851107.2 |   |                      | Fundulus heteroclitus zinc finger HIT-type containing 3 (znhit3), transcript variant X2, mRNA  | A0A087X045 |
|     |                |   |                      |                                                                                                | A0A087WY54 |
|     |                |   |                      |                                                                                                | A0A024R0X8 |
|     |                |   |                      |                                                                                                | A0A087WTR0 |
|     |                |   |                      |                                                                                                | A0A087WY42 |
|     |                |   |                      |                                                                                                | A0A087X1G0 |



|     |                |   |                           |                                                                                                | A0A087WY18                                                                                                                                                                                                                                                                           |
|-----|----------------|---|---------------------------|------------------------------------------------------------------------------------------------|--------------------------------------------------------------------------------------------------------------------------------------------------------------------------------------------------------------------------------------------------------------------------------------|
| 182 | XM_012869702.2 | L | <b>S10116_181333</b><br>2 | Fundulus heteroclitus zinc finger protein 135-like (LOC105931150), transcript variant X1, mRNA | P52742                                                                                                                                                                                                                                                                               |
|     | XM_012869703.2 |   |                           | Fundulus heteroclitus zinc finger protein 135-like (LOC105931150), transcript variant X2, mRNA |                                                                                                                                                                                                                                                                                      |
|     | XM_021320099.1 |   |                           | Fundulus heteroclitus zinc finger protein 135-like (LOC105931150), transcript variant X3, mRNA |                                                                                                                                                                                                                                                                                      |
|     | XM_021313754.1 |   |                           | Fundulus heteroclitus zinc finger protein 260-like (LOC105921995), transcript variant X4, mRNA |                                                                                                                                                                                                                                                                                      |
|     | XM_021313755.1 |   |                           | Fundulus heteroclitus zinc finger protein 260-like (LOC105921995), transcript variant X5, mRNA |                                                                                                                                                                                                                                                                                      |
| 183 | XM_021314095.1 | L | <b>S470_275634</b>        | Fundulus heteroclitus zinc finger protein OZF-like (LOC110367702), mRNA                        | Q15072<br>Q9UJW8                                                                                                                                                                                                                                                                     |
| 184 | AY040818.1     | L | <b>S897_124935</b>        | Galleria mellonella mucin-like protein mRNA, complete sequence                                 | A0A146ZI98<br>A0A146UW64<br>A0A146UVM3<br>A0A146VIR1<br>A0A146NXA0<br>A0A146YPL6<br>A0A146NXW9<br>A0A146VJH4<br>A0A146VIT9<br>A0A146VIX4<br>A0A146VIF9<br>A0A146VJX0<br>A0A146VII5<br>A0A146VIJ2<br>A0A146VIH0<br>A0A146VIF8<br>A0A146ZK42<br>A0A146ZHP4<br>A0A146UXF5<br>A0A146UWT9 |

|     |                |   |                     |                                                                                                        |            |
|-----|----------------|---|---------------------|--------------------------------------------------------------------------------------------------------|------------|
|     |                |   |                     |                                                                                                        | A0A146UW87 |
|     |                |   |                     |                                                                                                        | A0A146YMT7 |
|     |                |   |                     |                                                                                                        | A0A146N7F9 |
|     |                |   |                     |                                                                                                        | A0A146YNW8 |
|     |                |   |                     |                                                                                                        | A0A146YMT4 |
| 185 | NM_204726.1    | L | <b>S178_234532</b>  | Gallus gallus caspase 6 (CASP6), mRNA                                                                  | P55212     |
|     |                |   |                     |                                                                                                        | D6RBM3     |
|     |                |   |                     |                                                                                                        | D6RHU3     |
| 186 | XM_016861023.1 | L | <b>S9866_174755</b> | Gossypium hirsutum probable protein phosphatase 2C 76 (LOC107929561), transcript variant X1, mRNA      | A0A1U8LPM0 |
|     | XM_016861024.1 |   |                     | Gossypium hirsutum probable protein phosphatase 2C 76 (LOC107929561), transcript variant X2, mRNA      | A0A1U8JN63 |
|     |                |   |                     |                                                                                                        | A0A1U8NE91 |
|     |                |   |                     |                                                                                                        | A0A1U8JXL2 |
|     |                |   |                     |                                                                                                        | A0A1U8LSX4 |
|     |                |   |                     |                                                                                                        | A0A1U8JN81 |
| 187 | XM_014421359.2 | L | <b>S1100_29850</b>  | Halyomorpha halys putative epidermal cell surface receptor (LOC106681176), transcript variant X1, mRNA | Q99527     |
|     | XM_014421360.2 |   |                     | Halyomorpha halys putative epidermal cell surface receptor (LOC106681176), transcript variant X2, mRNA | P13688     |
|     | XM_014421361.2 |   |                     | Halyomorpha halys putative epidermal cell surface receptor (LOC106681176), transcript variant X3, mRNA | P51864     |
| 188 | XM_005945254.2 | B | <b>S771_52821</b>   | Haplochromis burtoni neuralized E3 ubiquitin protein ligase 4 (neur14), transcript variant X1, mRNA    | Q96JN8     |
|     | XM_014341031.1 |   |                     | Haplochromis burtoni neuralized E3 ubiquitin protein ligase 4 (neur14), transcript variant X2, mRNA    | I3L2W2     |
|     |                |   |                     |                                                                                                        | I3L2Z9     |
|     |                |   |                     |                                                                                                        | K7EPS7     |
|     |                |   |                     |                                                                                                        | I3L100     |
| 189 | XM_004865598.2 | B | <b>S3317_962</b>    | Heterocephalus glaber ELAV like RNA binding protein 3 (Elavl3), transcript variant X1, mRNA            | Q14576     |
|     | XM_021244821.1 |   |                     | Heterocephalus glaber ELAV like RNA binding protein 3 (Elavl3), transcript variant X2, mRNA            | Q96J71     |
|     | XM_004865599.2 |   |                     | Heterocephalus glaber ELAV like RNA binding protein 3 (Elavl3), transcript variant X3, mRNA            | K7EPB5     |
|     |                |   |                     |                                                                                                        | Q9H024     |
|     |                |   |                     |                                                                                                        | L8E8Z0     |

|     |                                                    |   |                     |                                                                                                                                                                                                                                                                                        |                                                                                                                                                                                                                                                |
|-----|----------------------------------------------------|---|---------------------|----------------------------------------------------------------------------------------------------------------------------------------------------------------------------------------------------------------------------------------------------------------------------------------|------------------------------------------------------------------------------------------------------------------------------------------------------------------------------------------------------------------------------------------------|
| 190 | XM_019882651.1                                     | L | <b>S9966_776829</b> | Hippocampus comes B-cell lymphoma/leukemia 11A-like (LOC109523475), mRNA                                                                                                                                                                                                               | Q9H165<br>Q9C0K0<br>A0A2U3TZJ5<br>A0A0J9YXG2<br>A0A2R8Y7B0<br>A0A2R8Y2E8<br>A0A2R8YDW6<br>B4DT16<br>B3KNX8<br>B4DMK8<br>B3KRW8<br>A0A2R8YEK1<br>A0A0J9YYJ9<br>A0A0J9YY13<br>A0A2R8YHH4<br>A0A2R8YGT9<br>A0A2R8Y7W4<br>A0A2R8YDS7<br>A0A2R8YCR5 |
| 191 | XM_019636406.1<br>XM_019636407.1<br>XM_019636408.1 | L | <b>S9966_92994</b>  | Hipposideros armiger WW domain binding protein 1-like (WBP1L), transcript variant X1, mRNA<br>Hipposideros armiger WW domain binding protein 1-like (WBP1L), transcript variant X2, mRNA<br>Hipposideros armiger WW domain binding protein 1-like (WBP1L), transcript variant X3, mRNA | Q9NX94                                                                                                                                                                                                                                         |
| 192 | NM_001350175.1<br>NM_001350174.1                   | B | <b>S3317_962</b>    | Homo sapiens ataxin 7 like 2 (ATXN7L2), transcript variant 1, mRNA<br>Homo sapiens ataxin 7 like 2 (ATXN7L2), transcript variant 3, mRNA                                                                                                                                               | Q5T6C5<br>S4R3G5<br>I6L9B5                                                                                                                                                                                                                     |
| 193 | BC049193.1                                         | B | <b>S771_52821</b>   | Homo sapiens DENN/MADD domain containing 2A, mRNA (cDNA clone IMAGE:4445131), partial cds                                                                                                                                                                                              | A2RUF6                                                                                                                                                                                                                                         |
| 194 | DQ359746.1                                         | L | <b>S1100_29850</b>  | Homo sapiens ets family transcription factor ELF2C mRNA, complete cds, alternatively spliced                                                                                                                                                                                           | B0KYV4                                                                                                                                                                                                                                         |
| 195 | NG_051966.1                                        | L | <b>S9866_174755</b> | Homo sapiens fibroblast growth factor 12 (FGF12), RefSeqGene on chromosome 3                                                                                                                                                                                                           | P61328                                                                                                                                                                                                                                         |

|     |             |   |                      |                                                                                                        |            |
|-----|-------------|---|----------------------|--------------------------------------------------------------------------------------------------------|------------|
|     |             |   |                      |                                                                                                        | C9JEN8     |
|     |             |   |                      |                                                                                                        | C9JUK8     |
|     |             |   |                      |                                                                                                        | C9JIN3     |
|     |             |   |                      |                                                                                                        | Q99517     |
| 196 | NG_007469.3 | B | <b>S8943_473</b>     | Homo sapiens glucosaminyl (N-acetyl) transferase 2 (I blood group) (GCNT2), RefSeqGene on chromosome 6 | Q8N0V5     |
|     |             |   |                      |                                                                                                        | A0A1W2PRW1 |
|     |             |   |                      |                                                                                                        | A8K580     |
|     |             |   |                      |                                                                                                        | B7ZBL3     |
| 197 | BC053865.1  | B | <b>S3317_962</b>     | Homo sapiens KIAA1345 protein, mRNA (cDNA clone IMAGE:5204856)                                         | Q9P2K1     |
| 198 | BC146671.1  | B | <b>S3317_962</b>     | Homo sapiens mannosidase, endo-alpha, mRNA (cDNA clone MGC:164944 IMAGE:40148201), complete cds        | Q5SRI9     |
|     |             |   |                      |                                                                                                        | Q5VSG8     |
|     |             |   |                      |                                                                                                        | X6R7A2     |
|     |             |   |                      |                                                                                                        | E9PMU5     |
|     |             |   |                      |                                                                                                        | H0YCZ3     |
|     |             |   |                      |                                                                                                        | B4DW72     |
| 199 | NM_054024.3 | L | <b>S9966_92994</b>   | Homo sapiens MIA SH3 domain ER export factor 2 (MIA2), transcript variant 9, mRNA                      | G3V599     |
|     |             |   |                      |                                                                                                        | G3V5K6     |
|     |             |   |                      |                                                                                                        | G3V3C4     |
|     |             |   |                      |                                                                                                        | G3V4M1     |
|     |             |   |                      |                                                                                                        | Q6PIE7     |
|     |             |   |                      |                                                                                                        | Q96PC5     |
| 200 | BC047761.1  | B | <b>S3317_962</b>     | Homo sapiens MKL/myocardin-like 2, mRNA (cDNA clone IMAGE:5741919), complete cds                       | Q9JULH7    |
|     |             |   |                      |                                                                                                        | Q969V6     |
|     |             |   |                      |                                                                                                        | B3KXK5     |
| 201 | BC084547.1  | H | <b>S9889_2454843</b> | Homo sapiens NCK-associated protein 1-like, mRNA (cDNA clone IMAGE:5451042), partial cds               | P55160     |
|     |             |   |                      |                                                                                                        | Q9Y2A7     |
|     |             |   |                      |                                                                                                        | Q9HCH0     |
|     |             |   |                      |                                                                                                        | O14513     |

|     |             |   |                      |                                                                                                                                                                           |            |
|-----|-------------|---|----------------------|---------------------------------------------------------------------------------------------------------------------------------------------------------------------------|------------|
|     |             |   |                      |                                                                                                                                                                           | O14512     |
|     |             |   |                      |                                                                                                                                                                           | P61586     |
|     |             |   |                      |                                                                                                                                                                           | H7C1V4     |
|     |             |   |                      |                                                                                                                                                                           | A0A0A0MS79 |
|     |             |   |                      |                                                                                                                                                                           | H7C187     |
|     |             |   |                      |                                                                                                                                                                           | A0A0A0MSE4 |
|     |             |   |                      |                                                                                                                                                                           | A0A1W2PNT1 |
|     |             |   |                      |                                                                                                                                                                           | F8W050     |
|     |             |   |                      |                                                                                                                                                                           | C9JYL7     |
|     |             |   |                      |                                                                                                                                                                           | A0A1W2PS86 |
|     |             |   |                      |                                                                                                                                                                           | Q9BV52     |
|     |             |   |                      |                                                                                                                                                                           | Q5XG97     |
|     |             |   |                      |                                                                                                                                                                           | Q6P1M2     |
|     |             |   |                      |                                                                                                                                                                           | B3KMK7     |
|     |             |   |                      |                                                                                                                                                                           | B3KM75     |
|     |             |   |                      |                                                                                                                                                                           | B2RA26     |
| 202 | NG_028180.1 | B | <b>S1223_43679</b>   | Homo sapiens serpin family F member 1 (SERPINF1), RefSeqGene on chromosome 17                                                                                             | I3L3Z3     |
|     |             |   |                      |                                                                                                                                                                           | I3L1U4     |
|     |             |   |                      |                                                                                                                                                                           | I3L2R7     |
|     |             |   |                      |                                                                                                                                                                           | I3L4Z0     |
|     |             |   |                      |                                                                                                                                                                           | I3L425     |
|     |             |   |                      |                                                                                                                                                                           | I3L4N7     |
|     |             |   |                      |                                                                                                                                                                           | I3L107     |
|     |             |   |                      |                                                                                                                                                                           | I3L4F9     |
|     |             |   |                      |                                                                                                                                                                           | A0A0J9YXW2 |
|     |             |   |                      |                                                                                                                                                                           | A0A0J9YXF9 |
|     |             |   |                      |                                                                                                                                                                           | P36955     |
| 203 | BC036298.1  | L | <b>S9929_1038014</b> | Homo sapiens serpin peptidase inhibitor, clade H (heat shock protein 47), member 1, (collagen binding protein 1), mRNA (cDNA clone MGC:25195 IMAGE:4748644), complete cds | A0A024R5K8 |

|     |                |   |                      | A8K259                                                                                                           |
|-----|----------------|---|----------------------|------------------------------------------------------------------------------------------------------------------|
| 204 | NM_001042437.1 | L | <b>S9929_1038014</b> | Homo sapiens ST3 beta-galactoside alpha-2,3-sialyltransferase 5 (ST3GAL5), transcript variant 2, mRNA            |
|     |                |   |                      | Q9UNP4                                                                                                           |
|     |                |   |                      | A0A0S2Z4Q7                                                                                                       |
|     |                |   |                      | A0A1W2PR45                                                                                                       |
|     |                |   |                      | A0A1X7SBT2                                                                                                       |
|     |                |   |                      | A0A1W2PRC6                                                                                                       |
|     |                |   |                      | A0A1W2PQR0                                                                                                       |
|     |                |   |                      | A0A0S2Z4S6                                                                                                       |
|     |                |   |                      | A0A1W2PRD9                                                                                                       |
|     |                |   |                      | A0A1W2PQQ6                                                                                                       |
|     |                |   |                      | A0A1W2PRY1                                                                                                       |
|     |                |   |                      | A0A1W2PPT1                                                                                                       |
|     |                |   |                      | C9JYS9                                                                                                           |
|     |                |   |                      | A0A1W2PQH5                                                                                                       |
|     |                |   |                      | A0A1W2PQT6                                                                                                       |
|     |                |   |                      | A0A1W2PR43                                                                                                       |
|     |                |   |                      | A0A1W2PRT0                                                                                                       |
|     |                |   |                      | A0A1W2PP90                                                                                                       |
|     |                |   |                      | A0A1W2PQ01                                                                                                       |
|     |                |   |                      | A0A1W2PNZ0                                                                                                       |
|     |                |   |                      | A0A1W2PPQ6                                                                                                       |
|     |                |   |                      | A0A1W2PQM6                                                                                                       |
|     |                |   |                      | A0A1W2PP52                                                                                                       |
|     |                |   |                      | A0A1W2PRP8                                                                                                       |
|     |                |   |                      | A0A1W2PNR4                                                                                                       |
|     |                |   |                      | A0A1W2PNV2                                                                                                       |
| 205 | BC050384.1     | L | <b>S9929_1038014</b> | Homo sapiens suppressor of Ty 3 homolog (S. cerevisiae), mRNA (cDNA clone MGC:51927 IMAGE:5758833), complete cds |
|     |                |   |                      | Q7KZ85                                                                                                           |
|     |                |   |                      | D3DTZ5                                                                                                           |

|     |                |   |                      |                                                                                             |            |
|-----|----------------|---|----------------------|---------------------------------------------------------------------------------------------|------------|
|     |                |   |                      |                                                                                             | A0A024RD67 |
|     |                |   |                      |                                                                                             | B4E0Q4     |
| 206 | BC142727.1     | L | <b>S1100_29850</b>   | Homo sapiens ubiquitin specific peptidase 19, mRNA (cDNA clone IMAGE:40148933), partial cds | O94966     |
| 207 | NM_145172.4    | L | <b>S9929_1038014</b> | Homo sapiens WD repeat domain 63 (WDR63), transcript variant 1, mRNA                        | Q8IWG1     |
|     | NM_001288563.1 |   |                      | Homo sapiens WD repeat domain 63 (WDR63), transcript variant 2, mRNA                        | HOYEC9     |
|     |                |   |                      |                                                                                             | E9PLK2     |
|     |                |   |                      |                                                                                             | E9PLW4     |
|     |                |   |                      |                                                                                             | L8E9L7     |
| 208 | GQ184290.1     | L | <b>S9929_1038014</b> | Hyriopsis cumingii metallothionein mRNA, complete cds                                       | P02795     |
|     |                |   |                      |                                                                                             | P13640     |
|     |                |   |                      |                                                                                             | P25713     |
|     |                |   |                      |                                                                                             | P04731     |
|     |                |   |                      |                                                                                             | P04732     |
|     |                |   |                      |                                                                                             | P04733     |
|     |                |   |                      |                                                                                             | P80297     |
|     |                |   |                      |                                                                                             | P80294     |
|     |                |   |                      |                                                                                             | P07438     |
|     |                |   |                      |                                                                                             | Q8N339     |
|     |                |   |                      |                                                                                             | A0A024R6R7 |
|     |                |   |                      |                                                                                             | P98164     |
|     |                |   |                      |                                                                                             | Q93083     |
|     |                |   |                      |                                                                                             | Q9Y415     |
|     |                |   |                      |                                                                                             | Q14872     |
|     |                |   |                      |                                                                                             | P47944     |
|     |                |   |                      |                                                                                             | P0DM35     |
|     |                |   |                      |                                                                                             | A1L3X4     |
|     |                |   |                      |                                                                                             | H3BRY8     |
|     |                |   |                      |                                                                                             | H3BSP9     |

|     |                |       |                     |                                                                                                                                      |            |
|-----|----------------|-------|---------------------|--------------------------------------------------------------------------------------------------------------------------------------|------------|
|     |                |       |                     |                                                                                                                                      | H3BSS0     |
|     |                |       |                     |                                                                                                                                      | H3BQX6     |
|     |                |       |                     |                                                                                                                                      | U3KQD7     |
|     |                |       |                     |                                                                                                                                      | H3BR34     |
|     |                |       |                     |                                                                                                                                      | H3BTG5     |
| 209 | XM_017487033.1 | L     | <b>S9866_174755</b> | Ictalurus punctatus histone acetyltransferase KAT7-like (LOC108275911), transcript variant X2, mRNA                                  | O95251     |
|     |                |       |                     |                                                                                                                                      | D6RFZ5     |
| 210 | XM_025011043.1 | L     | <b>S140_384361</b>  | Kryptolebias marmoratus alpha-N-acetylgalactosaminide alpha-2,6-sialyltransferase 1-like (LOC108249294), transcript variant X4, mRNA | Q9NSC7     |
|     |                |       |                     |                                                                                                                                      | K7EMB6     |
|     |                |       |                     |                                                                                                                                      | G3XAD9     |
|     |                |       |                     |                                                                                                                                      | K7EJA8     |
|     |                |       |                     |                                                                                                                                      | K7EJC9     |
| 211 | XM_017426954.2 | L     | <b>S140_384361</b>  | Kryptolebias marmoratus contactin-4-like (LOC108242227), transcript variant X1, mRNA                                                 | Q8I WV2    |
|     | XM_017426955.2 |       |                     | Kryptolebias marmoratus contactin-4-like (LOC108242227), transcript variant X2, mRNA                                                 | Q9C0A0     |
|     |                |       |                     |                                                                                                                                      | E9PDN6     |
|     |                |       |                     |                                                                                                                                      | A0A087WTA1 |
|     |                |       |                     |                                                                                                                                      | F5H107     |
|     |                |       |                     |                                                                                                                                      | A0A0A0MR20 |
| 212 | XM_017429141.2 | L     | <b>S361_81605</b>   | Kryptolebias marmoratus leucine-rich repeat-containing protein 32-like (LOC108243584), transcript variant X1, mRNA                   | Q14392     |
|     | XM_017429139.2 |       |                     | Kryptolebias marmoratus leucine-rich repeat-containing protein 32-like (LOC108243584), transcript variant X2, mRNA                   |            |
| 213 | XM_017426977.2 | B     | <b>S9888_703558</b> | Kryptolebias marmoratus MLLT3, super elongation complex subunit (mllt3), transcript variant X1, mRNA                                 | P42568     |
|     | XM_025008252.1 |       |                     | Kryptolebias marmoratus MLLT3, super elongation complex subunit (mllt3), transcript variant X2, mRNA                                 | A0A0S2Z448 |
|     | XM_025008253.1 |       |                     | Kryptolebias marmoratus MLLT3, super elongation complex subunit (mllt3), transcript variant X3, mRNA                                 | A0A0S2Z449 |
|     |                |       |                     |                                                                                                                                      | B1APT5     |
| 214 | XM_017409427.2 | L + H | <b>S42_249281</b>   | Kryptolebias marmoratus thyrotropin releasing hormone (trh), mRNA                                                                    | A0A146Z4D1 |
|     |                |       |                     |                                                                                                                                      | A0A147AU48 |
|     |                |       |                     |                                                                                                                                      | A0A147B357 |
|     |                |       |                     |                                                                                                                                      | A0A146ZXW2 |



|     |                |       |                                  |                                                                                                                                                          |            |
|-----|----------------|-------|----------------------------------|----------------------------------------------------------------------------------------------------------------------------------------------------------|------------|
|     |                |       |                                  |                                                                                                                                                          | A0A146YGA5 |
|     |                |       |                                  |                                                                                                                                                          | A0A147AVL5 |
|     |                |       |                                  |                                                                                                                                                          | A0A146SP16 |
|     |                |       |                                  |                                                                                                                                                          | A0A146VYC6 |
| 215 | XM_020639546.1 | H     | <b>S9874_1914529</b>             | Labrus bergylta protein ADP-ribosylarginine hydrolase-like (LOC109988148), mRNA                                                                          | P54922     |
|     |                |       |                                  |                                                                                                                                                          | Q9NX46     |
|     |                |       |                                  |                                                                                                                                                          | Q8NDY3     |
|     |                |       |                                  |                                                                                                                                                          | A8K6X2     |
|     |                |       |                                  |                                                                                                                                                          | B4E341     |
|     |                |       |                                  |                                                                                                                                                          | C9JZW7     |
|     |                |       |                                  |                                                                                                                                                          | X6RL45     |
| 216 | XM_020633577.1 | L     | <b>S9887_384977</b>              | Labrus bergylta SWI/SNF related, matrix associated, actin dependent regulator of chromatin, subfamily d, member 3 (smarcd3), transcript variant X1, mRNA | A0A090N8Z9 |
|     | XM_020633578.1 |       |                                  | Labrus bergylta SWI/SNF related, matrix associated, actin dependent regulator of chromatin, subfamily d, member 3 (smarcd3), transcript variant X2, mRNA | C9JYI7     |
|     | XM_020633579.1 |       |                                  | Labrus bergylta SWI/SNF related, matrix associated, actin dependent regulator of chromatin, subfamily d, member 3 (smarcd3), transcript variant X3, mRNA | H7C4E9     |
|     | XM_020633580.1 |       |                                  | Labrus bergylta SWI/SNF related, matrix associated, actin dependent regulator of chromatin, subfamily d, member 3 (smarcd3), transcript variant X4, mRNA | F8WBJ3     |
|     | XM_020633581.1 |       |                                  | Labrus bergylta SWI/SNF related, matrix associated, actin dependent regulator of chromatin, subfamily d, member 3 (smarcd3), transcript variant X5, mRNA | Q6STE5     |
| 217 | XM_020633015.1 | L + B | <b>S9899_1841030</b>             | Labrus bergylta syntaxin-2-like (LOC109983340), transcript variant X1, mRNA                                                                              | P32856     |
|     | XM_020633016.1 |       |                                  | Labrus bergylta syntaxin-2-like (LOC109983340), transcript variant X2, mRNA                                                                              | A0A348AY69 |
|     |                |       |                                  |                                                                                                                                                          | J3KNU7     |
| 218 | XM_020646415.1 | L     | <b>S9869_217319</b>              | Labrus bergylta tetraspanin-1-like (LOC109993450), mRNA                                                                                                  | O60635     |
| 219 | XM_010744022.2 | L + B | <b>S10017_344353</b><br><b>9</b> | Larimichthys crocea gamma-aminobutyric acid receptor subunit alpha-5 (LOC104929488), transcript variant X1, mRNA                                         | G3V2Q9     |
|     |                |       |                                  |                                                                                                                                                          | G3V2K2     |
|     |                |       |                                  |                                                                                                                                                          | G3V408     |
|     |                |       |                                  |                                                                                                                                                          | B4E1A2     |
|     |                |       |                                  |                                                                                                                                                          | B4DFX3     |
|     |                |       |                                  |                                                                                                                                                          | G3V2G8     |
|     |                |       |                                  |                                                                                                                                                          | G3V296     |
|     |                |       |                                  |                                                                                                                                                          | G3V2Y5     |

|     |                |       |                      |                                                                                                 |            |
|-----|----------------|-------|----------------------|-------------------------------------------------------------------------------------------------|------------|
|     |                |       |                      |                                                                                                 | P31644     |
| 220 | NM_001303358.1 | L     | <b>S178_234532</b>   | Larimichthys crocea peroxisome proliferator activated receptor alpha (ppara), mRNA              | Q07869     |
| 221 | XM_018695334.1 | L     | <b>S9866_174755</b>  | Lates calcarifer disks large-associated protein 1-like (LOC108896281), mRNA                     | O14490     |
|     |                |       |                      |                                                                                                 | A8MXQ8     |
|     |                |       |                      |                                                                                                 | A0A0A0MTP4 |
|     |                |       |                      |                                                                                                 | A8MYR7     |
|     |                |       |                      |                                                                                                 | G3V543     |
|     |                |       |                      |                                                                                                 | Q6IS01     |
| 222 | XM_018669148.1 | L + B | <b>S9899_1841030</b> | Lates calcarifer syntaxin-2-like (LOC108878442), transcript variant X1, mRNA                    | A0A348AY69 |
|     | XM_018669149.1 |       |                      | Lates calcarifer syntaxin-2-like (LOC108878442), transcript variant X2, mRNA                    | J3KNU7     |
| 223 | XM_017804047.1 | L     | <b>S9966_92994</b>   | Lepidothrix coronata adducin 3 (ADD3), transcript variant X1, mRNA                              | Q9UEY8     |
|     | XM_017804048.1 |       |                      | Lepidothrix coronata adducin 3 (ADD3), transcript variant X2, mRNA                              | Q5VU08     |
|     | XM_017804049.1 |       |                      | Lepidothrix coronata adducin 3 (ADD3), transcript variant X3, mRNA                              |            |
|     | XM_017804050.1 |       |                      | Lepidothrix coronata adducin 3 (ADD3), transcript variant X4, mRNA                              |            |
|     | XM_017804051.1 |       |                      | Lepidothrix coronata adducin 3 (ADD3), transcript variant X5, mRNA                              |            |
| 224 | EU346906.1     | L     | <b>S9929_1038014</b> | Limnionectes kuhlii clone DTWAPC-3 antimicrobial peptide precursor, mRNA, complete cds          |            |
| 225 | XM_021532730.1 | L     | <b>S9966_92994</b>   | Lonchura striata domestica actin related protein 2/3 complex subunit 3 (ARPC3), mRNA            | O15145     |
| 226 | NM_001283244.1 | L     | <b>S9853_2824879</b> | Macaca fascicularis contactin-associated protein-like 4-like (LOC102123544), mRNA               | Q9C0A0     |
|     |                |       |                      |                                                                                                 | E9PDN6     |
|     |                |       |                      |                                                                                                 | A0A087WTA1 |
|     |                |       |                      |                                                                                                 | F5H107     |
|     |                |       |                      |                                                                                                 | A0A0A0MR20 |
| 227 | NM_001283306.1 | L     | <b>S9929_1038014</b> | Macaca fascicularis transmembrane protein 35A (TMEM35), mRNA                                    | Q53FP2     |
|     |                |       |                      |                                                                                                 | Q8NCS4     |
|     |                |       |                      |                                                                                                 | B4DN33     |
| 228 | KY474042.1     | L     | <b>S178_234532</b>   | Macrobrachium rosenbergii Cathepsin B mRNA, complete cds                                        | P07858     |
|     |                |       |                      |                                                                                                 | P04080     |
| 229 | XM_011967421.1 | L     | <b>S178_234532</b>   | Mandrillus leucophaeus KH-type splicing regulatory protein (KHSRP), transcript variant X1, mRNA | A0A087WTP3 |

|     |                |   |                      |                                                                                                     |                                                                                  |
|-----|----------------|---|----------------------|-----------------------------------------------------------------------------------------------------|----------------------------------------------------------------------------------|
|     | XM_011967423.1 |   |                      | Mandrillus leucophaeus KH-type splicing regulatory protein (KHSRP), transcript variant X2, mRNA     | M0R3J3<br>Q92945                                                                 |
| 230 | XM_026295451.1 | H | <b>S9874_1914529</b> | Mastacembelus armatus solute carrier family 10 member 2 (slc10a2), mRNA                             | Q12908                                                                           |
|     | XM_026322167.1 |   |                      | Mastacembelus armatus syntaxin-2-like (LOC113139154), transcript variant X1, mRNA                   | A0A348AY69                                                                       |
|     | XM_026322168.1 |   |                      | Mastacembelus armatus syntaxin-2-like (LOC113139154), transcript variant X2, mRNA                   | J3KNU7<br>Q8N8E1                                                                 |
| 231 | XM_004567917.2 | B | <b>S3317_962</b>     | Maylandia zebra cysteine rich hydrophobic domain 2 (chic2), transcript variant X1, mRNA             | D6RDW7                                                                           |
|     | XM_004567918.2 |   |                      | Maylandia zebra cysteine rich hydrophobic domain 2 (chic2), transcript variant X2, mRNA             | H0Y8H1<br>Q9UKJ5                                                                 |
| 232 | XM_004555468.4 | L | <b>S9853_2824879</b> | Maylandia zebra family with sequence similarity 126 member B (fam126b), transcript variant X1, mRNA | Q8IXS8                                                                           |
|     | XM_004555469.5 |   |                      | Maylandia zebra family with sequence similarity 126 member B (fam126b), transcript variant X2, mRNA | C9JTA1                                                                           |
|     | XM_004555470.5 |   |                      | Maylandia zebra family with sequence similarity 126 member B (fam126b), transcript variant X3, mRNA | C9JNS4                                                                           |
|     | XM_004555472.4 |   |                      | Maylandia zebra family with sequence similarity 126 member B (fam126b), transcript variant X4, mRNA | C9J115                                                                           |
| 233 | XM_004564881.2 | B | <b>S561_8990</b>     | Maylandia zebra potassium voltage-gated channel subfamily A member 1 (LOC101481697), mRNA           | Q09470                                                                           |
| 234 | XM_024800937.1 | L | <b>S533_118016</b>   | Maylandia zebra putative nuclease HARBI1 (LOC112432382), mRNA                                       | E9PK24                                                                           |
|     | XM_024801416.1 |   |                      | Maylandia zebra putative nuclease HARBI1 (LOC112433095), mRNA                                       | E9PQI1                                                                           |
|     | XM_024805100.1 |   |                      | Maylandia zebra putative nuclease HARBI1 (LOC112435979), mRNA                                       |                                                                                  |
|     | XM_024805867.1 |   |                      | Maylandia zebra putative nuclease HARBI1 (LOC112436357), mRNA                                       |                                                                                  |
| 235 | XM_014413520.3 | B | <b>S561_8990</b>     | Maylandia zebra zinc finger BED domain-containing protein 1-like (LOC106676602), mRNA               | O96006<br>C9JXP4                                                                 |
| 236 | XM_025345589.1 | L | <b>S178_234532</b>   | Melanaphis sacchari formin-like protein CG32138 (LOC112598922), transcript variant X1, mRNA         | O95466<br>Q8IVF7<br>Q96PY5<br>F8W1F5<br>K7EK60<br>K7EJE6<br>K7ERL1<br>A0A0A0MR62 |

|     |                |   |                      |                                                                                                                   |            |
|-----|----------------|---|----------------------|-------------------------------------------------------------------------------------------------------------------|------------|
|     |                |   |                      |                                                                                                                   | C9IZY8     |
|     |                |   |                      |                                                                                                                   | K7EMY8     |
|     |                |   |                      |                                                                                                                   | F8VYL1     |
| 237 | EF694540.2     | L | <b>S9853_2824879</b> | Morus nigra isolate MCaM-1 calmodulin 1 mRNA, complete cds                                                        | P0DP23     |
| 238 | NM_028288.5    | L | <b>S9929_1038014</b> | Mus musculus cullin 4B (Cul4b), transcript variant 1, mRNA                                                        | Q13620     |
|     | NM_001110142.1 |   |                      | Mus musculus cullin 4B (Cul4b), transcript variant 2, mRNA                                                        | A6NE76     |
|     |                |   |                      |                                                                                                                   | K4DI93     |
| 239 | BC022634.2     | L | <b>S1100_29850</b>   | Mus musculus cytochrome P450, family 2, subfamily c, polypeptide 65, mRNA (cDNA clone IMAGE:4207800), partial cds | P11712     |
|     |                |   |                      |                                                                                                                   | P33261     |
|     |                |   |                      |                                                                                                                   | P10632     |
|     |                |   |                      |                                                                                                                   | P33260     |
|     |                |   |                      |                                                                                                                   | O15503     |
|     |                |   |                      |                                                                                                                   | O00264     |
|     |                |   |                      |                                                                                                                   | P16435     |
|     |                |   |                      |                                                                                                                   | S5RV20     |
|     |                |   |                      |                                                                                                                   | Q16750     |
|     |                |   |                      |                                                                                                                   | S5RV29     |
|     |                |   |                      |                                                                                                                   | S5R8G8     |
|     |                |   |                      |                                                                                                                   | S5RXA4     |
|     |                |   |                      |                                                                                                                   | S5R8H1     |
|     |                |   |                      |                                                                                                                   | S5RG22     |
|     |                |   |                      |                                                                                                                   | B7Z1F5     |
|     |                |   |                      |                                                                                                                   | Q9UQ59     |
|     |                |   |                      |                                                                                                                   | G3V188     |
|     |                |   |                      |                                                                                                                   | E9PIW6     |
|     |                |   |                      |                                                                                                                   | E9PLI9     |
|     |                |   |                      |                                                                                                                   | Q9UEH3     |
|     |                |   |                      |                                                                                                                   | A0A087X125 |

|     |                |   |                      |                                                                                                                                    |            |
|-----|----------------|---|----------------------|------------------------------------------------------------------------------------------------------------------------------------|------------|
|     |                |   |                      |                                                                                                                                    | Q2XN56     |
|     |                |   |                      |                                                                                                                                    | A0A2R8YF67 |
|     |                |   |                      |                                                                                                                                    | A0A1X9PW77 |
|     |                |   |                      |                                                                                                                                    | A0A1X9PW33 |
| 240 | NM_011156.3    | B | <b>S8943_473</b>     | Mus musculus prolyl endopeptidase (Prep), mRNA                                                                                     | P48147     |
|     |                |   |                      |                                                                                                                                    | H0Y5Y0     |
| 241 | BC085143.1     | L | <b>S9929_1038014</b> | Mus musculus serine (or cysteine) peptidase inhibitor, clade H, member 1, mRNA (cDNA clone MGC:109669 IMAGE:6415383), complete cds | Q53YY1     |
| 242 | BC082807.1     | L | <b>S9853_2824879</b> | Mus musculus trafficking protein, kinesin binding 1, mRNA (cDNA clone IMAGE:6402633), partial cds                                  | Q9UPV9     |
| 243 | XM_013053922.1 | L | <b>S178_234532</b>   | Mustela putorius furo KIAA1109 ortholog (KIAA1109), transcript variant X1, mRNA                                                    | H7C0G8     |
|     | XM_013053923.1 |   |                      | Mustela putorius furo KIAA1109 ortholog (KIAA1109), transcript variant X2, mRNA                                                    | H0Y781     |
|     | XM_013053924.1 |   |                      | Mustela putorius furo KIAA1109 ortholog (KIAA1109), transcript variant X3, mRNA                                                    | H3BLT5     |
|     | XM_013053925.1 |   |                      | Mustela putorius furo KIAA1109 ortholog (KIAA1109), transcript variant X4, mRNA                                                    | H7C0Y8     |
|     | XM_013053926.1 |   |                      | Mustela putorius furo KIAA1109 ortholog (KIAA1109), transcript variant X5, mRNA                                                    | H7C121     |
|     | XM_013053927.1 |   |                      | Mustela putorius furo KIAA1109 ortholog (KIAA1109), transcript variant X6, mRNA                                                    | H7C3N8     |
|     | XM_004747974.2 |   |                      | Mustela putorius furo KIAA1109 ortholog (KIAA1109), transcript variant X7, mRNA                                                    | H7C2X5     |
|     |                |   |                      |                                                                                                                                    | L8ECG0     |
|     |                |   |                      |                                                                                                                                    | Q2LD37     |
| 244 | XM_005884976.2 | L | <b>S897_124935</b>   | Myotis brandtii thymosin beta-4 (LOC102243622), transcript variant X1, mRNA                                                        | O14604     |
|     |                |   |                      |                                                                                                                                    | P62328     |
| 245 | XM_024734237.1 | L | <b>S9966_776829</b>  | Neophocaena asiaeorientalis asiaeorientalis protein tyrosine phosphatase, receptor type D (PTPRD), transcript variant X1, mRNA     | P23468     |
|     | XM_024734238.1 |   |                      | Neophocaena asiaeorientalis asiaeorientalis protein tyrosine phosphatase, receptor type D (PTPRD), transcript variant X2, mRNA     | Q3KPI9     |
|     | XM_024734239.1 |   |                      | Neophocaena asiaeorientalis asiaeorientalis protein tyrosine phosphatase, receptor type D (PTPRD), transcript variant X3, mRNA     | F5GWR7     |
|     | XM_024734241.1 |   |                      | Neophocaena asiaeorientalis asiaeorientalis protein tyrosine phosphatase, receptor type D (PTPRD), transcript variant X4, mRNA     | Q2HXI4     |
|     | XM_024734242.1 |   |                      | Neophocaena asiaeorientalis asiaeorientalis protein tyrosine phosphatase, receptor type D (PTPRD), transcript variant X5, mRNA     | C9J8S8     |
|     | XM_024734243.1 |   |                      | Neophocaena asiaeorientalis asiaeorientalis protein tyrosine phosphatase, receptor type D (PTPRD), transcript variant X6, mRNA     | C9J6E4     |
|     | XM_024734244.1 |   |                      | Neophocaena asiaeorientalis asiaeorientalis protein tyrosine phosphatase, receptor type D (PTPRD), transcript variant X7, mRNA     | A0A1B0GU15 |
|     | XM_024734245.1 |   |                      | Neophocaena asiaeorientalis asiaeorientalis protein tyrosine phosphatase, receptor type D (PTPRD), transcript variant X8, mRNA     | A0A1Y0ZJV0 |

|     |                                  |       |                      |                                                                                                                                                                          | A0A1Y0ZSN9                                                                                                                                                                               |
|-----|----------------------------------|-------|----------------------|--------------------------------------------------------------------------------------------------------------------------------------------------------------------------|------------------------------------------------------------------------------------------------------------------------------------------------------------------------------------------|
| 246 | XM_009624257.2                   | L     | <b>S9866_174755</b>  | Nicotiana tomentosiformis ubiquitin carboxyl-terminal hydrolase 2 (LOC104113935), mRNA                                                                                   | O75604                                                                                                                                                                                   |
| 247 | XM_015970797.1                   | L     | <b>S4811_4274</b>    | Nothobranchius furzeri FYN-binding protein-like (LOC107392791), mRNA                                                                                                     | A0A024R032<br>D6RFJ5<br>D6RER7<br>D6RAE8<br>A0A2R8YEE1<br>D6RC38<br>Q5VWT5<br>O15117                                                                                                     |
| 248 | XM_015966627.1                   | L     | <b>S430_235378</b>   | Nothobranchius furzeri polypeptide N-acetylgalactosaminyltransferase 13 (galnt13), transcript variant X3, mRNA                                                           | Q8IUC8<br>A0A1L4BJC0<br>A0A1L4BJA6<br>A0A1L4BJA9<br>A0A1L4BJA8<br>A0A1L4BJ91<br>A0A1L4BJB1<br>A0A1L4BJB0<br>X5DRI3<br>H7C2I5<br>Q68VJ0<br>H7C0T6<br>H7BZU4<br>H7BZG2<br>C9JLI4<br>L8ECM1 |
| 249 | XM_015972117.1<br>XM_015972118.1 | L + B | <b>S9899_1841030</b> | Nothobranchius furzeri syntaxin-2-like (LOC107393623), transcript variant X1, mRNA<br>Nothobranchius furzeri syntaxin-2-like (LOC107393623), transcript variant X2, mRNA | A0A348AY69<br>J3KNU7                                                                                                                                                                     |

|     |                |       |                      |                                                                                                                                          |            |
|-----|----------------|-------|----------------------|------------------------------------------------------------------------------------------------------------------------------------------|------------|
|     |                |       |                      |                                                                                                                                          | Q8N8E1     |
| 250 | XM_015956815.1 | B     | <b>S9856_2465434</b> | Nothobranchius furzeri tensin 3 (tns3), transcript variant X1, mRNA                                                                      | Q68CZ2     |
|     | XM_015956817.1 |       |                      | Nothobranchius furzeri tensin 3 (tns3), transcript variant X2, mRNA                                                                      | C9JHU5     |
|     | XM_015956818.1 |       |                      | Nothobranchius furzeri tensin 3 (tns3), transcript variant X3, mRNA                                                                      | C9JUW5     |
|     | XM_015956819.1 |       |                      | Nothobranchius furzeri tensin 3 (tns3), transcript variant X4, mRNA                                                                      | C9JTD0     |
|     | XM_015956820.1 |       |                      | Nothobranchius furzeri tensin 3 (tns3), transcript variant X5, mRNA                                                                      | C9JWN9     |
|     |                |       |                      |                                                                                                                                          | H7BZ64     |
| 251 | XM_015969238.1 | L     | <b>S703_83370</b>    | Nothobranchius furzeri transient receptor potential cation channel subfamily M member 4-like (LOC107391796), transcript variant X1, mRNA | Q8TD43     |
| 252 | XM_010788027.1 | L     | <b>S99_447176</b>    | Notothenia coriiceps CDK5 regulatory subunit associated protein 1-like 1 (cdkal1), partial mRNA                                          | P06239     |
|     |                |       |                      |                                                                                                                                          | Q5VV42     |
| 253 | XM_004405919.2 | L     | <b>S9966_776829</b>  | Odobenus rosmarus divergens protein tyrosine phosphatase, receptor type, D (PTPRD), transcript variant X1, mRNA                          | P23468     |
|     | XM_012564335.1 |       |                      | Odobenus rosmarus divergens protein tyrosine phosphatase, receptor type, D (PTPRD), transcript variant X2, mRNA                          | Q3KPI9     |
|     | XM_004405920.2 |       |                      | Odobenus rosmarus divergens protein tyrosine phosphatase, receptor type, D (PTPRD), transcript variant X3, mRNA                          | F5GWR7     |
|     | XM_004405921.2 |       |                      | Odobenus rosmarus divergens protein tyrosine phosphatase, receptor type, D (PTPRD), transcript variant X4, mRNA                          | Q2HXI4     |
|     | XM_004405922.2 |       |                      | Odobenus rosmarus divergens protein tyrosine phosphatase, receptor type, D (PTPRD), transcript variant X5, mRNA                          | C9J8S8     |
|     | XM_004405923.2 |       |                      | Odobenus rosmarus divergens protein tyrosine phosphatase, receptor type, D (PTPRD), transcript variant X6, mRNA                          | C9J6E4     |
|     |                |       |                      |                                                                                                                                          | A0A1B0GU15 |
|     |                |       |                      |                                                                                                                                          | A0A1Y0ZJV0 |
|     |                |       |                      |                                                                                                                                          | A0A1Y0ZSN9 |
| 254 | XM_021619932.1 | L + B | <b>S9899_1841030</b> | Oncorhynchus mykiss syntaxin-2-like (LOC110535060), mRNA                                                                                 | A0A348AY69 |
|     |                |       |                      |                                                                                                                                          | J3KNU7     |
|     |                |       |                      |                                                                                                                                          | Q8N8E1     |
| 255 | XR_003218842.1 | L     | <b>S9951_65613</b>   | Oreochromis niloticus coxsackievirus and adenovirus receptor homolog (LOC102079545), transcript variant X1, misc_RNA                     | O75970     |
|     | XR_002061251.2 |       |                      | Oreochromis niloticus coxsackievirus and adenovirus receptor homolog (LOC102079545), transcript variant X2, misc_RNA                     |            |
| 256 | XM_013273808.3 | H     | <b>S217_136844</b>   | Oreochromis niloticus cystic fibrosis transmembrane conductance regulator (cftr), transcript variant X1, mRNA                            | P13569     |
|     | XM_003449170.5 |       |                      | Oreochromis niloticus cystic fibrosis transmembrane conductance regulator (cftr), transcript variant X2, mRNA                            | A0A024R730 |
|     |                |       |                      |                                                                                                                                          | Q20BJ8     |

|     |                |   |                     |                                                                                                                                                                                                                                                                                                             |            |
|-----|----------------|---|---------------------|-------------------------------------------------------------------------------------------------------------------------------------------------------------------------------------------------------------------------------------------------------------------------------------------------------------|------------|
|     |                |   |                     |                                                                                                                                                                                                                                                                                                             | Q20BI4     |
|     |                |   |                     |                                                                                                                                                                                                                                                                                                             | Q20BH0     |
|     |                |   |                     |                                                                                                                                                                                                                                                                                                             | Q2I0A9     |
|     |                |   |                     |                                                                                                                                                                                                                                                                                                             | Q2I0A3     |
|     |                |   |                     |                                                                                                                                                                                                                                                                                                             | Q20BI6     |
| 257 | XM_025910860.1 | L | <b>S2711_3408</b>   | Oreochromis niloticus opioid-binding protein/cell adhesion molecule homolog (LOC100703630), transcript variant X1, mRNA                                                                                                                                                                                     | Q14982     |
|     | XM_019363978.2 |   |                     | Oreochromis niloticus opioid-binding protein/cell adhesion molecule homolog (LOC100703630), transcript variant X2, mRNA                                                                                                                                                                                     | Q5IS61     |
|     | XM_005454557.4 |   |                     | Oreochromis niloticus opioid-binding protein/cell adhesion molecule homolog (LOC100703630), transcript variant X3, mRNA                                                                                                                                                                                     | A8K0Y0     |
|     |                |   |                     |                                                                                                                                                                                                                                                                                                             | B7ZLQ0     |
|     |                |   |                     |                                                                                                                                                                                                                                                                                                             | Q6B0I4     |
|     |                |   |                     |                                                                                                                                                                                                                                                                                                             | B2CZX3     |
| 258 | XM_005458391.4 | L | <b>S9888_466590</b> | Oreochromis niloticus protein FAM19A2 (LOC100704992), transcript variant X1, mRNA                                                                                                                                                                                                                           | F8VZY8     |
|     | XM_025907347.1 |   |                     | Oreochromis niloticus protein FAM19A2 (LOC100704992), transcript variant X2, mRNA                                                                                                                                                                                                                           | F8VVF9     |
|     |                |   |                     |                                                                                                                                                                                                                                                                                                             | F8VWB2     |
|     |                |   |                     |                                                                                                                                                                                                                                                                                                             | A0A0C4DGI5 |
|     |                |   |                     |                                                                                                                                                                                                                                                                                                             | F8VVD7     |
|     |                |   |                     |                                                                                                                                                                                                                                                                                                             | Q8N3H0     |
| 259 | XM_019367491.2 | H | <b>S1043_75350</b>  | Oreochromis niloticus putative nuclease HARBI1 (LOC100692127), mRNA                                                                                                                                                                                                                                         | E9PK24     |
|     | XM_019349300.1 |   |                     | Oreochromis niloticus putative nuclease HARBI1 (LOC109196088), mRNA                                                                                                                                                                                                                                         | E9PQI1     |
|     | XM_019361975.2 |   |                     | Oreochromis niloticus putative nuclease HARBI1 (LOC109202968), mRNA                                                                                                                                                                                                                                         |            |
| 260 | XM_005450780.4 | L | <b>S178_234532</b>  | Oreochromis niloticus transcription factor SOX-4 (LOC100692790), mRNA                                                                                                                                                                                                                                       | Q06945     |
| 261 | AB270897.1     | B | <b>S561_8990</b>    | Oreochromis niloticus MHC class IA antigen UBA1, UBA2, UAA1 genes, partial cds, UAA3 and UAA2 pseudogenes, UAA4, UAA5 and UAA6 pseudogene fragments                                                                                                                                                         | Q95460     |
| 262 | AB649032.1     | B | <b>S561_8990</b>    | Oreochromis niloticus vasa gene, clone: b04TI071H03                                                                                                                                                                                                                                                         | Q9NQI0     |
| 263 | AB909496.1     | B | <b>S371_298559</b>  | Oryzias dancena Gpr112, Map7d2, Sox3, P2ry4, Inpp1b, Arr3 genes for G protein-coupled receptor 112, MAP7 domain containing 2, SRY-box containing transcription factor 3, G-protein coupled pyrimidinergic receptor P2Y4, inositol polyphosphate phosphatase-like 1b, arrestin 3, complete cds, chromosome X | Q8IZF6     |
|     |                |   |                     |                                                                                                                                                                                                                                                                                                             | Q96T17     |
|     |                |   |                     |                                                                                                                                                                                                                                                                                                             | A0A0M4F6E1 |
|     |                |   |                     |                                                                                                                                                                                                                                                                                                             | A0A0M4FLI9 |



|     |                |       |                      |                                                                                                        |            |
|-----|----------------|-------|----------------------|--------------------------------------------------------------------------------------------------------|------------|
|     |                |       |                      |                                                                                                        | A0A0K1JS24 |
|     |                |       |                      |                                                                                                        | P41225     |
|     |                |       |                      |                                                                                                        | P51582     |
|     |                |       |                      |                                                                                                        | C6G7W3     |
|     |                |       |                      |                                                                                                        | C6G7W4     |
|     |                |       |                      |                                                                                                        | P36575     |
|     |                |       |                      |                                                                                                        | D6RCT3     |
|     |                |       |                      |                                                                                                        | A0A087WWQ5 |
| 264 | XM_023957995.1 | H     | <b>S9889_2454843</b> | Oryzias latipes FAT atypical cadherin 1 (fat1), transcript variant X1, mRNA                            | H0Y9H4     |
|     | XM_023958002.1 |       |                      | Oryzias latipes FAT atypical cadherin 1 (fat1), transcript variant X2, mRNA                            | H0Y9C8     |
|     | XM_023958005.1 |       |                      | Oryzias latipes FAT atypical cadherin 1 (fat1), transcript variant X3, mRNA                            | H0Y8F5     |
|     | XM_023958007.1 |       |                      | Oryzias latipes FAT atypical cadherin 1 (fat1), transcript variant X4, mRNA                            | D6RHE6     |
|     | XM_023958011.1 |       |                      | Oryzias latipes FAT atypical cadherin 1 (fat1), transcript variant X5, mRNA                            | L8E7S1     |
|     | XM_023958018.1 |       |                      | Oryzias latipes FAT atypical cadherin 1 (fat1), transcript variant X6, mRNA                            | D6RCE4     |
|     | XM_023958025.1 |       |                      | Oryzias latipes FAT atypical cadherin 1 (fat1), transcript variant X7, mRNA                            | A0A087WVP1 |
|     |                |       |                      |                                                                                                        | Q14517     |
| 265 | XM_023954283.1 | B     | <b>S371_298559</b>   | Oryzias latipes occludin (LOC101169436), mRNA                                                          | Q16625     |
|     |                |       |                      |                                                                                                        | A0A0G2JMZ8 |
| 266 | XM_004066447.4 | B     | <b>S1073_18989</b>   | Oryzias latipes T-cell surface glycoprotein CD3 zeta chain (LOC101175223), transcript variant X1, mRNA | P20963     |
|     | XM_011482744.3 |       |                      | Oryzias latipes T-cell surface glycoprotein CD3 zeta chain (LOC101175223), transcript variant X2, mRNA | P14079     |
| 267 | XM_011480878.3 | B     | <b>S1073_18989</b>   | Oryzias latipes tax1-binding protein 1 homolog A (LOC101173317), transcript variant X1, mRNA           | P03409     |
|     | XM_020707130.2 |       |                      | Oryzias latipes tax1-binding protein 1 homolog A (LOC101173317), transcript variant X2, mRNA           | P0C213     |
|     |                |       |                      |                                                                                                        | P0C222     |
| 268 | XM_011484681.3 | B     | <b>S371_298559</b>   | Oryzias latipes zinc transporter ZIP9 (LOC101163600), mRNA                                             | Q9NUM3     |
| 269 | XM_024275231.1 | L + B | <b>S9899_1841030</b> | Oryzias melastigma syntaxin-2-like (LOC112148272), mRNA                                                | A0A348AY69 |
|     |                |       |                      |                                                                                                        | J3KNU7     |
|     |                |       |                      |                                                                                                        | Q8N8E1     |
|     |                |       |                      |                                                                                                        | O75970     |

|     |                |   |                    |                                                                            |                                                                                                            |
|-----|----------------|---|--------------------|----------------------------------------------------------------------------|------------------------------------------------------------------------------------------------------------|
| 270 | DQ084040.1     | L | <b>S1100_29850</b> | Oxyuranus scutellatus 60S ribosomal protein L13a mRNA, partial cds         | P40429                                                                                                     |
| 271 | MF403004.1     | L | <b>S9966_92994</b> | Palaemon carinicauda beta carbonic anhydrase mRNA, complete cds            | P23280<br>P00918<br>P00915<br>P22748<br>P07451<br>O43570<br>Q16790<br>Q9ULX7<br>P35219<br>P43166<br>Q8N1Q1 |
| 272 | XM_024929407.1 | B | <b>S8943_473</b>   | Pan paniscus tripartite motif containing 33 (TRIM33), mRNA                 | A0A024R0F6<br>H0Y612<br>Q9UPN9                                                                             |
| 273 | XM_024354201.1 | H | <b>S217_136844</b> | Pan troglodytes ENAH, actin regulator (ENAH), transcript variant X1, mRNA  | Q8N8S7                                                                                                     |
|     | XM_024354219.1 |   |                    | Pan troglodytes ENAH, actin regulator (ENAH), transcript variant X10, mRNA | A0A0U1RRM6                                                                                                 |
|     | XM_016939738.2 |   |                    | Pan troglodytes ENAH, actin regulator (ENAH), transcript variant X11, mRNA | A0A075B6E5                                                                                                 |
|     | XM_016939742.2 |   |                    | Pan troglodytes ENAH, actin regulator (ENAH), transcript variant X12, mRNA | A0A0U1RQP7                                                                                                 |
|     | XM_016939762.2 |   |                    | Pan troglodytes ENAH, actin regulator (ENAH), transcript variant X13, mRNA | A0A097PIC4                                                                                                 |
|     | XM_016939767.2 |   |                    | Pan troglodytes ENAH, actin regulator (ENAH), transcript variant X14, mRNA |                                                                                                            |
|     | XM_016939773.2 |   |                    | Pan troglodytes ENAH, actin regulator (ENAH), transcript variant X15, mRNA |                                                                                                            |
|     | XM_016939783.2 |   |                    | Pan troglodytes ENAH, actin regulator (ENAH), transcript variant X16, mRNA |                                                                                                            |
|     | XM_016939785.2 |   |                    | Pan troglodytes ENAH, actin regulator (ENAH), transcript variant X17, mRNA |                                                                                                            |
|     | XM_016939788.2 |   |                    | Pan troglodytes ENAH, actin regulator (ENAH), transcript variant X18, mRNA |                                                                                                            |
|     | XM_024354202.1 |   |                    | Pan troglodytes ENAH, actin regulator (ENAH), transcript variant X2, mRNA  |                                                                                                            |
|     | XM_024354210.1 |   |                    | Pan troglodytes ENAH, actin regulator (ENAH), transcript variant X4, mRNA  |                                                                                                            |
|     | XM_024354211.1 |   |                    | Pan troglodytes ENAH, actin regulator (ENAH), transcript variant X5, mRNA  |                                                                                                            |
|     | XM_024354212.1 |   |                    | Pan troglodytes ENAH, actin regulator (ENAH), transcript variant X6, mRNA  |                                                                                                            |

|     |                |       |                      |                                                                                                                          |                                      |
|-----|----------------|-------|----------------------|--------------------------------------------------------------------------------------------------------------------------|--------------------------------------|
|     | XM_024354215.1 |       |                      | Pan troglodytes ENAH, actin regulator (ENAH), transcript variant X8, mRNA                                                |                                      |
|     | XM_024354218.1 |       |                      | Pan troglodytes ENAH, actin regulator (ENAH), transcript variant X9, mRNA                                                |                                      |
| 274 | XM_026929900.1 | L     | <b>S9906_191627</b>  | Pangasianodon hypophthalmus actin related protein 2/3 complex subunit 1A (arpc1a), mRNA                                  | Q92747<br>E9PF58<br>Q75MY0           |
| 275 | XM_026909765.1 | L     | <b>S10156_378391</b> | Pangasianodon hypophthalmus NLR family CARD domain-containing protein 3-like (LOC113523735), transcript variant X5, mRNA | Q7RTR2<br>H3BLT9<br>A0A087WZ24       |
| 276 | XM_026913004.1 | L     | <b>S9941_4782742</b> | Pangasianodon hypophthalmus protein-lysine methyltransferase METTL21E-like (LOC113526176), transcript variant X1, mRNA   | A6NDL7                               |
|     | XM_026913005.1 |       |                      | Pangasianodon hypophthalmus protein-lysine methyltransferase METTL21E-like (LOC113526176), transcript variant X2, mRNA   |                                      |
| 277 | XM_019445039.1 | L     | <b>S885_89904</b>    | Panthera pardus solute carrier family 16 member 12 (SLC16A12), mRNA                                                      | Q6ZSM3                               |
| 278 | XM_020093697.1 | L + B | <b>S9899_1841030</b> | Paralichthys olivaceus syntaxin-2-like (LOC109633677), transcript variant X1, mRNA                                       | A0A348AY69                           |
|     | XM_020093698.1 |       |                      | Paralichthys olivaceus syntaxin-2-like (LOC109633677), transcript variant X2, mRNA                                       | J3KNU7                               |
|     | XM_020093699.1 |       |                      | Paralichthys olivaceus syntaxin-2-like (LOC109633677), transcript variant X3, mRNA                                       | Q8N8E1<br>O75970<br>Q12955           |
| 279 | HM100106.1     | L     | <b>S9853_2824879</b> | Paralichthys olivaceus transcription factor PU.1 mRNA, complete cds, alternatively spliced                               | P17947<br>F5H3K6<br>F5GZ94<br>Q13318 |
| 280 | XM_023816282.1 | H     | <b>S9889_2454843</b> | Paramormyrops kingsleyae lysine methyltransferase 2A (kmt2a), mRNA                                                       | Q03164                               |
| 282 | XM_023803392.1 | L     | <b>S468_2218143</b>  | Paramormyrops kingsleyae SLAM family member 5-like (LOC111839455), mRNA                                                  | Q9UIB8                               |
| 283 | XM_006977726.2 | L     | <b>S9866_174755</b>  | Peromyscus maniculatus bairdii zyg-11 family member B, cell cycle regulator (Zyg11b), mRNA                               | Q9C0D3<br>A8DPD7                     |
| 284 | XM_023191319.2 | B     | <b>S3317_962</b>     | Piliocolobus tephrosceles solute carrier family 30 member 7 (SLC30A7), transcript variant X1, mRNA                       | Q8NEW0                               |
|     | XM_023191320.2 |       |                      | Piliocolobus tephrosceles solute carrier family 30 member 7 (SLC30A7), transcript variant X2, mRNA                       | H0Y362                               |
| 285 | XM_016679628.1 | B + H | <b>S368_129091</b>   | Poecilia formosa 2-aminoethanethiol dioxygenase-like (LOC103149020), transcript variant X1, mRNA                         | Q96SZ5                               |

|     |                |   |                      |                                                                                                      |            |
|-----|----------------|---|----------------------|------------------------------------------------------------------------------------------------------|------------|
|     | XM_016679629.1 |   |                      | Poecilia formosa 2-aminoethanethiol dioxygenase-like (LOC103149020), transcript variant X2, mRNA     |            |
| 286 | XM_007541956.2 | L | <b>S1062_14945</b>   | Poecilia formosa butyrophilin subfamily 2 member A1-like (LOC103130540), transcript variant X1, mRNA | Q7KYR7     |
|     | XM_016666006.1 |   |                      | Poecilia formosa butyrophilin subfamily 2 member A1-like (LOC103130540), transcript variant X2, mRNA | H7BYC3     |
|     | XM_016666007.1 |   |                      | Poecilia formosa butyrophilin subfamily 2 member A1-like (LOC103130540), transcript variant X3, mRNA | H7C542     |
|     | XM_016679642.1 |   |                      | Poecilia formosa butyrophilin subfamily 2 member A1-like (LOC103149032), mRNA                        | C9JNC3     |
| 287 | XM_007567174.2 | L | <b>S9941_4782742</b> | Poecilia formosa carnitine O-acetyltransferase-like (LOC103148412), transcript variant X1, mRNA      | P43155     |
| 288 | XM_016671260.1 | L | <b>S9941_4782742</b> | Poecilia formosa lysine-specific demethylase 4C-like (LOC103137779), transcript variant X5, mRNA     | Q9H3R0     |
|     |                |   |                      |                                                                                                      | F8WCN1     |
|     |                |   |                      |                                                                                                      | C9J879     |
|     |                |   |                      |                                                                                                      | A0A0A0MSR6 |
|     |                |   |                      |                                                                                                      | B0QZ60     |
| 289 | XM_007567329.2 | L | <b>S703_83370</b>    | Poecilia formosa mitochondrial uncoupling protein 2-like (LOC103148519), mRNA                        | P55851     |
|     |                |   |                      |                                                                                                      | A0A024R5N5 |
|     |                |   |                      |                                                                                                      | F5GX45     |
|     |                |   |                      |                                                                                                      | H0YFR8     |
|     |                |   |                      |                                                                                                      | H0YFQ0     |
|     |                |   |                      |                                                                                                      | F5H312     |
| 290 | XM_007558891.2 | L | <b>S2711_3408</b>    | Poecilia formosa mitogen-activated protein kinase 10 (mapk10), transcript variant X1, mRNA           | P53779     |
|     | XM_016674757.1 |   |                      | Poecilia formosa mitogen-activated protein kinase 10 (mapk10), transcript variant X2, mRNA           | D6RCB1     |
|     | XM_016674758.1 |   |                      | Poecilia formosa mitogen-activated protein kinase 10 (mapk10), transcript variant X3, mRNA           | A8MWW6     |
|     | XM_016674759.1 |   |                      | Poecilia formosa mitogen-activated protein kinase 10 (mapk10), transcript variant X4, mRNA           | D6RJF9     |
| 291 | XM_007577262.2 | L | <b>S2711_3408</b>    | Poecilia formosa niban-like protein 1 (LOC103155545), transcript variant X1, mRNA                    | Q96TA1     |
|     | XM_016663646.1 |   |                      | Poecilia formosa niban-like protein 1 (LOC103155545), transcript variant X2, mRNA                    |            |
|     | XM_016663647.1 |   |                      | Poecilia formosa niban-like protein 1 (LOC103155545), transcript variant X3, mRNA                    |            |
| 292 | XM_007561714.2 | L | <b>S174_3611515</b>  | Poecilia formosa ras-related protein Rab-38-like (LOC103144640), mRNA                                | P57729     |
|     |                |   |                      |                                                                                                      | H0YDB7     |
|     |                |   |                      |                                                                                                      | H0YEA4     |
| 293 | XM_007540708.2 | L | <b>S174_3611515</b>  | Poecilia formosa round spermatid basic protein 1-like (LOC103129554), mRNA                           | Q5VWQ0     |

|     |                |       |                      |                                                                                                    |            |
|-----|----------------|-------|----------------------|----------------------------------------------------------------------------------------------------|------------|
|     |                |       |                      |                                                                                                    | Q6PCB5     |
|     |                |       |                      |                                                                                                    | C9JM20     |
|     |                |       |                      |                                                                                                    | H7C2D3     |
|     |                |       |                      |                                                                                                    | A0A0C4DH79 |
| 294 | XM_007572875.1 | L     | <b>S1_2497140</b>    | Poecilia formosa sushi domain containing 1 (susd1), mRNA                                           | F8WAQ1     |
|     |                |       |                      |                                                                                                    | H3BLV4     |
|     |                |       |                      |                                                                                                    | H0Y6B2     |
|     |                |       |                      |                                                                                                    | H0YCH6     |
| 295 | XM_007567117.2 | L + B | <b>S9899_1841030</b> | Poecilia formosa syntaxin-2 (LOC103148388), transcript variant X1, mRNA                            | A0A348AY69 |
|     | XM_007567118.2 |       |                      | Poecilia formosa syntaxin-2 (LOC103148388), transcript variant X2, mRNA                            | J3KNU7     |
|     |                |       |                      |                                                                                                    | Q8N8E1     |
|     |                |       |                      |                                                                                                    | O75970     |
|     |                |       |                      |                                                                                                    | Q12955     |
| 296 | XM_007562325.2 | L + H | <b>S42_249281</b>    | Poecilia formosa thyrotropin releasing hormone (trh), transcript variant X1, mRNA                  | A0A146Z4D1 |
|     | XM_016676477.1 |       |                      | Poecilia formosa thyrotropin releasing hormone (trh), transcript variant X2, mRNA                  | A0A147AU48 |
|     |                |       |                      |                                                                                                    | A0A147B357 |
|     |                |       |                      |                                                                                                    | A0A146ZXW2 |
|     |                |       |                      |                                                                                                    | A0A146YGA5 |
|     |                |       |                      |                                                                                                    | A0A147AVL5 |
|     |                |       |                      |                                                                                                    | A0A146SP16 |
|     |                |       |                      |                                                                                                    | A0A146VYC6 |
| 297 | XM_007551204.2 | L     | <b>S2711_3408</b>    | Poecilia formosa transmembrane protein 26 (tmem26), mRNA                                           | H7BXI3     |
|     |                |       |                      |                                                                                                    | Q6ZUK4     |
| 298 | XM_015052885.1 | B + H | <b>S368_129091</b>   | Poecilia latipinna 2-aminoethanethiol dioxygenase-like (LOC106959984), transcript variant X1, mRNA | Q96SZ5     |
|     | XM_015052886.1 |       |                      | Poecilia latipinna 2-aminoethanethiol dioxygenase-like (LOC106959984), transcript variant X2, mRNA | Q7KYR7     |
| 299 | XM_015022562.1 | L     | <b>S1062_14945</b>   | Poecilia latipinna butyrophilin subfamily 2 member A1-like (LOC106939965), mRNA                    | H7BYC3     |
|     | XM_015032189.1 |       |                      | Poecilia latipinna butyrophilin subfamily 2 member A1-like (LOC106947292), mRNA                    | H7C542     |
|     |                |       |                      |                                                                                                    | C9JNC3     |
| 300 | XM_015024325.1 | L     | <b>S1062_14945</b>   | Poecilia latipinna carnitine O-acetyltransferase-like (LOC106941341), transcript variant X1, mRNA  | P43155     |

|     |                |   |                    |                                                                                                                                  |            |
|-----|----------------|---|--------------------|----------------------------------------------------------------------------------------------------------------------------------|------------|
| 301 | XM_015041198.1 | H | <b>S217_136844</b> | Poecilia latipinna integrin beta 6 (itgb6), transcript variant X1, mRNA                                                          | P18564     |
|     | XM_015041199.1 |   |                    | Poecilia latipinna integrin beta 6 (itgb6), transcript variant X2, mRNA                                                          | A0A087WXP3 |
|     | XM_015041200.1 |   |                    | Poecilia latipinna integrin beta 6 (itgb6), transcript variant X3, mRNA                                                          | E9PEE8     |
|     | XM_015041201.1 |   |                    | Poecilia latipinna integrin beta 6 (itgb6), transcript variant X4, mRNA                                                          | F8WBJ8     |
| 302 | XM_015043850.1 | H | <b>S217_136844</b> | Poecilia latipinna lysine-specific demethylase 4C-like (LOC106954381), transcript variant X6, mRNA                               | Q9H3R0     |
|     |                |   |                    |                                                                                                                                  | F8WCN1     |
|     |                |   |                    |                                                                                                                                  | C9J879     |
|     |                |   |                    |                                                                                                                                  | A0A0A0MSR6 |
|     |                |   |                    |                                                                                                                                  | B0QZ60     |
| 303 | XM_015041133.1 | L | <b>S703_83370</b>  | Poecilia latipinna mitochondrial uncoupling protein 2-like (LOC106952793), mRNA                                                  | P55851     |
|     |                |   |                    |                                                                                                                                  | A0A024R5N5 |
|     |                |   |                    |                                                                                                                                  | F5GX45     |
|     |                |   |                    |                                                                                                                                  | H0YFR8     |
|     |                |   |                    |                                                                                                                                  | H0YFQ0     |
|     |                |   |                    |                                                                                                                                  | F5H312     |
| 304 | XM_015045411.1 | L | <b>S703_83370</b>  | Poecilia latipinna mucin-5AC-like (LOC106955308), mRNA                                                                           | P98088     |
|     |                |   |                    |                                                                                                                                  | T1R7M6     |
|     |                |   |                    |                                                                                                                                  | T1R7A8     |
|     |                |   |                    |                                                                                                                                  | T1R7N1     |
|     |                |   |                    |                                                                                                                                  | T1R7N3     |
|     |                |   |                    |                                                                                                                                  | Q96DU6     |
| 305 | XM_015019529.1 | L | <b>S2711_3408</b>  | Poecilia latipinna niban-like protein 1 (LOC106937818), transcript variant X1, mRNA                                              | Q96TA1     |
|     | XM_015019531.1 |   |                    | Poecilia latipinna niban-like protein 1 (LOC106937818), transcript variant X2, mRNA                                              |            |
|     | XM_015019532.1 |   |                    | Poecilia latipinna niban-like protein 1 (LOC106937818), transcript variant X3, mRNA                                              |            |
| 306 | XM_015035724.1 | L | <b>S9966_92994</b> | Poecilia latipinna phosphatidylinositol-4,5-bisphosphate 3-kinase, catalytic subunit delta (pik3cd), transcript variant X1, mRNA | O00329     |
|     | XM_015035725.1 |   |                    | Poecilia latipinna phosphatidylinositol-4,5-bisphosphate 3-kinase, catalytic subunit delta (pik3cd), transcript variant X2, mRNA | Q5SR50     |
|     |                |   |                    |                                                                                                                                  | F8W9P4     |
|     |                |   |                    |                                                                                                                                  | A0A2K8FKV1 |
|     |                |   |                    |                                                                                                                                  | A7E2E0     |

|     |                |       |                      |                                                                                                               |  |            |
|-----|----------------|-------|----------------------|---------------------------------------------------------------------------------------------------------------|--|------------|
|     |                |       |                      |                                                                                                               |  | B7ZM44     |
|     |                |       |                      |                                                                                                               |  | A0A2K8FKT1 |
|     |                |       |                      |                                                                                                               |  | A0A2K8FKR1 |
|     |                |       |                      |                                                                                                               |  | A0A2K8FKQ1 |
| 307 | XM_015055566.1 | L     | <b>S174_3611515</b>  | Poecilia latipinna round spermatid basic protein 1-like (LOC106961678), mRNA                                  |  | Q5VWQ0     |
|     |                |       |                      |                                                                                                               |  | Q6PCB5     |
|     |                |       |                      |                                                                                                               |  | C9JM20     |
|     |                |       |                      |                                                                                                               |  | H7C2D3     |
|     |                |       |                      |                                                                                                               |  | A0A0C4DH79 |
| 308 | XM_015015672.1 | L + B | <b>S9899_1841030</b> | Poecilia latipinna syntaxin-2-like (LOC106935276), transcript variant X1, mRNA                                |  | P43155     |
|     | XM_015015673.1 |       |                      | Poecilia latipinna syntaxin-2-like (LOC106935276), transcript variant X2, mRNA                                |  | A0A147AU48 |
| 309 | XM_015033403.1 | L + H | <b>S42_249281</b>    | Poecilia latipinna thyrotropin-releasing hormone (trh), transcript variant X1, mRNA                           |  | A0A147B357 |
|     | XM_015033404.1 |       |                      | Poecilia latipinna thyrotropin-releasing hormone (trh), transcript variant X2, mRNA                           |  | A0A146ZXW2 |
|     |                |       |                      |                                                                                                               |  | A0A146YGA5 |
|     |                |       |                      |                                                                                                               |  | A0A147AVL5 |
|     |                |       |                      |                                                                                                               |  | A0A146SP16 |
|     |                |       |                      |                                                                                                               |  | A0A146VYC6 |
| 310 | XM_014975057.1 | H     | <b>S490_150742</b>   | Poecilia mexicana 1-phosphatidylinositol 4,5-bisphosphate phosphodiesterase delta-4-like (LOC106908831), mRNA |  | Q9BRC7     |
|     |                |       |                      |                                                                                                               |  | H7C237     |
|     |                |       |                      |                                                                                                               |  | H7C281     |
|     |                |       |                      |                                                                                                               |  | C9JAE4     |
|     |                |       |                      |                                                                                                               |  | F2Z3H8     |
| 311 | XM_014984307.1 | B + H | <b>S368_129091</b>   | Poecilia mexicana 2-aminoethanethiol dioxygenase-like (LOC106916187), transcript variant X1, mRNA             |  | Q7KYR7     |
|     | XM_014984316.1 |       |                      | Poecilia mexicana 2-aminoethanethiol dioxygenase-like (LOC106916187), transcript variant X2, mRNA             |  |            |
| 312 | XM_014984789.1 | L     | <b>S9853_2824879</b> | Poecilia mexicana ALG3, alpha-1,3- mannosyltransferase (alg3), transcript variant X1, mRNA                    |  | Q92685     |
|     | XM_014984790.1 |       |                      | Poecilia mexicana ALG3, alpha-1,3- mannosyltransferase (alg3), transcript variant X2, mRNA                    |  | C9J7S5     |
|     |                |       |                      |                                                                                                               |  | H7C0X4     |
|     |                |       |                      |                                                                                                               |  | 8WE30      |

|     |                |   |                           |                                                                                                   |            |
|-----|----------------|---|---------------------------|---------------------------------------------------------------------------------------------------|------------|
|     |                |   |                           |                                                                                                   | H7BZZ2     |
|     |                |   |                           |                                                                                                   | F8WF93     |
| 313 | XM_015001947.1 | L | <b>S1062_14945</b>        | Poecilia mexicana butyrophilin subfamily 1 member A1-like (LOC106926811), mRNA                    | H7BYC3     |
|     | XM_015001954.1 |   |                           | Poecilia mexicana butyrophilin subfamily 1 member A1-like (LOC106926817), mRNA                    | H7C542     |
| 314 | XM_014976611.1 | L | <b>S1062_14945</b>        | Poecilia mexicana butyrophilin-like protein 2 (LOC106910057), transcript variant X1, mRNA         | C9JNC3     |
|     | XM_014976612.1 |   |                           | Poecilia mexicana butyrophilin-like protein 2 (LOC106910057), transcript variant X2, mRNA         |            |
|     | XM_014976613.1 |   |                           | Poecilia mexicana butyrophilin-like protein 2 (LOC106910057), transcript variant X3, mRNA         |            |
| 315 | XM_015002937.1 | L | <b>S9941_4782742</b>      | Poecilia mexicana carnitine O-acetyltransferase-like (LOC106927398), transcript variant X1, mRNA  | P43155     |
| 316 | XM_014981515.1 | L | <b>S9869_217319</b>       | Poecilia mexicana interleukin-18 receptor 1-like (LOC106914618), mRNA                             | O95256     |
|     |                |   |                           |                                                                                                   | Q14116     |
|     |                |   |                           |                                                                                                   | O95998     |
| 317 | XM_014988676.1 | L | <b>S9941_4782742</b>      | Poecilia mexicana lysine-specific demethylase 4C-like (LOC106918705), transcript variant X5, mRNA | Q9H3R0     |
|     |                |   |                           |                                                                                                   | F8WCN1     |
|     |                |   |                           |                                                                                                   | C9J879     |
|     |                |   |                           |                                                                                                   | A0A0A0MSR6 |
| 318 | XM_015003443.1 | L | <b>S703_83370</b>         | Poecilia mexicana mitochondrial uncoupling protein 2-like (LOC106927699), mRNA                    | B0QZ60     |
|     |                |   |                           |                                                                                                   | P55851     |
|     |                |   |                           |                                                                                                   | A0A024R5N5 |
|     |                |   |                           |                                                                                                   | F5GX45     |
|     |                |   |                           |                                                                                                   | H0YFR8     |
|     |                |   |                           |                                                                                                   | H0YFQ0     |
|     |                |   |                           |                                                                                                   | F5H312     |
| 319 | XM_014971399.1 | L | <b>S2711_3408</b>         | Poecilia mexicana niban-like protein 1 (LOC106906223), transcript variant X1, mRNA                | Q96TA1     |
|     | XM_014971400.1 |   |                           | Poecilia mexicana niban-like protein 1 (LOC106906223), transcript variant X2, mRNA                |            |
| 320 | XM_014995514.1 | L | <b>S10010_101246</b><br>6 | Poecilia mexicana p21 protein (Cdc42/Rac)-activated kinase 4 (pak4), transcript variant X1, mRNA  | A0A024R0J1 |
|     | XM_014995515.1 |   |                           | Poecilia mexicana p21 protein (Cdc42/Rac)-activated kinase 4 (pak4), transcript variant X2, mRNA  | A0A024R0L8 |
|     |                |   |                           |                                                                                                   | M0R1R1     |
|     |                |   |                           |                                                                                                   | M0R0L9     |



|     |                |       |                      |                                                                                                                                        |            |
|-----|----------------|-------|----------------------|----------------------------------------------------------------------------------------------------------------------------------------|------------|
|     |                |       |                      |                                                                                                                                        | M0R2X4     |
|     |                |       |                      |                                                                                                                                        | M0R3G6     |
|     |                |       |                      |                                                                                                                                        | B4DUG0     |
| 321 | XM_014982195.1 | L     | <b>S9866_174755</b>  | Poecilia mexicana RAB11 family interacting protein 4 (class II) (rab11fip4), transcript variant X1, mRNA                               | Q86YS3     |
|     | XM_014982231.1 |       |                      | Poecilia mexicana RAB11 family interacting protein 4 (class II) (rab11fip4), transcript variant X5, mRNA                               | K7EL58     |
|     |                |       |                      |                                                                                                                                        | J3QKR9     |
|     |                |       |                      |                                                                                                                                        | K7EMK3     |
|     |                |       |                      |                                                                                                                                        | J3QLM3     |
|     |                |       |                      |                                                                                                                                        | L8ECL7     |
| 322 | XM_015002153.1 | L     | <b>S174_3611515</b>  | Poecilia mexicana ras-related protein Rab-38-like (LOC106926937), mRNA                                                                 | P57729     |
|     |                |       |                      |                                                                                                                                        | H0YDB7     |
|     |                |       |                      |                                                                                                                                        | H0YEA4     |
| 323 | XM_015010549.1 | L + B | <b>S9899_1841030</b> | Poecilia mexicana syntaxin-2-like (LOC106932068), transcript variant X1, mRNA                                                          | P43155     |
|     | XM_015010550.1 |       |                      | Poecilia mexicana syntaxin-2-like (LOC106932068), transcript variant X2, mRNA                                                          | A0A147AU48 |
| 324 | XM_015005350.1 | L + H | <b>S42_249281</b>    | Poecilia mexicana thyrotropin-releasing hormone (trh), transcript variant X1, mRNA                                                     | A0A147B357 |
|     | XM_015005351.1 |       |                      | Poecilia mexicana thyrotropin-releasing hormone (trh), transcript variant X2, mRNA                                                     | A0A146ZXW2 |
|     |                |       |                      |                                                                                                                                        | A0A146YGA5 |
|     |                |       |                      |                                                                                                                                        | A0A147AVL5 |
|     |                |       |                      |                                                                                                                                        | A0A146SP16 |
|     |                |       |                      |                                                                                                                                        | A0A146VYC6 |
| 325 | XM_015003153.1 | L     | <b>S2711_3408</b>    | Poecilia mexicana transmembrane protein 26 (tmem26), mRNA                                                                              | Q6ZUK4     |
|     |                |       |                      |                                                                                                                                        | H7BXI3     |
| 326 | XM_008430474.2 | L     | <b>S7384_156</b>     | Poecilia reticulata 1-phosphatidylinositol 4,5-bisphosphate phosphodiesterase delta-4-like (LOC103477381), transcript variant X2, mRNA | Q9BRC7     |
|     |                |       |                      |                                                                                                                                        | H7C237     |
|     |                |       |                      |                                                                                                                                        | H7C281     |
|     |                |       |                      |                                                                                                                                        | C9JAE4     |
|     |                |       |                      |                                                                                                                                        | F2Z3H8     |
| 327 | XM_008430459.2 | B + H | <b>S368_129091</b>   | Poecilia reticulata 2-aminoethanethiol dioxygenase-like (LOC103477378), transcript variant X3, mRNA                                    | Q7KYR7     |

|     |                                                    |       |                      |                                                                                                                                                                                                                                                                                                                                           |                                                                                  |
|-----|----------------------------------------------------|-------|----------------------|-------------------------------------------------------------------------------------------------------------------------------------------------------------------------------------------------------------------------------------------------------------------------------------------------------------------------------------------|----------------------------------------------------------------------------------|
| 328 | XM_017301730.1                                     | L     | <b>S183_454422</b>   | Poecilia reticulata ATPase family, AAA domain containing 1 (atad1), transcript variant X2, mRNA                                                                                                                                                                                                                                           | Q8NBU5                                                                           |
| 329 | XM_008403559.2                                     | L     | <b>S1062_14945</b>   | Poecilia reticulata butyrophilin subfamily 1 member A1-like (LOC103461240), mRNA                                                                                                                                                                                                                                                          | H7BYC3<br>H7C542<br>C9JNC3                                                       |
| 330 | XM_008431539.2<br>XM_008431538.2<br>XM_008431540.2 | L     | <b>S9941_4782742</b> | Poecilia reticulata glutamate receptor ionotropic, NMDA 2D-like (LOC103478060), transcript variant X1, mRNA<br>Poecilia reticulata glutamate receptor ionotropic, NMDA 2D-like (LOC103478060), transcript variant X2, mRNA<br>Poecilia reticulata glutamate receptor ionotropic, NMDA 2D-like (LOC103478060), transcript variant X3, mRNA | O15399                                                                           |
| 331 | XM_017306302.1                                     | L     | <b>S9941_4782742</b> | Poecilia reticulata lysine-specific demethylase 4C-like (LOC103468987), transcript variant X6, mRNA                                                                                                                                                                                                                                       | Q9H3R0<br>F8WCN1<br>C9J879<br>A0A0A0MSR6                                         |
| 332 | XM_017301729.1                                     | B     | <b>S9856_2465434</b> | Poecilia reticulata myeloid-associated differentiation marker-like protein 2 (LOC103481154), mRNA                                                                                                                                                                                                                                         | A6NDP7                                                                           |
| 333 | XM_008424642.2                                     | L     | <b>S2711_3408</b>    | Poecilia reticulata niban-like protein 1 (LOC103473959), mRNA                                                                                                                                                                                                                                                                             | Q96TA1                                                                           |
| 334 | XM_008407919.2                                     | B     | <b>S9949_1018299</b> | Poecilia reticulata retinal homeobox protein Rx1 (LOC103464089), mRNA                                                                                                                                                                                                                                                                     |                                                                                  |
| 335 | XM_008417702.1<br>XM_008417703.1<br>XM_008417704.1 | L     | <b>S1_2497187</b>    | Poecilia reticulata sushi domain containing 1 (susd1), transcript variant X1, mRNA<br>Poecilia reticulata sushi domain containing 1 (susd1), transcript variant X2, mRNA<br>Poecilia reticulata sushi domain containing 1 (susd1), transcript variant X3, mRNA                                                                            | F8WAQ1<br>H3BLV4<br>H0Y6B2<br>H0YCH6                                             |
| 336 | XM_008417479.2<br>XM_008417480.2                   | L + B | <b>S9899_1841030</b> | Poecilia reticulata syntaxin-2 (LOC103469661), transcript variant X1, mRNA<br>Poecilia reticulata syntaxin-2 (LOC103469661), transcript variant X2, mRNA                                                                                                                                                                                  | P43155<br>A0A147AU48                                                             |
| 337 | XM_008414034.2<br>XM_008414035.2                   | L + H | <b>S42_249281</b>    | Poecilia reticulata thyrotropin releasing hormone (trh), transcript variant X1, mRNA<br>Poecilia reticulata thyrotropin releasing hormone (trh), transcript variant X2, mRNA                                                                                                                                                              | A0A147B357<br>A0A146ZXW2<br>A0A146YGA5<br>A0A147AVL5<br>A0A146SP16<br>A0A146VYC6 |
| 338 | XM_008429164.2                                     | L     | <b>S2711_3371</b>    | Poecilia reticulata transmembrane protein 26 (tmem26), mRNA                                                                                                                                                                                                                                                                               | Q6ZUK4<br>H7BXI3                                                                 |

|     |                |   |                      |                                                                                                                        |                                      |
|-----|----------------|---|----------------------|------------------------------------------------------------------------------------------------------------------------|--------------------------------------|
| 339 | XM_017301715.1 | L | <b>S9941_4782742</b> | Poecilia reticulata urotensin-2 receptor-like (LOC103482075), mRNA                                                     | Q9UKP6                               |
| 340 | XM_008416763.2 | L | <b>S174_3611515</b>  | Poecilia reticulata voltage-dependent calcium channel gamma-5 subunit-like (LOC103469220), transcript variant X1, mRNA | Q9UF02                               |
|     | XM_017306034.1 |   |                      | Poecilia reticulata voltage-dependent calcium channel gamma-5 subunit-like (LOC103469220), transcript variant X2, mRNA |                                      |
|     | XM_008416764.2 |   |                      | Poecilia reticulata voltage-dependent calcium channel gamma-5 subunit-like (LOC103469220), transcript variant X3, mRNA |                                      |
|     | XM_017306035.1 |   |                      | Poecilia reticulata voltage-dependent calcium channel gamma-5 subunit-like (LOC103469220), transcript variant X4, mRNA |                                      |
|     | XM_017306036.1 |   |                      | Poecilia reticulata voltage-dependent calcium channel gamma-5 subunit-like (LOC103469220), transcript variant X5, mRNA |                                      |
| 342 | XM_017306950.1 | L | <b>S703_83370</b>    | Poecilia reticulata WAS/WASL-interacting protein family member 3-like (LOC108166601), transcript variant X2, mRNA      | A6NGB9                               |
|     | XM_017306951.1 |   |                      | Poecilia reticulata WAS/WASL-interacting protein family member 3-like (LOC108166601), transcript variant X3, mRNA      | A0A0A0MSG0                           |
|     | XM_017306952.1 |   |                      | Poecilia reticulata WAS/WASL-interacting protein family member 3-like (LOC108166601), transcript variant X4, mRNA      |                                      |
| 343 | NM_001133889.1 | L | <b>S9929_1038014</b> | Pongo abelii KH RNA binding domain containing, signal transduction associated 3 (KHDRBS3), mRNA                        |                                      |
| 344 | NM_001134211.1 | B | <b>S3317_962</b>     | Pongo abelii THAP domain containing 10 (THAP10), mRNA                                                                  | Q9P2Z0<br>H0YN95                     |
| 345 | AF217957.1     | B | <b>S3317_962</b>     | Populus tremuloides cinnamyl alcohol dehydrogenase mRNA, complete cds                                                  |                                      |
| 346 | XM_021963250.1 | L | <b>S9866_174755</b>  | Prunus avium probable serine/threonine-protein kinase PIX7 (LOC110760898), mRNA                                        | E9PIX7                               |
| 347 | XM_020436610.1 | B | <b>S771_52821</b>    | Pseudomyrmex gracilis kinesin heavy chain (LOC109858903), mRNA                                                         | Q12840<br>P33176<br>O60282           |
| 348 | XM_017703180.1 | L | <b>S9906_191627</b>  | Pygocentrus nattereri actin related protein 2/3 complex subunit 1A (arpc1a), mRNA                                      | Q92747<br>E9PF58<br>Q75MY0           |
| 349 | BC099116.1     | L | <b>S9929_1038014</b> | Rattus norvegicus M-phase phosphoprotein 8, mRNA (cDNA clone MGC:116256 IMAGE:7462184), complete cds                   | Q99549                               |
| 350 | NM_001024890.1 | B | <b>S3317_962</b>     | Rattus norvegicus PIH1 domain containing 3 (Pih1d3), mRNA                                                              | Q9NQM4                               |
| 351 | NM_001014173.1 | L | <b>S9929_1038014</b> | Rattus norvegicus ribulose-5-phosphate-3-epimerase (Rpe), mRNA                                                         | Q96AT9                               |
| 352 | NM_001033903.1 | L | <b>S885_89904</b>    | Rattus norvegicus ribosomal RNA adenine dimethylase domain containing 1 (Rmad1), mRNA                                  | Q96FB5<br>H0YBL9<br>E5RHI7<br>E5RI42 |

|     |                |       |                      |                                                                                                                                                                                                                                                                                                                                                                                                                                                                                                            |            |
|-----|----------------|-------|----------------------|------------------------------------------------------------------------------------------------------------------------------------------------------------------------------------------------------------------------------------------------------------------------------------------------------------------------------------------------------------------------------------------------------------------------------------------------------------------------------------------------------------|------------|
|     |                |       |                      |                                                                                                                                                                                                                                                                                                                                                                                                                                                                                                            | E5RJL6     |
|     |                |       |                      |                                                                                                                                                                                                                                                                                                                                                                                                                                                                                                            | E5RIL6     |
| 353 | XM_017856932.1 | L     | <b>S9866_174755</b>  | Rhinopithecus bieti protein tyrosine phosphatase, receptor type Z1 (PTPRZ1), mRNA                                                                                                                                                                                                                                                                                                                                                                                                                          | P23471     |
| 354 | XM_010367171.1 | L     | <b>S178_234532</b>   | Rhinopithecus roxellana KH-type splicing regulatory protein (KHSRP), transcript variant X1, mRNA                                                                                                                                                                                                                                                                                                                                                                                                           | A0A087WTP3 |
|     | XM_010367172.1 |       |                      | Rhinopithecus roxellana KH-type splicing regulatory protein (KHSRP), transcript variant X2, mRNA                                                                                                                                                                                                                                                                                                                                                                                                           | M0R3J3     |
|     | XM_010367174.1 |       |                      | Rhinopithecus roxellana KH-type splicing regulatory protein (KHSRP), transcript variant X3, mRNA                                                                                                                                                                                                                                                                                                                                                                                                           | Q92945     |
| 355 | NM_001168153.1 | L     | <b>S1100_29850</b>   | Saccoglossus kowalevskii p75 neurotrophin receptor-like protein (LOC100313698), mRNA                                                                                                                                                                                                                                                                                                                                                                                                                       | P08138     |
|     |                |       |                      |                                                                                                                                                                                                                                                                                                                                                                                                                                                                                                            | Q00994     |
|     |                |       |                      |                                                                                                                                                                                                                                                                                                                                                                                                                                                                                                            | Q9Y5V3     |
|     |                |       |                      |                                                                                                                                                                                                                                                                                                                                                                                                                                                                                                            | P04629     |
|     |                |       |                      |                                                                                                                                                                                                                                                                                                                                                                                                                                                                                                            | Q9Y4K3     |
|     |                |       |                      |                                                                                                                                                                                                                                                                                                                                                                                                                                                                                                            | P01138     |
|     |                |       |                      |                                                                                                                                                                                                                                                                                                                                                                                                                                                                                                            | O00327     |
|     |                |       |                      |                                                                                                                                                                                                                                                                                                                                                                                                                                                                                                            | Q99523     |
| 356 | XM_010349198.1 | H     | <b>S217_136844</b>   | Saimiri boliviensis boliviensis aspartate beta-hydroxylase domain containing 2 (ASPHD2), mRNA                                                                                                                                                                                                                                                                                                                                                                                                              | A0A024R1D0 |
|     |                |       |                      |                                                                                                                                                                                                                                                                                                                                                                                                                                                                                                            | Q6ICH7     |
| 357 | XM_003941777.2 | B     | <b>S3317_962</b>     | Saimiri boliviensis boliviensis ELAV like neuron-specific RNA binding protein 3 (ELAVL3), transcript variant X1, mRNA                                                                                                                                                                                                                                                                                                                                                                                      | Q14576     |
|     | XM_003941776.2 |       |                      | Saimiri boliviensis boliviensis ELAV like neuron-specific RNA binding protein 3 (ELAVL3), transcript variant X2, mRNA                                                                                                                                                                                                                                                                                                                                                                                      | Q96J71     |
|     |                |       |                      |                                                                                                                                                                                                                                                                                                                                                                                                                                                                                                            | K7EPB5     |
|     |                |       |                      |                                                                                                                                                                                                                                                                                                                                                                                                                                                                                                            | Q9H024     |
|     |                |       |                      |                                                                                                                                                                                                                                                                                                                                                                                                                                                                                                            | L8E8Z0     |
| 358 | XR_743666.1    | B     | <b>S3317_962</b>     | Saimiri boliviensis boliviensis proline-rich receptor-like protein kinase PERK2 (LOC104649891), misc RNA                                                                                                                                                                                                                                                                                                                                                                                                   | P55085     |
| 359 | XM_014160280.1 | L + B | <b>S9899_1841030</b> | Salmo salar syntaxin 2 (stx2), mRNA                                                                                                                                                                                                                                                                                                                                                                                                                                                                        | P43155     |
|     |                |       |                      |                                                                                                                                                                                                                                                                                                                                                                                                                                                                                                            | A0A147AU48 |
| 360 | EU025709.1     | L     | <b>S10156_378391</b> | Salmo salar chromatin modifying protein 2a (Chmp2a), male-specific lethal-1-like protein (Hampin), gastric inhibitory polypeptide (Gip), EAP30 subunit of ELL complex b (Eap30b), and nuclear domain 10 protein 52b (Ndp52b) genes, complete cds; BAC05032 (BAC05032) pseudogene, partial sequence; HoxB8bb (HoxB8bb) pseudogene, complete sequence; homeobox protein HoxB6bb (HoxB6bb) and homeobox protein HoxB5bb (HoxB5bb) genes, complete cds; and HoxB3bb and HoxB1bb pseudogenes, complete sequence | O43633     |

|     |                |       |                      |                                                                                                                                 |            |
|-----|----------------|-------|----------------------|---------------------------------------------------------------------------------------------------------------------------------|------------|
|     |                |       |                      |                                                                                                                                 | A0A024R4S0 |
|     |                |       |                      |                                                                                                                                 | M0R1L7     |
|     |                |       |                      |                                                                                                                                 | M0QXX8     |
|     |                |       |                      |                                                                                                                                 | M0R1T5     |
| 361 | NM_001173625.1 | B     | <b>S8943_473</b>     | <i>Salmo salar</i> procollagen-proline, 2-oxoglutarate 4-dioxygenase (proline 4-hydroxylase), alpha polypeptide I (p4ha1), mRNA | P13674     |
|     |                |       |                      |                                                                                                                                 | Q9UKV8     |
|     |                |       |                      |                                                                                                                                 | P02671     |
|     |                |       |                      |                                                                                                                                 | P42858     |
|     |                |       |                      |                                                                                                                                 | Q5VSQ6     |
| 362 | XM_003769128.2 | L     | <b>S885_89904</b>    | <i>Sarcophilus harrisii</i> 24-hydroxycholesterol 7-alpha-hydroxylase (LOC100919523), mRNA                                      | Q9NYL5     |
|     |                |       |                      |                                                                                                                                 | A0A087WTD2 |
| 363 | XM_022756632.1 | L + B | <b>S9899_1841030</b> | <i>Seriola dumerili</i> syntaxin-2-like (LOC111230065), transcript variant X1, mRNA                                             | P43155     |
|     | XM_022756640.1 |       |                      | <i>Seriola dumerili</i> syntaxin-2-like (LOC111230065), transcript variant X2, mRNA                                             | A0A147AU48 |
|     | XM_022756649.1 |       |                      | <i>Seriola dumerili</i> syntaxin-2-like (LOC111230065), transcript variant X3, mRNA                                             |            |
| 364 | XM_023393890.1 | L + B | <b>S9899_1841030</b> | <i>Seriola lalandi dorsalis</i> syntaxin 2 (stx2), transcript variant X1, mRNA                                                  | P43155     |
|     | XM_023393891.1 |       |                      | <i>Seriola lalandi dorsalis</i> syntaxin 2 (stx2), transcript variant X2, mRNA                                                  | A0A147AU48 |
| 365 | XM_016263825.1 | L     | <b>S178_234532</b>   | <i>Sinocyclocheilus grahami</i> 5-methylcytosine rRNA methyltransferase NSUN4-like (LOC107577791), mRNA                         | Q96CB9     |
|     |                |       |                      |                                                                                                                                 | M0R1K5     |
|     |                |       |                      |                                                                                                                                 | Q6ZRQ1     |
|     |                |       |                      |                                                                                                                                 | A0A087X0V6 |
|     |                |       |                      |                                                                                                                                 | A0A087WT36 |
|     |                |       |                      |                                                                                                                                 | A0A087WUV3 |
| 366 | XM_016288381.1 | H     | <b>S9874_1914529</b> | <i>Sinocyclocheilus grahami</i> immunoglobulin superfamily member 3-like (LOC107597363), transcript variant X3, mRNA            | O75054     |
| 367 | XM_016259949.1 | H     | <b>S1043_75350</b>   | <i>Sinocyclocheilus grahami</i> putative nuclease HARBI1 (LOC107573514), mRNA                                                   | E9PK24     |
|     |                |       |                      |                                                                                                                                 | E9PQI1     |
| 368 | XM_008276734.1 | L + B | <b>S9899_1841030</b> | <i>Stegastes partitus</i> syntaxin 2 (stx2), mRNA                                                                               | P43155     |
|     |                |       |                      |                                                                                                                                 | A0A147AU48 |
| 369 | XM_008304105.1 | B     | <b>S8943_473</b>     | <i>Stegastes partitus</i> transforming protein RhoA-like (LOC103374076), mRNA                                                   | P61586     |

|     |                                                    |       |                      |                                                                                                                                                                                                                                                                   |                                                                      |
|-----|----------------------------------------------------|-------|----------------------|-------------------------------------------------------------------------------------------------------------------------------------------------------------------------------------------------------------------------------------------------------------------|----------------------------------------------------------------------|
| 370 | XM_009688078.1<br>XM_009688085.1                   | L     | <b>S9853_2824879</b> | Struthio camelus australis ubiquitin specific peptidase 9, X-linked (USP9X), transcript variant X1, mRNA<br>Struthio camelus australis ubiquitin specific peptidase 9, X-linked (USP9X), transcript variant X2, mRNA                                              | Q93008<br>D3DWB6<br>Q6P468<br>Q59EZ5<br>Q86X58                       |
| 371 | AJ459419.1                                         | L     | <b>S124_317291</b>   | Takifugu rubripes cacng5 gene, prkca gene and putative LINE-like retrotransposon, cosmids C012B17 and C123B01                                                                                                                                                     | P17252                                                               |
| 372 | XM_009984321.1                                     | B     | <b>S771_52821</b>    | Tauraco erythrolophus Wiskott-Aldrich syndrome-like (WASL), transcript variant X2, mRNA                                                                                                                                                                           | O00401                                                               |
| 373 | JX459927.1                                         | L     | <b>S9929_1038014</b> | Thunnus thynnus kisspeptin 2 (Kiss2) mRNA, complete cds                                                                                                                                                                                                           | Q15726<br>A0A0D9SES6                                                 |
| 374 | XM_026391212.1                                     | L     | <b>S9853_2824879</b> | Urocitellus parryii zinc finger protein 536 (Znf536), mRNA                                                                                                                                                                                                        | O15090<br>K7EKT4<br>A7E228<br>K7EQN6<br>K7EJP8                       |
| 375 | XM_025983505.1<br>XM_025983506.1<br>XM_025983507.1 | B     | <b>S3317_962</b>     | Vulpes vulpes ELAV like RNA binding protein 3 (ELAVL3), transcript variant X1, mRNA<br>Vulpes vulpes ELAV like RNA binding protein 3 (ELAVL3), transcript variant X2, mRNA<br>Vulpes vulpes ELAV like RNA binding protein 3 (ELAVL3), transcript variant X3, mRNA | Q14576<br>Q96J71<br>K7EPB5<br>Q9H024<br>L8E8Z0                       |
| 376 | XM_018235011.1                                     | L     | <b>S9929_1038014</b> | Xenopus laevis zinc finger CCCH-type with G patch domain-containing protein (LOC108700950), mRNA                                                                                                                                                                  | Q8N5A5<br>X6RGY1                                                     |
| 377 | XM_023328054.1                                     | B + H | <b>S368_129091</b>   | Xiphophorus maculatus 2-aminoethanethiol dioxygenase-like (LOC102220352), mRNA                                                                                                                                                                                    | Q96SZ5                                                               |
| 378 | XM_023337701.1<br>XM_023337702.1                   | L     | <b>S703_83370</b>    | Xiphophorus maculatus AP2-associated protein kinase 1-like (LOC102221429), transcript variant X1, mRNA<br>Xiphophorus maculatus AP2-associated protein kinase 1-like (LOC102221429), transcript variant X2, mRNA                                                  | Q2M2I8<br>E9PG46<br>D6W5G0<br>A0A096LNZ0<br>A0A096LP25<br>A0A096LP60 |

|     |                                                                      |   |                      |                                                                                                                                                                                                                                                                                                                                                                                          |                                                                                                                                                  |
|-----|----------------------------------------------------------------------|---|----------------------|------------------------------------------------------------------------------------------------------------------------------------------------------------------------------------------------------------------------------------------------------------------------------------------------------------------------------------------------------------------------------------------|--------------------------------------------------------------------------------------------------------------------------------------------------|
| 379 | XM_023343922.1<br>XM_023343922.1                                     | H | <b>S9873_366940</b>  | Xiphophorus maculatus checkpoint with forkhead and ring finger domains (chfr), transcript variant X2, mRNA<br>Xiphophorus maculatus checkpoint with forkhead and ring finger domains (chfr), transcript variant X2, mRNA                                                                                                                                                                 | Q96EP1<br>F5GWH4<br>A0A096P6K8<br>F5H829<br>F5H375<br>A0A087X0W6<br>A0A087WUN4<br>F5H5P5<br>U3KPU9                                               |
| 380 | XM_023332533.1<br>XM_023332534.1<br>XM_023332535.1<br>XM_023332537.1 | L | <b>S9941_4782742</b> | Xiphophorus maculatus CUB and Sushi multiple domains 1 (csmd1), transcript variant X1, mRNA<br>Xiphophorus maculatus CUB and Sushi multiple domains 1 (csmd1), transcript variant X2, mRNA<br>Xiphophorus maculatus CUB and Sushi multiple domains 1 (csmd1), transcript variant X3, mRNA<br>Xiphophorus maculatus CUB and Sushi multiple domains 1 (csmd1), transcript variant X4, mRNA | Q96PZ7<br>E5RIG2<br>F8W9C3<br>F5GZ18<br>H7BXU2                                                                                                   |
| 381 | XM_005809517.3<br>XM_023332812.1<br>XM_023332813.1                   | L | <b>S2711_3408</b>    | Xiphophorus maculatus cysteinyl-tRNA synthetase (cars), transcript variant X1, mRNA<br>Xiphophorus maculatus cysteinyl-tRNA synthetase (cars), transcript variant X2, mRNA<br>Xiphophorus maculatus cysteinyl-tRNA synthetase (cars), transcript variant X3, mRNA                                                                                                                        | P49589<br>B4DKY1<br>A0A024RCG3<br>B4DPV7<br>A8MVQ3<br>A0A087WWV1<br>A8K067<br>F5H579<br>H0YFF0<br>H0YFV1<br>F5H623<br>E9PRS8<br>H0YGF2<br>E9PLP0 |

|     |                |   |                      |                                                                                                                                                    |            |
|-----|----------------|---|----------------------|----------------------------------------------------------------------------------------------------------------------------------------------------|------------|
|     |                |   |                      |                                                                                                                                                    | C9JLN0     |
| 382 | XM_023340137.1 | L | <b>S9941_4782742</b> | Xiphophorus maculatus diencephalon/mesencephalon homeobox protein 1-B-like (LOC102237364), transcript variant X1, mRNA                             | Q8NFW5     |
|     | XM_005803931.2 |   |                      | Xiphophorus maculatus diencephalon/mesencephalon homeobox protein 1-B-like (LOC102237364), transcript variant X2, mRNA                             |            |
| 383 | XM_023332697.1 | L | <b>S2711_3408</b>    | Xiphophorus maculatus immunoglobulin superfamily DCC subclass member 4 (LOC102231531), transcript variant X1, mRNA                                 | Q8TDY8     |
|     | XM_023332698.1 |   |                      | Xiphophorus maculatus immunoglobulin superfamily DCC subclass member 4 (LOC102231531), transcript variant X2, mRNA                                 |            |
| 384 | XM_023342989.1 | L | <b>S2711_3408</b>    | Xiphophorus maculatus inositol hexakisphosphate and diphosphoinositol-pentakisphosphate kinase 2-like (LOC102227875), transcript variant X13, mRNA | O43314     |
|     |                |   |                      |                                                                                                                                                    | A0A087WZV0 |
|     |                |   |                      |                                                                                                                                                    | D6RBU4     |
|     |                |   |                      |                                                                                                                                                    | H0Y9S9     |
| 385 | XM_023334057.1 | L | <b>S2711_3408</b>    | Xiphophorus maculatus interleukin 1 receptor associated kinase 1 (irak1), transcript variant X1, mRNA                                              | P51617     |
|     | XM_023334063.1 |   |                      | Xiphophorus maculatus interleukin 1 receptor associated kinase 1 (irak1), transcript variant X2, mRNA                                              |            |
|     | XM_023334065.1 |   |                      | Xiphophorus maculatus interleukin 1 receptor associated kinase 1 (irak1), transcript variant X3, mRNA                                              |            |
| 386 | XM_023333689.1 | L | <b>S9941_4782742</b> | Xiphophorus maculatus lysine-specific demethylase 4C-like (LOC102223593), transcript variant X4, mRNA                                              | Q9H3R0     |
|     |                |   |                      |                                                                                                                                                    | F8WCN1     |
|     |                |   |                      |                                                                                                                                                    | C9J879     |
|     |                |   |                      |                                                                                                                                                    | A0A0A0MSR6 |
| 387 | XM_023328262.1 | L | <b>S703_83370</b>    | Xiphophorus maculatus myotilin (myot), transcript variant X5, mRNA                                                                                 | Q9UBF9     |
|     |                |   |                      |                                                                                                                                                    | A0A0S2Z4Y0 |
|     |                |   |                      |                                                                                                                                                    | A0A0C4DFM5 |
|     |                |   |                      |                                                                                                                                                    | B4DT68     |
|     |                |   |                      |                                                                                                                                                    | A0A0S2Z522 |
| 388 | XM_023338326.1 | B | <b>S53_432183</b>    | Xiphophorus maculatus NACHT, LRR and PYD domains-containing protein 12-like (LOC102228242), transcript variant X1, mRNA                            | P59046     |
|     | XM_023338327.1 |   |                      | Xiphophorus maculatus NACHT, LRR and PYD domains-containing protein 12-like (LOC102228242), transcript variant X2, mRNA                            | A0A0C4DFY3 |
|     | XM_014474269.2 |   |                      | Xiphophorus maculatus NACHT, LRR and PYD domains-containing protein 12-like (LOC102228242), transcript variant X3, mRNA                            | A0A0C4DH17 |
| 389 | XM_023325262.1 | L | <b>S2711_3408</b>    | Xiphophorus maculatus PDX1 C-terminal inhibiting factor 1 (pcif1), transcript variant X1, mRNA                                                     | Q9H4Z3     |
|     | XM_005812943.3 |   |                      | Xiphophorus maculatus PDX1 C-terminal inhibiting factor 1 (pcif1), transcript variant X2, mRNA                                                     | A0A087WWZ2 |



|     |                |   |                     |                                                                                                        |                                                              |
|-----|----------------|---|---------------------|--------------------------------------------------------------------------------------------------------|--------------------------------------------------------------|
|     | XM_023325263.1 |   |                     | Xiphophorus maculatus PDX1 C-terminal inhibiting factor 1 (pcif1), transcript variant X3, mRNA         |                                                              |
|     | XM_023325264.1 |   |                     | Xiphophorus maculatus PDX1 C-terminal inhibiting factor 1 (pcif1), transcript variant X4, mRNA         |                                                              |
|     | XM_023325265.1 |   |                     | Xiphophorus maculatus PDX1 C-terminal inhibiting factor 1 (pcif1), transcript variant X5, mRNA         |                                                              |
|     | XM_023325266.1 |   |                     | Xiphophorus maculatus PDX1 C-terminal inhibiting factor 1 (pcif1), transcript variant X6, mRNA         |                                                              |
| 390 | XM_005804340.3 | L | <b>S703_83370</b>   | Xiphophorus maculatus phosphatidylinositol transfer protein beta (pitpnb), transcript variant X2, mRNA | P48739<br>A0A0A0MSW4<br>B2R7P6<br>B3KYB6<br>B3KYB7           |
| 391 | XM_023343353.1 | H | <b>S9873_366940</b> | Xiphophorus maculatus pulmonary surfactant-associated protein D-like (LOC111610285), mRNA              | P35247<br>Q5T0M2<br>G5CCM8                                   |
| 392 | XM_023347384.1 | L | <b>S703_83370</b>   | Xiphophorus maculatus putative deoxyribonuclease tatdn3 (LOC102218828), transcript variant X1, mRNA    | Q17R31                                                       |
|     | XM_023347385.1 |   |                     | Xiphophorus maculatus putative deoxyribonuclease tatdn3 (LOC102218828), transcript variant X2, mRNA    | E9PP81                                                       |
|     | XM_023347386.1 |   |                     | Xiphophorus maculatus putative deoxyribonuclease tatdn3 (LOC102218828), transcript variant X3, mRNA    | E9PRA1                                                       |
|     | XM_023347387.1 |   |                     | Xiphophorus maculatus putative deoxyribonuclease tatdn3 (LOC102218828), transcript variant X4, mRNA    | E9PQP8                                                       |
|     | XM_023347389.1 |   |                     | Xiphophorus maculatus putative deoxyribonuclease tatdn3 (LOC102218828), transcript variant X6, mRNA    | H0YCC7<br>H0YD82<br>E9PPF0<br>A0A1S7LLX1<br>U3KQ29<br>H0YCN0 |
| 393 | XM_023330764.1 | L | <b>S703_83370</b>   | Xiphophorus maculatus RNA binding motif protein 12B (rbm12b), transcript variant X2, mRNA              | Q8IXT5<br>B9ZVT1<br>E5RJV8<br>E5RHG1<br>E5RJW8               |

|     |                                                                      |       |                      |                                                                                                                                                                                                                                                                                                                                   | E5RJ83                                                                         |
|-----|----------------------------------------------------------------------|-------|----------------------|-----------------------------------------------------------------------------------------------------------------------------------------------------------------------------------------------------------------------------------------------------------------------------------------------------------------------------------|--------------------------------------------------------------------------------|
| 394 | XM_023350157.1                                                       | L     | <b>S174_3611515</b>  | Xiphophorus maculatus round spermatid basic protein 1-like (LOC102219208), mRNA                                                                                                                                                                                                                                                   | Q5VWQ0<br>Q6PCB5<br>C9JM20<br>H7C2D3<br>A0A0C4DH79                             |
| 395 | XM_023351494.1<br>XM_023351495.1<br>XR_002754356.1                   | B + H | <b>S368_129091</b>   | Xiphophorus maculatus serine/threonine-protein kinase PAK 4 (LOC102225392), transcript variant X1, mRNA<br>Xiphophorus maculatus serine/threonine-protein kinase PAK 4 (LOC102225392), transcript variant X2, mRNA<br>Xiphophorus maculatus serine/threonine-protein kinase PAK 4 (LOC102225392), transcript variant X3, misc_RNA | A0A024R0J1<br>A0A024R0L8<br>M0R1R1<br>M0R0L9<br>M0R2X4<br>M0R3G6<br>B4DUG0     |
| 396 | XM_023350876.1<br>XM_023350877.1                                     | L     | <b>S703_83370</b>    | Xiphophorus maculatus solute carrier family 33 member 1 (slc33a1), transcript variant X1, mRNA<br>Xiphophorus maculatus solute carrier family 33 member 1 (slc33a1), transcript variant X2, mRNA                                                                                                                                  | O00400<br>H7C577<br>H7C562<br>H7C532<br>A0A2R8YF57<br>A0A2R8Y359<br>A0A2R8Y5I5 |
| 397 | XM_023343215.1<br>XM_005806921.2<br>XM_023343217.1<br>XM_023343218.1 | L + B | <b>S9899_1841030</b> | Xiphophorus maculatus syntaxin-2 (LOC102236004), transcript variant X1, mRNA<br>Xiphophorus maculatus syntaxin-2 (LOC102236004), transcript variant X2, mRNA<br>Xiphophorus maculatus syntaxin-2 (LOC102236004), transcript variant X3, mRNA<br>Xiphophorus maculatus syntaxin-2 (LOC102236004), transcript variant X4, mRNA      | P43155<br>A0A147AU48                                                           |
| 398 | XM_005805658.2<br>XM_005805659.2                                     | L + H | <b>S42_249281</b>    | Xiphophorus maculatus thyrotropin releasing hormone (trh), transcript variant X1, mRNA<br>Xiphophorus maculatus thyrotropin releasing hormone (trh), transcript variant X2, mRNA                                                                                                                                                  | A0A147B357<br>A0A146ZXW2<br>A0A146YGA5<br>A0A147AVL5                           |

|     |                |   |                      |                                                                                                                          | A0A146SP16 |
|-----|----------------|---|----------------------|--------------------------------------------------------------------------------------------------------------------------|------------|
|     |                |   |                      |                                                                                                                          | A0A146VYC6 |
| 399 | XM_023348925.1 | L | <b>S2711_3408</b>    | Xiphophorus maculatus trinucleotide repeat containing 18 (tnrc18), transcript variant X1, mRNA                           | O15417     |
|     | XM_014471422.2 |   |                      | Xiphophorus maculatus trinucleotide repeat containing 18 (tnrc18), transcript variant X2, mRNA                           | H9KVB4     |
|     | XM_023348927.1 |   |                      | Xiphophorus maculatus trinucleotide repeat containing 18 (tnrc18), transcript variant X3, mRNA                           | H7C0N9     |
|     |                |   |                      |                                                                                                                          | H7BXS9     |
|     |                |   |                      |                                                                                                                          | H7C3U5     |
|     |                |   |                      |                                                                                                                          | A8MTZ4     |
|     |                |   |                      |                                                                                                                          | H7C177     |
|     |                |   |                      |                                                                                                                          | C9J9K1     |
|     |                |   |                      |                                                                                                                          | A3KMH2     |
| 400 | XM_023348487.1 | L | <b>S703_83370</b>    | Xiphophorus maculatus ubiquitin carboxyl-terminal hydrolase 43-like (LOC102235173), transcript variant X1, mRNA          | Q70EL4     |
|     | XM_023348488.1 |   |                      | Xiphophorus maculatus ubiquitin carboxyl-terminal hydrolase 43-like (LOC102235173), transcript variant X2, mRNA          | V9GZ20     |
|     |                |   |                      |                                                                                                                          | V9GXZ5     |
| 401 | XM_023348688.1 | L | <b>S174_3611515</b>  | Xiphophorus maculatus voltage-dependent calcium channel gamma-5 subunit-like (LOC102227037), transcript variant X1, mRNA | Q9UF02     |
|     | XM_005808875.2 |   |                      | Xiphophorus maculatus voltage-dependent calcium channel gamma-5 subunit-like (LOC102227037), transcript variant X2, mRNA |            |
| 402 | XM_023348828.1 | L | <b>S192_63422</b>    | Xiphophorus maculatus zinc finger protein 652 (znf652), transcript variant X1, mRNA                                      | Q9Y2D9     |
|     | XM_023348829.1 |   |                      | Xiphophorus maculatus zinc finger protein 652 (znf652), transcript variant X2, mRNA                                      | D6RF85     |
|     | XM_023348830.1 |   |                      | Xiphophorus maculatus zinc finger protein 652 (znf652), transcript variant X3, mRNA                                      | A8K9F2     |
|     | XM_023348831.1 |   |                      | Xiphophorus maculatus zinc finger protein 652 (znf652), transcript variant X4, mRNA                                      |            |
|     | XM_023348832.1 |   |                      | Xiphophorus maculatus zinc finger protein 652 (znf652), transcript variant X5, mRNA                                      |            |
| 403 | NM_001086195.1 | L | <b>S9929_1038014</b> | Xenopus laevis Actin, alpha cardiac muscle 2-like (MGC53823), mRNA                                                       | P35609     |
| 404 | NM_001094741.1 | B | <b>S8943_473</b>     | Xenopus laevis aquaporin 1 (Colton blood group) S homeolog (aqp1.S), mRNA                                                | P29972     |
| 405 | NM_001092374.1 | H | <b>S9889_2454843</b> | Xenopus laevis ArfGAP with coiled-coil, ankyrin repeat and PH domains 1 S homeolog (acap1.S), mRNA                       | Q15027     |
|     |                |   |                      |                                                                                                                          | I3L0K9     |
|     |                |   |                      |                                                                                                                          | I3L268     |
| 406 | NM_001092784.1 | L | <b>S9929_1038014</b> | Xenopus laevis coiled-coil domain containing 28B L homeolog (ccdc28b.L), mRNA                                            | Q9BUN5     |

|     |                |   |                      |                                                                                             |            |
|-----|----------------|---|----------------------|---------------------------------------------------------------------------------------------|------------|
|     |                |   |                      |                                                                                             | E9PM81     |
|     |                |   |                      |                                                                                             | E9PM03     |
| 407 | NM_001093549.1 | L | <b>S885_89904</b>    | Xenopus laevis cytochrome b-245 alpha polypeptide L homeolog (cyba.L), mRNA                 | P13498     |
|     |                |   |                      |                                                                                             | H3BNP7     |
|     |                |   |                      |                                                                                             | H3BR52     |
|     |                |   |                      |                                                                                             | H3BPX1     |
|     |                |   |                      |                                                                                             | H3BT77     |
| 408 | NM_001095540.1 | L | <b>S9929_1038014</b> | Xenopus laevis forkhead box I2 S homeolog (foxi2.S), mRNA                                   | C4IXT1     |
|     |                |   |                      |                                                                                             | Q6ZQN5     |
| 409 | NM_001096224.1 | L | <b>S9866_809619</b>  | Xenopus laevis sperm-tail PG-rich repeat containing 1 L homeolog (stpg1.L), mRNA            | Q5TH74     |
|     |                |   |                      |                                                                                             | Q5TH77     |
|     |                |   |                      |                                                                                             | H0Y4J3     |
| 410 | NM_001097722.1 | L | <b>S9853_2824879</b> | Xenopus laevis TruB pseudouridine (psi) synthase family member 2 L homeolog (trub2.L), mRNA | O95900     |
|     |                |   |                      |                                                                                             | A0A024R886 |
| 411 | NM_001093137.1 | L | <b>S9966_92994</b>   | Xenopus laevis zinc finger protein 484 L homeolog (znf484.L), mRNA                          | Q5JVG2     |
| 412 | NM_001095068.1 | L | <b>S9929_1038014</b> | Xenopus laevis zinc finger, CCCH-type with G-patch domain L homeolog (zgpat.L), mRNA        | Q8N5A5     |
| 413 | NM_213666.2    | L | <b>S9853_2824879</b> | Xenopus tropicalis 6-phosphofructo-2-kinase/fructose-2,6-biphosphatase 4 (pfkfb4), mRNA     | Q16877     |
|     |                |   |                      |                                                                                             | Q66S35     |
|     |                |   |                      |                                                                                             | C9K0D8     |
|     |                |   |                      |                                                                                             | C9JX77     |
|     |                |   |                      |                                                                                             | C9JJ23     |
|     |                |   |                      |                                                                                             | B2R6L2     |
|     |                |   |                      |                                                                                             | F8WC12     |
|     |                |   |                      |                                                                                             | F8WDY1     |

N = consecutive number of gene listed. They are presented as a cluster when a gene was containing more than one variant.

L = Lositan; B = Bayenv2; H = Hierarchical Island Model

**Table S4.** Enrichment analysis: functional clusters. The table explains the associations between groups of targeted genes (Uniprot accessions) and the functional terms identified in the significant 16 clusters identified by DAVID 6.7 (Huang et al., 2009).

| Annotation Cluster 1 |                                                           | <b>Function: Metal-thiolate cluster (Antioxydant) (ES = 20.55)</b> |            |          |                                                                                                                                                                                    |  |
|----------------------|-----------------------------------------------------------|--------------------------------------------------------------------|------------|----------|------------------------------------------------------------------------------------------------------------------------------------------------------------------------------------|--|
| Category             | Term                                                      | Count                                                              | %          | PValue   | Genes                                                                                                                                                                              |  |
| UP_KEYWORDS          | Metal-thiolate cluster                                    | 14                                                                 | 3.24074074 | 1.07E-21 | A0A024R6R7, A1L3X4, H3BR34, P07438, P04733, H3BQX6, P04732, H3BSS0, P04731, Q93083, P13640, H3BRY8, P25713, P80294, H3BTG5, H3BSP9, P80297, P0DM35, P47944, P02795, Q8N339, U3KQD7 |  |
| INTERPRO             | IPR023587:Metallothionein domain, vertebrate              | 14                                                                 | 3.24074074 | 3.61E-21 | A0A024R6R7, A1L3X4, H3BR34, P07438, P04733, H3BQX6, P04732, H3BSS0, P04731, Q93083, P13640, H3BRY8, P25713, P80294, H3BTG5, H3BSP9, P80297, P0DM35, P47944, P02795, Q8N339, U3KQD7 |  |
| INTERPRO             | IPR017854:Metallothionein domain                          | 14                                                                 | 3.24074074 | 3.61E-21 | A0A024R6R7, A1L3X4, H3BR34, P07438, P04733, H3BQX6, P04732, H3BSS0, P04731, Q93083, P13640, H3BRY8, P25713, P80294, H3BTG5, H3BSP9, P80297, P0DM35, P47944, P02795, Q8N339, U3KQD7 |  |
| INTERPRO             | IPR003019:Metallothionein superfamily, eukaryotic         | 14                                                                 | 3.24074074 | 3.61E-21 | A0A024R6R7, A1L3X4, H3BR34, P07438, P04733, H3BQX6, P04732, H3BSS0, P04731, Q93083, P13640, H3BRY8, P25713, P80294, H3BTG5, H3BSP9, P80297, P0DM35, P47944, P02795, Q8N339, U3KQD7 |  |
| INTERPRO             | IPR000006:Metallothionein, vertebrate                     | 14                                                                 | 3.24074074 | 3.61E-21 | A0A024R6R7, A1L3X4, H3BR34, P07438, P04733, H3BQX6, P04732, H3BSS0, P04731, Q93083, P13640, H3BRY8, P25713, P80294, H3BTG5, H3BSP9, P80297, P0DM35, P47944, P02795, Q8N339, U3KQD7 |  |
| Annotation Cluster 2 |                                                           | <b>Function: Metal Binding proteins (ES = 14.88)</b>               |            |          |                                                                                                                                                                                    |  |
| Category             | Term                                                      | Count                                                              | %          | PValue   | Genes                                                                                                                                                                              |  |
| INTERPRO             | IPR018064:Metallothionein, vertebrate, metal binding site | 11                                                                 | 2.5462963  | 2.81E-16 | A0A024R6R7, H3BR34, P07438, H3BQX6, P04733, H3BSS0, P04732, P04731, Q93083, P13640, P80294, P25713, H3BRY8, H3BTG5, P80297, H3BSP9, P02795, U3KQD7, Q8N339                         |  |
| UP_SEQ_FEATURE       | region of interest:Beta                                   | 11                                                                 | 2.5462963  | 2.85E-15 | A0A024R6R7, H3BR34, P07438, H3BQX6, P04733, H3BSS0, P04732, P04731, Q93083, P13640, P80294, P25713, H3BRY8, H3BTG5, P80297, H3BSP9, P02795, U3KQD7, Q8N339                         |  |
| UP_SEQ_FEATURE       | region of interest:Alpha                                  | 11                                                                 | 2.5462963  | 2.85E-15 | A0A024R6R7, H3BR34, P07438, H3BQX6, P04733, H3BSS0, P04732, P04731, Q93083, P13640, P80294, P25713, H3BRY8, H3BTG5, P80297, H3BSP9, P02795, U3KQD7, Q8N339                         |  |

| <b>Function: Nitrogen metabolism (ES = 12.59)</b> |                  |                                           |       |           |          |                                                                                        |
|---------------------------------------------------|------------------|-------------------------------------------|-------|-----------|----------|----------------------------------------------------------------------------------------|
| Annotation Cluster 3                              | Category         | Term                                      | Count | %         | PValue   | Genes                                                                                  |
|                                                   | GOTERM_MF_DIRECT | GO:0004089~carbonate dehydratase activity | 11    | 2.5462963 | 2.82E-14 | P23280, P00915, Q9ULX7, Q16790, P07451, Q8N1Q1, P35219, P43166, O43570, P00918, P22748 |
|                                                   | INTERPRO         | IPR023561:Carbonic anhydrase, alpha-class | 11    | 2.5462963 | 1.85E-13 | P23280, P00915, Q9ULX7, Q16790, P07451, Q8N1Q1, P35219, P43166, O43570, P00918, P22748 |
|                                                   | KEGG_PATHWAY     | hsa00910:Nitrogen metabolism              | 11    | 2.5462963 | 3.36E-12 | P23280, P00915, Q9ULX7, Q16790, P07451, Q8N1Q1, P35219, P43166, O43570, P00918, P22748 |

| <b>Function: Fatty acid metabolism (ES = 4.48)</b> |          |                                        |       |            |          |                                                        |
|----------------------------------------------------|----------|----------------------------------------|-------|------------|----------|--------------------------------------------------------|
| Annotation Cluster 4                               | Category | Term                                   | Count | %          | PValue   | Genes                                                  |
|                                                    | INTERPRO | IPR000463:Cytosolic fatty-acid binding | 7     | 1.62037037 | 1.16E-06 | Q01469, P51161, P05413, O15540, P15090, P12104, P07148 |
|                                                    | INTERPRO | IPR012674:Calycin                      | 7     | 1.62037037 | 1.50E-04 | Q01469, P51161, P05413, O15540, P15090, P12104, P07148 |
|                                                    | INTERPRO | IPR011038:Calycin-like                 | 7     | 1.62037037 | 2.02E-04 | Q01469, P51161, P05413, O15540, P15090, P12104, P07148 |

| <b>Function: mechanisms of signal transduction via tyrosine kinases (ES = 4.19)</b> |                  |                                                                |       |            |          |                                                    |
|-------------------------------------------------------------------------------------|------------------|----------------------------------------------------------------|-------|------------|----------|----------------------------------------------------|
| Annotation Cluster 5                                                                | Category         | Term                                                           | Count | %          | PValue   | Genes                                              |
|                                                                                     | INTERPRO         | IPR000494:EGF receptor, L domain                               | 5     | 1.15740741 | 7.95E-06 | P04626, P21860, P06213, Q15303, P00533, A0A024RB84 |
|                                                                                     | INTERPRO         | IPR006211:Furin-like cysteine-rich domain                      | 5     | 1.15740741 | 7.95E-06 | P04626, P21860, P06213, Q15303, P00533, A0A024RB84 |
|                                                                                     | GOTERM_MF_DIRECT | GO:0004716~receptor signaling protein tyrosine kinase activity | 5     | 1.15740741 | 4.82E-05 | P04626, P21860, P06213, Q15303, P00533, A0A024RB84 |
|                                                                                     | INTERPRO         | IPR006212:Furin-like repeat                                    | 5     | 1.15740741 | 5.72E-04 | P04626, P21860, P06213, Q15303, P00533, A0A024RB84 |
|                                                                                     | SMART            | SM00261:FU                                                     | 5     | 1.15740741 | 6.55E-04 | P04626, P21860, P06213, Q15303, P00533, A0A024RB84 |

| <b>Function: Tyrosin kinase catalitic asctivity (ES = 2.38)</b> |             |                                                     |       |            |            |                                                                                                                        |
|-----------------------------------------------------------------|-------------|-----------------------------------------------------|-------|------------|------------|------------------------------------------------------------------------------------------------------------------------|
| Annotation Cluster 6                                            | Category    | Term                                                | Count | %          | PValue     | Genes                                                                                                                  |
|                                                                 | INTERPRO    | IPR020635:Tyrosine-protein kinase, catalytic domain | 8     | 1.85185185 | 0.00281881 | P06239, Q5T244, Q5T245, A0A024R906, Q15303, P04626, Q5T241, H0Y570, Q16832, P04629, P21860, P06213, P00533, A0A024RB84 |
|                                                                 | SMART       | SM00219:TyrKc                                       | 8     | 1.85185185 | 0.00340702 | P06239, Q5T244, Q5T245, A0A024R906, Q15303, P04626, Q5T241, H0Y570, Q16832, P04629, P21860, P06213, P00533, A0A024RB84 |
|                                                                 | UP_KEYWORDS | Tyrosine-protein kinase                             | 8     | 1.85185185 | 0.007728   | P06239, Q5T244, Q5T245, A0A024R906, Q15303, P04626, Q5T241, H0Y570, Q16832, P04629, P21860, P06213, P00533, A0A024RB84 |

| Annotation Cluster 7 |                                            | <b>Function: subcellular (cytoskeleton) localization (ES = 1.62)</b> |            |            |                                                                                            |  |
|----------------------|--------------------------------------------|----------------------------------------------------------------------|------------|------------|--------------------------------------------------------------------------------------------|--|
| Category             | Term                                       | Count                                                                | %          | PValue     | Genes                                                                                      |  |
| INTERPRO             | IPR010473:Diaphanous GTPase-binding        | 3                                                                    | 0.69444444 | 0.01596229 | K7EJE6, F8VYL1, Q96PY5, Q8IVF7, K7EMY8, K7ERL1, A0A0A0MR62, F8W1F5, K7EK60, O95466, C9IZY8 |  |
| INTERPRO             | IPR010472:Diaphanous FH3                   | 3                                                                    | 0.69444444 | 0.01596229 | K7EJE6, F8VYL1, Q96PY5, Q8IVF7, K7EMY8, K7ERL1, A0A0A0MR62, F8W1F5, K7EK60, O95466, C9IZY8 |  |
| SMART                | SM01140:SM01140                            | 3                                                                    | 0.69444444 | 0.01714181 | K7EJE6, F8VYL1, Q96PY5, Q8IVF7, K7EMY8, K7ERL1, A0A0A0MR62, F8W1F5, K7EK60, O95466, C9IZY8 |  |
| SMART                | SM01139:SM01139                            | 3                                                                    | 0.69444444 | 0.01714181 | K7EJE6, F8VYL1, Q96PY5, Q8IVF7, K7EMY8, K7ERL1, A0A0A0MR62, F8W1F5, K7EK60, O95466, C9IZY8 |  |
| UP_SEQ_FEATURE       | domain:GBD/FH3                             | 3                                                                    | 0.69444444 | 0.02000358 | K7EJE6, F8VYL1, Q96PY5, Q8IVF7, K7EMY8, K7ERL1, A0A0A0MR62, F8W1F5, K7EK60, O95466, C9IZY8 |  |
| INTERPRO             | IPR014768:GTPase-binding/formin homology 3 | 3                                                                    | 0.69444444 | 0.02368352 | K7EJE6, F8VYL1, Q96PY5, Q8IVF7, K7EMY8, K7ERL1, A0A0A0MR62, F8W1F5, K7EK60, O95466, C9IZY8 |  |
| UP_SEQ_FEATURE       | domain:FH2                                 | 3                                                                    | 0.69444444 | 0.03620894 | K7EJE6, F8VYL1, Q96PY5, Q8IVF7, K7EMY8, K7ERL1, A0A0A0MR62, F8W1F5, K7EK60, O95466, C9IZY8 |  |
| INTERPRO             | IPR015425:Actin-binding FH2                | 3                                                                    | 0.69444444 | 0.04265806 | K7EJE6, F8VYL1, Q96PY5, Q8IVF7, K7EMY8, K7ERL1, A0A0A0MR62, F8W1F5, K7EK60, O95466, C9IZY8 |  |
| SMART                | SM00498:FH2                                | 3                                                                    | 0.69444444 | 0.04566941 | K7EJE6, F8VYL1, Q96PY5, Q8IVF7, K7EMY8, K7ERL1, A0A0A0MR62, F8W1F5, K7EK60, O95466, C9IZY8 |  |

| Annotation Cluster 8 |                                                    | <b>Function: steroid/arachidonic acid metabolism (ES = 1.59)</b> |            |            |                                                                                                                                                    |  |
|----------------------|----------------------------------------------------|------------------------------------------------------------------|------------|------------|----------------------------------------------------------------------------------------------------------------------------------------------------|--|
| Category             | Term                                               | Count                                                            | %          | PValue     | Genes                                                                                                                                              |  |
| GOTERM_MF_DIRECT     | GO:0008392~arachidonic acid epoxygenase activity   | 4                                                                | 0.92592593 | 0.00424133 | Q9UQ59, S5RV29, G3V188, S5RXA4, P33260, P33261, S5RG22, P10632, P11712, S5RV20, Q9UEH3, A0A087X125, Q2XN56, S5R8H1, S5R8G8, E9PLI9, B7Z1F5, E9PIW6 |  |
| GOTERM_BP_DIRECT     | GO:0019373~epoxygenase P450 pathway                | 4                                                                | 0.92592593 | 0.00728785 | Q9UQ59, S5RV29, G3V188, S5RXA4, P33260, P33261, S5RG22, P10632, P11712, S5RV20, Q9UEH3, A0A087X125, Q2XN56, S5R8H1, S5R8G8, E9PLI9, B7Z1F5, E9PIW6 |  |
| GAD_DISEASE          | warfarin sensitivity                               | 4                                                                | 0.92592593 | 0.00969021 | Q9UQ59, S5RV29, G3V188, S5RXA4, P33260, P33261, S5RG22, P10632, P11712, S5RV20, Q9UEH3, A0A087X125, Q2XN56, S5R8H1, S5R8G8, E9PLI9, B7Z1F5, E9PIW6 |  |
| GOTERM_MF_DIRECT     | GO:0008395~steroid hydroxylase activity            | 4                                                                | 0.92592593 | 0.0201886  | Q9UQ59, S5RV29, G3V188, S5RXA4, P33260, P33261, S5RG22, P10632, P11712, S5RV20, Q9UEH3, A0A087X125, Q2XN56, S5R8H1, S5R8G8, E9PLI9, B7Z1F5, E9PIW6 |  |
| GOTERM_MF_DIRECT     | <b>GO:0019825~oxygen binding</b>                   | 4                                                                | 0.92592593 | 0.08944502 | Q9UQ59, S5RV29, G3V188, S5RXA4, P33260, P33261, S5RG22, P10632, P11712, S5RV20, Q9UEH3, A0A087X125, Q2XN56, S5R8H1, S5R8G8, E9PLI9, B7Z1F5, E9PIW6 |  |
| INTERPRO             | <b>IPR002401:Cytochrome P450, E-class, group I</b> | 4                                                                | 0.92592593 | 0.09930195 | Q9UQ59, S5RV29, G3V188, S5RXA4, P33260, P33261, S5RG22, P10632, P11712, S5RV20, Q9UEH3, A0A087X125, Q2XN56, S5R8H1, S5R8G8, E9PLI9, B7Z1F5, E9PIW6 |  |
| INTERPRO             | <b>IPR017972:Cytochrome P450, conserved site</b>   | 4                                                                | 0.92592593 | 0.13791879 | Q9UQ59, S5RV29, G3V188, S5RXA4, P33260, P33261, S5RG22, P10632, P11712, S5RV20, Q9UEH3, A0A087X125, Q2XN56, S5R8H1, S5R8G8, E9PLI9, B7Z1F5, E9PIW6 |  |

| <b>Function: Drugs/xenobiotics metabolism (ES = 1.34)</b> |                  |                                                                                                                                                                                   |       |            |            |                                                                                                                                                                        |
|-----------------------------------------------------------|------------------|-----------------------------------------------------------------------------------------------------------------------------------------------------------------------------------|-------|------------|------------|------------------------------------------------------------------------------------------------------------------------------------------------------------------------|
| Annotation Cluster 9                                      | Category         | Term                                                                                                                                                                              | Count | %          | PValue     | Genes                                                                                                                                                                  |
|                                                           | COG_ONTOLOGY     | Secondary metabolites biosynthesis, transport, and catabolism<br>GO:0016705~oxidoreductase activity, acting on paired donors, with incorporation or reduction of molecular oxygen | 5     | 1.15740741 | 0.02284499 | Q9UQ59, Q9NYL5, S5RV29, G3V188, S5RXA4, P33260, P33261, S5RG22, P10632, P11712, S5RV20, Q9UEH3, A0A087X125, A0A087WTD2, Q2XN56, S5R8H1, S5R8G8, E9PLI9, B7Z1F5, E9PIW6 |
|                                                           | GOTERM_MF_DIRECT |                                                                                                                                                                                   | 5     | 1.15740741 | 0.03956108 | Q9UQ59, Q9NYL5, S5RV29, G3V188, S5RXA4, P33260, P33261, S5RG22, P10632, P11712, S5RV20, Q9UEH3, A0A087X125, A0A087WTD2, Q2XN56, S5R8H1, S5R8G8, E9PLI9, B7Z1F5, E9PIW6 |
|                                                           | GOTERM_MF_DIRECT | GO:0004497~monooxygenase activity                                                                                                                                                 | 5     | 1.15740741 | 0.04176411 | Q9UQ59, Q9NYL5, S5RV29, G3V188, S5RXA4, P33260, P33261, S5RG22, P10632, P11712, S5RV20, Q9UEH3, A0A087X125, A0A087WTD2, Q2XN56, S5R8H1, S5R8G8, E9PLI9, B7Z1F5, E9PIW6 |
|                                                           | INTERPRO         | IPR001128:Cytochrome P450                                                                                                                                                         | 5     | 1.15740741 | 0.04352862 | Q9UQ59, Q9NYL5, S5RV29, G3V188, S5RXA4, P33260, P33261, S5RG22, P10632, P11712, S5RV20, Q9UEH3, A0A087X125, A0A087WTD2, Q2XN56, S5R8H1, S5R8G8, E9PLI9, B7Z1F5, E9PIW6 |
|                                                           | UP_KEYWORDS      | <b>Monooxygenase</b>                                                                                                                                                              | 5     | 1.15740741 | 0.10290758 | Q9UQ59, Q9NYL5, S5RV29, G3V188, S5RXA4, P33260, P33261, S5RG22, P10632, P11712, S5RV20, Q9UEH3, A0A087X125, A0A087WTD2, Q2XN56, S5R8H1, S5R8G8, E9PLI9, B7Z1F5, E9PIW6 |

| <b>Function: DNA expression regulation (ES = 1.29)</b> |                  |                                                     |       |            |            |                                                                                        |
|--------------------------------------------------------|------------------|-----------------------------------------------------|-------|------------|------------|----------------------------------------------------------------------------------------|
| Annotation Cluster 10                                  | Category         | Term                                                | Count | %          | PValue     | Genes                                                                                  |
|                                                        | GOTERM_BP_DIRECT | GO:0043982~histone H4-K8 acetylation                | 3     | 0.69444444 | 0.04972924 | D6RAS5, D6RFK0, D6RCS1, Q6IE81, D6RFZ5, D6RC05, D6RE74, D6RGE7, O95251, D6RBB3, Q9BVI0 |
|                                                        | GOTERM_BP_DIRECT | GO:0043981~histone H4-K5 acetylation                | 3     | 0.69444444 | 0.04972924 | D6RAS5, D6RFK0, D6RCS1, Q6IE81, D6RFZ5, D6RC05, D6RE74, D6RGE7, O95251, D6RBB3, Q9BVI0 |
|                                                        | GOTERM_CC_DIRECT | <b>GO:0000123~histone acetyltransferase complex</b> | 3     | 0.69444444 | 0.08795964 | D6RAS5, D6RFK0, D6RCS1, Q6IE81, D6RFZ5, D6RC05, D6RE74, D6RGE7, O95251, D6RBB3, Q9BVI0 |



| <b>Function: steroid/arachidonic acid metabolism (ES = 1.12)</b> |                  |                                                                |       |            |            |                                                                                                                                                                                                                                            |
|------------------------------------------------------------------|------------------|----------------------------------------------------------------|-------|------------|------------|--------------------------------------------------------------------------------------------------------------------------------------------------------------------------------------------------------------------------------------------|
| Annotation Cluster 11                                            | Category         | Term                                                           | Count | %          | PValue     | Genes                                                                                                                                                                                                                                      |
|                                                                  | GAD_DISEASE      | ulcer, gastric; repaglinide pharmacology; coagulation disorder | 3     | 0.69444444 | 0.00326715 | Q9UQ59, S5RV29, G3V188, S5RXA4, P33261, S5RG22, P10632, P11712, S5RV20, Q9UEH3, A0A087X125, S5R8H1, S5R8G8, E9PLI9, B7Z1F5, E9PIW6                                                                                                         |
|                                                                  | GOTERM_BP_DIRECT | GO:0097267~omega-hydroxylase P450 pathway                      | 3     | 0.69444444 | 0.01655131 | Q9UQ59, S5RV29, G3V188, S5RXA4, P33261, S5RG22, P10632, P11712, S5RV20, Q9UEH3, A0A087X125, S5R8H1, S5R8G8, E9PLI9, B7Z1F5, E9PIW6                                                                                                         |
|                                                                  | GAD_DISEASE      | Epilepsy                                                       | 3     | 0.69444444 | 0.02229885 | Q9UQ59, S5RV29, G3V188, S5RXA4, P33261, S5RG22, P10632, P11712, S5RV20, Q9UEH3, A0A087X125, S5R8H1, S5R8G8, E9PLI9, B7Z1F5, E9PIW6                                                                                                         |
|                                                                  | GOTERM_BP_DIRECT | GO:0042738~exogenous drug catabolic process                    | 3     | 0.69444444 | 0.02901813 | Q9UQ59, S5RV29, G3V188, S5RXA4, P33261, S5RG22, P10632, P11712, S5RV20, Q9UEH3, A0A087X125, S5R8H1, S5R8G8, E9PLI9, B7Z1F5, E9PIW6                                                                                                         |
|                                                                  | GAD_DISEASE      | Myocardial Infarction Stroke                                   | 3     | 0.69444444 | 0.06045948 | Q9UQ59, S5RV29, G3V188, S5RXA4, P33261, S5RG22, P10632, P11712, S5RV20, Q9UEH3, A0A087X125, S5R8H1, S5R8G8, E9PLI9, B7Z1F5, E9PIW6                                                                                                         |
|                                                                  | GAD_DISEASE      | Drug Hypersensitivity                                          | 3     | 0.69444444 | 0.11803582 | Q9UQ59, S5RV29, G3V188, S5RXA4, P33261, S5RG22, P10632, P11712, S5RV20, Q9UEH3, A0A087X125, S5R8H1, S5R8G8, E9PLI9, B7Z1F5, E9PIW6                                                                                                         |
|                                                                  | GOTERM_BP_DIRECT | GO:0017144~drug metabolic process                              | 3     | 0.69444444 | 0.12391974 | Q9UQ59, S5RV29, G3V188, S5RXA4, P33261, S5RG22, P10632, P11712, S5RV20, Q9UEH3, A0A087X125, S5R8H1, S5R8G8, E9PLI9, B7Z1F5, E9PIW6                                                                                                         |
|                                                                  | KEGG_PATHWAY     | hsa00591:Linoleic acid metabolism                              | 3     | 0.69444444 | 0.19034982 | Q9UQ59, S5RV29, G3V188, S5RXA4, P33261, S5RG22, P10632, P11712, S5RV20, Q9UEH3, A0A087X125, S5R8H1, S5R8G8, E9PLI9, B7Z1F5, E9PIW6                                                                                                         |
|                                                                  | GOTERM_BP_DIRECT | GO:0008202~steroid metabolic process                           | 3     | 0.69444444 | 0.25418562 | Q9UQ59, S5RV29, G3V188, S5RXA4, P33261, S5RG22, P10632, P11712, S5RV20, Q9UEH3, A0A087X125, S5R8H1, S5R8G8, E9PLI9, B7Z1F5, E9PIW6                                                                                                         |
|                                                                  | KEGG_PATHWAY     | hsa00590:Arachidonic acid metabolism                           | 3     | 0.69444444 | 0.5059576  | Q9UQ59, S5RV29, G3V188, S5RXA4, P33261, S5RG22, P10632, P11712, S5RV20, Q9UEH3, A0A087X125, S5R8H1, S5R8G8, E9PLI9, B7Z1F5, E9PIW6                                                                                                         |
|                                                                  | KEGG_PATHWAY     | hsa00982:Drug metabolism - cytochrome P450                     | 3     | 0.69444444 | 0.56478116 | Q9UQ59, S5RV29, G3V188, S5RXA4, P33261, S5RG22, P10632, P11712, S5RV20, Q9UEH3, A0A087X125, S5R8H1, S5R8G8, E9PLI9, B7Z1F5, E9PIW6                                                                                                         |
| <b>Function: innate immunity (ES = 0.97)</b>                     |                  |                                                                |       |            |            |                                                                                                                                                                                                                                            |
| Annotation Cluster 12                                            | Category         | Term                                                           | Count | %          | PValue     | Genes                                                                                                                                                                                                                                      |
|                                                                  | UP_SEQ_FEATURE   | Leucin Rich Repeats LRR 8                                      | 8     | 1.85185185 | 0.03153886 | L8E7L4, B6UV79, B4DXB5, A0A0C4DH17, A0A0C4DFY3, A0A0A0MRE3, Q9Y4C4, G3V5X4, H3BLT9, Q8WXH0, HOYA04, Q6UXK5, T2HV29, Q14392, A0A087WZ24, Q7RTR2, P59046, A0A1D5RMN4, A0A1S0QI99, Q96RT1, C9JDA1, H0Y9E8, B4DIP2, P23945, A0A0C4DGK3, F8WBM4 |
|                                                                  | UP_SEQ_FEATURE   | Leucin Rich Repeats LRR 7                                      | 8     | 1.85185185 | 0.06797067 | L8E7L4, B6UV79, B4DXB5, A0A0C4DH17, A0A0C4DFY3, A0A0A0MRE3, Q9Y4C4, G3V5X4, H3BLT9, Q8WXH0, HOYA04,                                                                                                                                        |

|                |                           |   |            |            |                                                                                                                                                                                                                                                                                                                                                                                                                                                                                                                                                                                                                                                                                                                                                                                                                                                                         |
|----------------|---------------------------|---|------------|------------|-------------------------------------------------------------------------------------------------------------------------------------------------------------------------------------------------------------------------------------------------------------------------------------------------------------------------------------------------------------------------------------------------------------------------------------------------------------------------------------------------------------------------------------------------------------------------------------------------------------------------------------------------------------------------------------------------------------------------------------------------------------------------------------------------------------------------------------------------------------------------|
| UP_SEQ_FEATURE | Leucin Rich Repeats LRR 6 | 8 | 1.85185185 | 0.13395352 | Q6UXK5, T2HV29, Q14392, A0A087WZ24, Q7RTR2, P59046, A0A1D5RMN4, A0A1S0QI99, Q96RT1, C9JDA1, H0Y9E8, B4DIP2, P23945, A0A0C4DGK3, F8WBM4 L8E7L4, B6UV79, B4DXB5, A0A0C4DH17, A0A0C4DFY3, A0A0A0MRE3, Q9Y4C4, G3V5X4, H3BLT9, Q8WXH0, H0YA04, Q6UXK5, T2HV29, Q14392, A0A087WZ24, Q7RTR2, P59046, A0A1D5RMN4, A0A1S0QI99, Q96RT1, C9JDA1, H0Y9E8, B4DIP2, P23945, A0A0C4DGK3, F8WBM4 L8E7L4, B6UV79, B4DXB5, A0A0C4DH17, A0A0C4DFY3, A0A0A0MRE3, Q9Y4C4, G3V5X4, H3BLT9, Q8WXH0, H0YA04, Q6UXK5, T2HV29, Q14392, A0A087WZ24, Q7RTR2, P59046, A0A1D5RMN4, A0A1S0QI99, Q96RT1, C9JDA1, H0Y9E8, B4DIP2, P23945, A0A0C4DGK3, F8WBM4 L8E7L4, B6UV79, B4DXB5, A0A0C4DH17, A0A0C4DFY3, A0A0A0MRE3, Q9Y4C4, G3V5X4, H3BLT9, Q8WXH0, H0YA04, Q6UXK5, T2HV29, Q14392, A0A087WZ24, Q7RTR2, P59046, A0A1D5RMN4, A0A1S0QI99, Q96RT1, C9JDA1, H0Y9E8, B4DIP2, P23945, A0A0C4DGK3, F8WBM4 |
| UP_SEQ_FEATURE | Leucin Rich Repeats LRR 5 | 8 | 1.85185185 | 0.190516   |                                                                                                                                                                                                                                                                                                                                                                                                                                                                                                                                                                                                                                                                                                                                                                                                                                                                         |
| UP_SEQ_FEATURE | Leucin Rich Repeats LRR 4 | 8 | 1.85185185 | 0.26123635 |                                                                                                                                                                                                                                                                                                                                                                                                                                                                                                                                                                                                                                                                                                                                                                                                                                                                         |

| Function: Blood coagulation (ES = 0.94) |                |                                                         |       |            |            |                                                                                                            |
|-----------------------------------------|----------------|---------------------------------------------------------|-------|------------|------------|------------------------------------------------------------------------------------------------------------|
| Annotation Cluster 13                   | Category       | Term                                                    | Count | %          | PValue     | Genes                                                                                                      |
|                                         | UP_SEQ_FEATURE | domain:F5/8 type C                                      | 3     | 0.69444444 | 0.03620894 | Q9UHC6, Q5T241, H0Y570, A0A087WTA1, Q16832, Q5T244, E9PDN6, Q5T245, Q9C0A0, A0A024R906, F5H107, A0A0A0MR20 |
|                                         | SMART          | SM00231:FA58C                                           | 3     | 0.69444444 | 0.08352304 | Q9UHC6, Q5T241, H0Y570, A0A087WTA1, Q16832, Q5T244, E9PDN6, Q5T245, Q9C0A0, A0A024R906, F5H107, A0A0A0MR20 |
|                                         | INTERPRO       | IPR000421:Coagulation factor 5/8 C-terminal type domain | 3     | 0.69444444 | 0.1055893  | Q9UHC6, Q5T241, H0Y570, A0A087WTA1, Q16832, Q5T244, E9PDN6, Q5T245, Q9C0A0, A0A024R906, F5H107, A0A0A0MR20 |
|                                         | INTERPRO       | IPR008979:Galactose-binding domain-like                 | 3     | 0.69444444 | 0.54643549 | Q9UHC6, Q5T241, H0Y570, A0A087WTA1, Q16832, Q5T244, E9PDN6, Q5T245, Q9C0A0, A0A024R906, F5H107, A0A0A0MR20 |

| Function: subcellular (cytoskeleton) localization (ES = 0.81) |                  |                                                                                                          |       |            |            |                        |
|---------------------------------------------------------------|------------------|----------------------------------------------------------------------------------------------------------|-------|------------|------------|------------------------|
| Annotation Cluster 14                                         | Category         | Term                                                                                                     | Count | %          | PValue     | Genes                  |
|                                                               | GOTERM_CC_DIRECT | GO:0035253~ciliary rootlet                                                                               | 3     | 0.69444444 | 0.01879502 | P33176, Q12840, O60282 |
|                                                               | UP_SEQ_FEATURE   | region of interest:Globular<br>GO:0008574~ATP-dependent<br>microtubule motor activity, plus-end-directed | 3     | 0.69444444 | 0.04083697 | P33176, Q12840, O60282 |
|                                                               | GOTERM_MF_DIRECT | GO:0030705~cytoskeleton-dependent                                                                        | 3     | 0.69444444 | 0.05527477 | P33176, Q12840, O60282 |
|                                                               | GOTERM_BP_DIRECT | intracellular transport                                                                                  | 3     | 0.69444444 | 0.06156746 | P33176, Q12840, O60282 |

|                  |                                                                            |   |            |            |                        |
|------------------|----------------------------------------------------------------------------|---|------------|------------|------------------------|
| UP_SEQ_FEATURE   | domain:Kinesin-motor<br>IPR019821:Kinesin, motor region,<br>conserved site | 3 | 0.69444444 | 0.224336   | P33176, Q12840, O60282 |
| INTERPRO         |                                                                            | 3 | 0.69444444 | 0.23080968 | P33176, Q12840, O60282 |
| INTERPRO         | IPR001752:Kinesin, motor domain                                            | 3 | 0.69444444 | 0.26383411 | P33176, Q12840, O60282 |
| SMART            | SM00129:KISc                                                               | 3 | 0.69444444 | 0.27840794 | P33176, Q12840, O60282 |
| GOTERM_CC_DIRECT | GO:0005871~kinesin complex                                                 | 3 | 0.69444444 | 0.31943138 | P33176, Q12840, O60282 |
| GOTERM_MF_DIRECT | GO:0003777~microtubule motor activity                                      | 3 | 0.69444444 | 0.5421099  | P33176, Q12840, O60282 |
| UP_KEYWORDS      | Motor protein                                                              | 3 | 0.69444444 | 0.76065031 | P33176, Q12840, O60282 |

---

Source = identify the source of functional terms associated; UP\_SF = UP\_SEQ\_FEATURE; UP\_K = UP\_KEYWORD; IP = INTERPRO; GO\_DIR = GOTERM\_MF\_DIRECT; GO\_BP = GOTERM\_BP\_DIRECT; GO\_CC = GOTERM\_CC\_DIRECT; KEGG = KEGG\_PATHWAY; COG\_ONT = COG\_ONTOLOGY. N = number of Uniprot associated genes. The red written identifies non-significant (P > 0.05) gene ontology Terms.
